# Supplementary material for: Service readiness for the management of non-communicable diseases in publicly financed facilities in Malawi: findings from the 2019 Harmonised Health Facility Assessment census survey
Source: PubMed Central journal article supplement — BMJ Open. 2024 Jan 4;14(1):e072511. doi: 10.1136/bmjopen-2023-072511 (PMC10773330; doi:10.1136/bmjopen-2023-072511), 2024-01-04
Supplement: bmjopen-2023-072511.draft_revisions.pdf [file bmjopen-2023-072511.draft_revisions.pdf]

# BMJ Open

BMJ Open is committed to open peer review. As part of this commitment we make the peer review history of every article we publish publicly available.

When an article is published we post the peer reviewers' comments and the authors' responses online. We also post the versions of the paper that were used during peer review. These are the versions that the peer review comments apply to.

The versions of the paper that follow are the versions that were submitted during the peer review process. They are not the versions of record or the final published versions. They should not be cited or distributed as the published version of this manuscript.

BMJ Open is an open access journal and the full, final, typeset and author-corrected version of record of the manuscript is available on our site with no access controls, subscription charges or pay-per-view fees (<http://bmjopen.bmj.com>).

If you have any questions on BMJ Open's open peer review process please email [info.bmjopen@bmj.com](mailto:info.bmjopen@bmj.com)

# BMJ Open

## Service Readiness and Limiting Factors to Manage Non-Communicable Diseases in Malawi: an Analysis of the 2019 Harmonized Health Facility Assessment Survey

|                               |                                                                                                                                                                                                                                                                                                                                                                                                                                                                                                                                                                                                                                                                                                                                                                                                                                                                                                                                                                                                                                                                                                                                                                            |
|-------------------------------|----------------------------------------------------------------------------------------------------------------------------------------------------------------------------------------------------------------------------------------------------------------------------------------------------------------------------------------------------------------------------------------------------------------------------------------------------------------------------------------------------------------------------------------------------------------------------------------------------------------------------------------------------------------------------------------------------------------------------------------------------------------------------------------------------------------------------------------------------------------------------------------------------------------------------------------------------------------------------------------------------------------------------------------------------------------------------------------------------------------------------------------------------------------------------|
| Journal:                      | <i>BMJ Open</i>                                                                                                                                                                                                                                                                                                                                                                                                                                                                                                                                                                                                                                                                                                                                                                                                                                                                                                                                                                                                                                                                                                                                                            |
| Manuscript ID                 | bmjopen-2023-072511                                                                                                                                                                                                                                                                                                                                                                                                                                                                                                                                                                                                                                                                                                                                                                                                                                                                                                                                                                                                                                                                                                                                                        |
| Article Type:                 | Original research                                                                                                                                                                                                                                                                                                                                                                                                                                                                                                                                                                                                                                                                                                                                                                                                                                                                                                                                                                                                                                                                                                                                                          |
| Date Submitted by the Author: | 16-Feb-2023                                                                                                                                                                                                                                                                                                                                                                                                                                                                                                                                                                                                                                                                                                                                                                                                                                                                                                                                                                                                                                                                                                                                                                |
| Complete List of Authors:     | <p>Wang, Zicheng ; Harvard University, T.H. Chan School of Public Health<br/> Cao, Yanjia ; The University of Hong Kong, Department of Geography<br/> Ahmed, Sali; University of Washington, Department of Global Health<br/> Coates, Matthew M.; Brigham and Women's Hospital, Department of<br/> Medicine<br/> Twea, Pakwanja ; University of Bergen, Department of Global Health and<br/> Primary Care (IGS); Ministry of Health, Department of Planning and<br/> Policy Development<br/> Ma, Mingyang; Harvard University, Department of Biostatistics<br/> Chiwanda Banda, Jonathan; Ministry of Health, Curative and Medical<br/> Rehabilitation Services ; Kamuzu University of Health Sciences,<br/> Department of Community and Environmental Health<br/> Wroe, Emily; Brigham and Women's Hospital, Department of Medicine<br/> Bai, Lan; Nanjing University of Traditional Chinese Medicine, Department<br/> of Public Administration<br/> Watkins, DA; University of Washington, Seattle, Department of Medicine;<br/> University of Washington Seattle Campus, Department of Global Health<br/> Su, Yanfang; University of Washington, School of Medicine</p> |
| Keywords:                     | Health Services Accessibility, Health Equity, Primary Health Care                                                                                                                                                                                                                                                                                                                                                                                                                                                                                                                                                                                                                                                                                                                                                                                                                                                                                                                                                                                                                                                                                                          |
|                               |                                                                                                                                                                                                                                                                                                                                                                                                                                                                                                                                                                                                                                                                                                                                                                                                                                                                                                                                                                                                                                                                                                                                                                            |

SCHOLARONE™  
Manuscripts

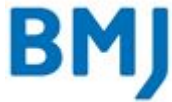

I, the Submitting Author has the right to grant and does grant on behalf of all authors of the Work (as defined in the below author licence), an exclusive licence and/or a non-exclusive licence for contributions from authors who are: i) UK Crown employees; ii) where BMJ has agreed a CC-BY licence shall apply, and/or iii) in accordance with the terms applicable for US Federal Government officers or employees acting as part of their official duties; on a worldwide, perpetual, irrevocable, royalty-free basis to BMJ Publishing Group Ltd ("BMJ") its licensees and where the relevant Journal is co-owned by BMJ to the co-owners of the Journal, to publish the Work in this journal and any other BMJ products and to exploit all rights, as set out in our [licence](#).

The Submitting Author accepts and understands that any supply made under these terms is made by BMJ to the Submitting Author unless you are acting as an employee on behalf of your employer or a postgraduate student of an affiliated institution which is paying any applicable article publishing charge ("APC") for Open Access articles. Where the Submitting Author wishes to make the Work available on an Open Access basis (and intends to pay the relevant APC), the terms of reuse of such Open Access shall be governed by a Creative Commons licence – details of these licences and which [Creative Commons](#) licence will apply to this Work are set out in our licence referred to above.

Other than as permitted in any relevant BMJ Author's Self Archiving Policies, I confirm this Work has not been accepted for publication elsewhere, is not being considered for publication elsewhere and does not duplicate material already published. I confirm all authors consent to publication of this Work and authorise the granting of this licence.

1  
2  
3 Service Readiness and Limiting Factors to Manage Non-Communicable Diseases in Malawi:  
4 an Analysis of the 2019 Harmonized Health Facility Assessment Survey  
5  
6  
7

8 Zicheng Wang<sup>1^</sup>, Yanjia Cao<sup>2^</sup>, Sali Amend<sup>3^</sup>, Matthew M. Coates<sup>4</sup>, Pakwanja Twea<sup>5,6</sup>,  
9 Mingyang Ma<sup>7</sup>, Jonathan Chiwanda<sup>8</sup>, Emily B. Wroe<sup>4</sup>, Lan Bai<sup>9</sup>, David A. Watkins<sup>3,10</sup>,  
10 Yanfang Su<sup>3\*</sup>  
11

12 [1] Department of Epidemiology, Harvard T.H. Chan School of Public Health, Boston, MA  
13 02115

14 [2] Department of Geography, The University of Hong Kong, Hong Kong SAR

15 [3] Department of Global Health, School of Public Health, University of Washington, WA,  
16 USA, 98195

17 [4] Center for Integration Science in Global Health Equity, Division of Global Health Equity,  
18 Department of Medicine, Brigham and Women's Hospital, Boston, MA, USA, 02115

19 [5] Bergen Centre for Ethics and Priority Setting, University of Bergen, Bergen, Norway

20 [6] Department of Planning and Policy Development, Ministry of Health, Lilongwe, Malawi

21 [7] Department of Biostatistics, Harvard University, Boston, Massachusetts, USA, 02115

22 [8] Department of Clinical Services, Ministry of Health, Lilongwe, Malawi

23 [9] Department of Public Administration, School of Health Economics and Management,  
24 Nanjing University of Traditional Chinese Medicine, Nanjing, China

25 [10] Division of General Internal Medicine, Department of Medicine, University of  
26 Washington, 98195  
27

28 ^Co-first authors

29 \*Corresponding author

30 Zicheng Wang

31 [zicheng\\_wang@hsph.harvard.edu](mailto:zicheng_wang@hsph.harvard.edu)  
32  
33

34 Yanjia Cao

35 [yanjiac@hku.hk](mailto:yanjiac@hku.hk)  
36  
37

38 Sali Amend

39 [salia@uw.edu](mailto:salia@uw.edu)  
40  
41

42 Matthew M. Coates

43 [mmcoates@bwh.harvard.edu](mailto:mmcoates@bwh.harvard.edu)  
44  
45

46 Pakwanja Twea

47 [pakwanja.twea@health.gov.mw](mailto:pakwanja.twea@health.gov.mw)  
48  
49  
50  
51  
52  
53  
54  
55  
56  
57  
58  
59  
60

1  
2  
3  
4  
5 Mingyang Ma

6 [mma@hsph.harvard.edu](mailto:mma@hsph.harvard.edu)  
7  
8

9  
10 Jonathan Chiwanda

11 [jonchiwanda@gmail.com](mailto:jonchiwanda@gmail.com)  
12  
13

14  
15 Emily Wroe

16 [ewroe@pih.org](mailto:ewroe@pih.org)  
17  
18

19  
20 Lan Bai

21 [dreamhour@163.com](mailto:dreamhour@163.com)  
22  
23

24  
25 David A. Watkins

26 [davidaw@uw.edu](mailto:davidaw@uw.edu)  
27  
28

29  
30 Yanfang Su

31 [yfsu@uw.edu](mailto:yfsu@uw.edu)  
32  
33  
34  
35  
36  
37  
38  
39  
40  
41  
42  
43  
44  
45  
46  
47  
48  
49  
50  
51  
52  
53  
54  
55  
56  
57  
58  
59  
60

For peer review only

## ABSTRACT

**Objectives:** The burden of non-communicable diseases (NCDs) continues to grow in low- and middle-income countries (LMICs), including Malawi. To inform policymakers and planners on the preparedness of the Malawian healthcare system and areas with limited services, we estimated the readiness of NCD services in the Malawian publicly financed healthcare facilities.

**Method:** We analyzed data from 564 publicly financed facilities in Malawi from the Harmonized Health Facility Assessment (HHFA) census survey, including 512 Primary Healthcare (PHC) and 52 Secondary and Tertiary health facilities. To characterize service readiness, we estimated the percentage of facilities where the necessary components required to provide NCD services are "available" and the percentage of facilities where the necessary components to provide NCD services are "functional" in a manner that allows service provision. Further, we estimated permanently unavailable items to identify service readiness bottlenecks.

**Results:** Less than 40% of the PHCs were ready to deliver service for any of the 13 NCDs included in the analysis. Only 5% of the PHC facilities were ready to provide chronic type 1 diabetes services, and only 7% and 8% were ready to provide services for chronic Rheumatic Heart Disease (RHD) and chronic Asthma. Around 38% of the Secondary and Tertiary facilities were ready to manage heart failure, and only 29% were ready to provide pain management services. Ensuring the availability of potential bottlenecks to service readiness like insulin and beclomethasone inhalers would improve the proportion of PHC facilities ready to provide type 1 diabetes and chronic asthma services from 5% to 43% and 8% to 71%, respectively.

**Conclusion:** We estimate that public health facilities in Malawi, especially at the PHC level, remain to experience gaps in essential medicines and equipment required for NCDs diagnosis and management. Targeted investments can support the health system in Malawi to make substantial improvements in NCDs services readiness.

### Strengths and limitations of this study

- The HHFA survey does not include questions about the availability of the peak flow meter and micro nebulizer, which are essential for treating acute asthma.
- Data from the 2015 SPA survey about the availability of these two items suggest that we may have overestimated the service readiness for acute asthma.
- We haven't conducted any imputation for missingness.
- The HHFA survey did not collect data regarding the majority of medical components required for inpatient management apart from surgical services.
- The study is limited by the HHFA survey methodology, as the survey only covered a subset of medicines and equipment in surveying permanent unavailability.

## OBJECTIVES

The growing burden of NCDs in low- and middle-income countries (LMICs) is particularly concerning. According to World Health Organization (WHO), 77% of the annual global NCD deaths occur in LMICs.(1) In 2021, NCDs caused 41 million deaths worldwide, among which

1  
2  
3 29 million died of the four major conditions, including cardiovascular disease, cancer,  
4 chronic respiratory disease, and diabetes. Several studies have reported low levels of NCD  
5 service readiness in LMICs.(2,3)  
6

7 Located in sub-Saharan Africa with an 18.6 million population, Malawi remains one of the  
8 world's poorest countries, with a national Gross Domestic Product (GDP) of only \$640 per  
9 capita in 2021.(4) As a low-income country, Malawi suffers from the high burden of NCDs  
10 and their economic consequences that affect overall economic development and lead to  
11 catastrophic health expenditures (CHE) for Malawians seeking care.(5–7) As of 2019, NCDs  
12 accounted for 40% of Malawi's mortality, which increased from 30% in 2010.(8) A  
13 household survey conducted in 2012 in three rural districts in Malawi estimated that 21.3 %  
14 of all households with at least one member seeking care for an NCD condition incurred CHE  
15 due to NCDs.(7) Therefore, characterizing the readiness of health systems to manage NCDs  
16 in Malawi will enable the identification of areas that require investment to alleviate the  
17 existing and growing burden of NCDs.  
18  
19

20  
21 Several prior studies have provisionally assessed the preparedness of the Malawian  
22 healthcare system. A 2018 study collected data from the 2013-2015 Malawi Service  
23 Provision Assessment (SPA) surveys and computed readiness scores to indicate the  
24 availability of medications, equipment, staff, and protocols in health facilities.(3) The study  
25 found that among diabetes, CVD, and chronic respiratory disease, diagnosing and treating  
26 diabetes have the lowest readiness.(3) Another SPA-based study on first-referral level  
27 hospitals in eight low-income countries, including Malawi, estimated the percentages of  
28 facilities with complete minimal sets of medications and equipment needed for thirteen  
29 conditions, including chronic asthma, acute asthma, chronic type 1 diabetes, chronic type 2  
30 diabetes, acute diabetic events, hypertension (HTN), heart failure, and rheumatic heart  
31 disease (RHD), acute epilepsy, pain care, and minor surgery.(9) The study found that acute  
32 epilepsy services were the most available (95%), and acute asthma services were unavailable  
33 at any first-referral level hospitals in Malawi. However, findings from these studies only  
34 presented assessments around 2015, when the SPA dataset was published.(3,9) A report using  
35 more recent health facility data is necessary to present a current picture to inform policy and  
36 planning purposes. A more recent study estimated screening, diagnosis, management, and  
37 rehabilitation services readiness for NCDs based on a survey of 22 health facilities between  
38 November 2019 and March 2020.(10) The study found that cardiology and renal care were  
39 only available at two of the four surveyed tertiary hospitals and none of the district hospitals  
40 or health centers.(10) The two district hospitals surveyed had clinics where services for  
41 diabetes and hypertension were available.(10) At health centers, ten of 16 offered  
42 hypertension services, six offered diabetes care, and two offered asthma or COPD care.(10)  
43 In addition, only seven of the overall 22 facilities had half the essential drugs to treat  
44 NCDs.(10) Many facilities also lacked laboratory testing used in diagnosing and managing  
45 NCDs.(10)  
46  
47  
48  
49  
50  
51  
52

53 Our study aims to fill the knowledge gap about the service readiness of the Malawian  
54 healthcare system for major NCD conditions using the most recent 2019 Harmonized Health  
55 Facility Assessment (HHFA) survey data that covered all publicly financed health facilities in  
56 the country. Our study has two main goals. The first goal is to estimate the service readiness  
57 of Malawian healthcare facilities by analyzing the availability and functionality of essential  
58 medications and equipment to diagnose and treat common NCD conditions that present early  
59  
60

1  
2  
3 in life and are associated with a significant disease burden. The conditions included in the  
4 analysis are acute and chronic asthma, hypertension (HTN), stage 1 and 2 and complicated  
5 HTN, heart failure, rheumatic heart disease (RHD), type 1 and 2 diabetes mellitus (DM),  
6 epilepsy, injuries, and minor surgical conditions, and chronic pain (Appendix Table 1).  
7 Because primary care facilities and secondary/tertiary hospitals are designed to provide  
8 different levels of care, we summarized the major NCD services at each level. The second  
9 aim is to identify potential bottleneck items that limit the facilities' service readiness.  
10  
11

## 12 **METHODS**

### 13 **Sample and Representativeness**

14  
15 The healthcare delivery system in Malawi is divided into three ownership categories: public,  
16 private for-profit (PFP), and private not-for-profit (PNFP).<sup>(11)</sup> While PFP and PNFP  
17 facilities are slowly growing fee-charging systems, the publicly financed sector is free for  
18 everyone.<sup>(12)</sup> PFP and PNFP facilities are not open to everyone and only represent 11% of  
19 the facilities in the Malawian health system.<sup>(13)</sup> We focused on the free publicly financed  
20 facilities owned by the Malawian government or the Christian Health Associations of Malawi  
21 (CHAM) because of their accessibility to the population and because they comprise the large  
22 majority of the health system.<sup>(14)</sup> The Malawi health system consists of three levels:  
23 primary, secondary, and tertiary. Health centers and community hospitals are on the primary  
24 care level and offer ambulatory and maternity services. Secondary facilities are first-referral  
25 level hospitals (also called district hospitals), and the central hospitals are on the tertiary  
26 level.<sup>(11)</sup>  
27  
28  
29

30 With a catchment area of 11 to 40 primary health centers, district hospitals serve a range of  
31 populations between 140,000 and 1,400,000.<sup>(15)</sup> District and central hospitals in Malawi are  
32 designed to provide Secondary and Tertiary Care. In contrast, health centers and  
33 rural/community hospitals are widely accessible to residents within local communities and  
34 thus recognized as Primary Healthcare (PHC) facilities.  
35

36 The 2019 HHFA is a cross-sectional survey funded and developed by the World Health  
37 Organization, the World Bank, and other collaborators. It is an update of the Service  
38 Availability and Readiness Assessment (SARA) survey, built upon the SPA survey. The HHFA  
39 has a census sample of all facilities in Malawi. In this study, we acquired data from the 2019  
40 HHFA, which surveyed 1,098 Malawian health facilities across all levels and ownerships. Our  
41 study sample included 576 public facilities in total: 515 PHCs (471 health centers and 41  
42 rural/community hospitals) and 52 Secondary and Tertiary facilities (48 district hospitals and  
43 4 central hospitals). The spatial distribution of all facilities is displayed in Appendix Figure 1.  
44 The 48 district hospitals included actual district hospitals, large health centres functioning as  
45 first-level-referral hospitals in certain districts (quasi-district hospitals), and first-referral-level  
46 CHAM hospitals. We removed Zomba Mental Hospital from our sample because we are only  
47 interested in facilities that provide general care. PHCs were expected as the first contact of the  
48 healthcare system for patients in Malawi. Patients in PHC facilities will be referred to the  
49 Secondary and Tertiary facilities for comprehensive diagnostics or more sophisticated care.  
50  
51  
52

53 The total number of facilities in each category is summarized in Table 1. As a census survey  
54 database, the HHFA collected data from all functional facilities at the time of the survey. There  
55 were 485 health centres registered by the Administration of Health and only 471 surveyed by  
56 the HHFA. Therefore, the 14 health centres not surveyed in HHFA were defined as "non-  
57 functional." Our sample captures all publicly financed facilities; thus, the estimates represent  
58 the readiness of the publicly funded Malawian healthcare system.  
59  
60



Table 1. Summary of facility representation in each category

| Facility type              | Primary Healthcare |                                 |       | Secondary and Tertiary facilities |                   |       |
|----------------------------|--------------------|---------------------------------|-------|-----------------------------------|-------------------|-------|
|                            | Health centres     | Rural/Community hospitals (RCH) | Total | District hospitals                | Central hospitals | Total |
| HHFA samples               | 471**              | 41                              | 512   | 48                                | 4                 | 52    |
| Non-functional facilities* | 14                 | 0                               | 14    | 0                                 | 0                 | 0     |
| Total                      | 485                | 41                              | 526   | 48                                | 4                 | 52    |

\*We consider the facilities not surveyed by the HHFA as "non-functional" because HHFA is a census survey.

\*\*Three quasi-district hospitals were categorized as "District Hospitals": Ndirande Health Centre, Matawale Health Centre, and Mzuzu Health Centre.

### Data Analysis

This study focused on the service readiness to diagnose and treat thirteen NCD conditions, including five acute and seven chronic conditions (see Appendix Table 1 for the list of conditions). Service readiness is measured as the percentage of health facilities with all functional medications and equipment to diagnose and treat common NCD conditions. We applied the list of medications and equipment for each condition from Gupta et al. study with minor refinements.(9)

We consulted local partners in the Ministry of Health to determine the expected facility level for each of the thirteen services. (Appendix Table 1) In addition to identifying expected services by facility type, we also examine data missingness to refine whether the required medicines and equipment are expected by facility type. The corresponding data in the HHFA survey were extracted for analysis, and we detailed the conditions, items, indicators, and related facility types in Appendix Table 2. When certain services were not expected at health centers, we only estimated these services in rural/community hospitals at the PHC level.

Regarding missingness, the HHFA survey did not include questions on peak flow meters and micro-nebulizers, which are the required equipment for asthma management. Therefore, we examined SPA data to understand how these missing variables might have affected the asthma readiness measure. For the variables with close to 100% missing data, we assumed that the item was not expected at the facility level.

### Patient and Public Involvement:

No patient involved.

### Measures

A medicine or equipment can be "available and functional," "available but not functional," "not available (at this time)," or "never available" at the facility. For each item, we calculated three

indicators: 1) availability, 2) functionality, and 3) permanent unavailability.

**Availability** refers to the physical presence of the medicines or equipment required to provide services at the health facility during the survey. For example, a stethoscope is necessary for blood pressure measurement, and we measure the percentage of health facilities with a stethoscope.

$$Availability = \frac{\sum \# \text{ of facilities with available element}}{\text{Total number of facilities}}$$

**Functionality** refers to the presence of the medicines or equipment required to provide the service in operating conditions that allow service provision at the time of the survey. For example, the surveyor checked whether a stethoscope was working and whether insulin for type 1 diabetes was not expired and stored at the required temperature. We measure the percentage of facilities with available and working elements.

$$Functionality = \frac{\sum \# \text{ of facilities with available and working element}}{\text{Total \# of facilities}}$$

**Permanent unavailability** is when the medicines or equipment is never present at the health facility. For example, insulin for type 1 diabetes was not present in the pharmacy for patients to dispense the prescription, and it was not a temporary situation.

$$Permanently \text{ unavilable service} = \frac{\sum \# \text{ of facilities with elements that were never present}}{\text{Total \# of facilities}}$$

For each facility, we estimated service readiness based on the functionality of all required items. We estimated service readiness bottlenecks based on permanent unavailability. The computation process is expressed as follows:

$$Service \text{ Readiness} = \frac{\sum f_i}{N}, \quad i \in [1, N],$$

$$f_i = \begin{cases} 1, & \text{if } item_1 = item_2 = item_j = item_m = 1, \quad j \in [1, m] \\ 0, & \text{if } \min(item_j) = 0. \end{cases}$$

According to the law of the minimum, service readiness is dictated by the limiting factor, a principle developed in agricultural science by Carl Sprengel (1840).<sup>(9)</sup> The limiting factor that prevents the service from being ready was identified in our analysis.

$$Supply \text{ Bottleneck} = \frac{\sum pu_i}{N}, \quad i \in [1, N]$$

Where  $f_i$  refers to functionality at facility  $i$ , and  $pu_i$  refers to permanent unavailability at facility  $i$ . When a facility has all essential components available and functioning, it is labeled "ready." Otherwise, the facility is labeled as "Not ready." We estimated service readiness by NCD condition.

## RESULTS

Overall service readiness by condition and item functionality are presented in Figure 1. Certain

1  
2  
3 items contributed substantially to low service readiness scores for conditions. For example,  
4 beclomethasone inhalers, salbutamol inhalers, and stethoscopes were needed to manage  
5 chronic asthma. Although 71% and 92% of PHC were equipped with functional salbutamol  
6 inhalers and stethoscopes, the service readiness was 8% because only 8% of PHC were  
7 equipped with beclomethasone inhalers. Beclomethasone inhaler was a limiting item for  
8 chronic asthma service readiness among PHCs. Other limiting items among PHCs include  
9 calcium channel blockers for hypertension services, insulin for type 1 diabetes, ultrasound  
10 equipment for heart failure, injectable epinephrine in case of an allergic reaction to injectable  
11 benzathine penicillin for chronic RHD, and functional x-ray machines for acute asthma.  
12 Among the Secondary and Tertiary facilities, increasing the number of functional  
13 beclomethasone inhalers would also improve their readiness for chronic asthma service.  
14  
15

16 Regarding missingness and potential bias, nebulizer and peak-flow meter measures were not  
17 included in the HHFA survey, and we analyzed 2015 SPA data to understand potential bias in  
18 our estimates. It turns out that nebulizers were available at three of four central hospitals but  
19 only at 22% of rural/community hospitals. Peak-flow meters were available at one of four  
20 central hospitals but only at 5% of rural/community hospitals. Our estimates based on 2019  
21 HHFA data are likely to overestimate asthma service readiness. Service readiness for acute  
22 asthma was estimated to be 15%-17% at the PHC level and 44%-50% at secondary and tertiary  
23 hospitals based on HHFA surveys. However, the service availability among first-level referral  
24 hospitals was estimated to be 0 based on 2015 SPA data, in which the peak flow meter was the  
25 limiting factor at 5% availability. If the peak flow meter and nebulizer had been at the same  
26 level as the 2015 SPA survey results (Appendix Table 3), acute asthma service readiness would  
27 have been less than 5% at PHCs and less than 6% at secondary and tertiary hospitals. While  
28 availability may have grown since 2015, if availability remains unchanged, it may be an  
29 alarming limiting factor for the overall readiness for acute asthma care.  
30  
31  
32

33 Given that SPA data were collected in 2015 and with a smaller sample size than HHFA, we  
34 did not incorporate 2015 SPA data into 2019 HHFA data. Instead, we used it to shed light on  
35 potential biases. This is an example to show that when the missing variable is the limiting factor,  
36 the missingness might significantly bias the estimation of service readiness. According to the  
37 guideline and missing data investigation, we assumed that the following services were not  
38 expected at health centers: heart failure, chronic RHD, acute asthma, acute diabetic events,  
39 acute epilepsy, and injuries. Except for the aforementioned missingness, all other variables  
40 have less than 25% missing data.  
41  
42  
43  
44  
45  
46  
47  
48  
49  
50  
51  
52  
53  
54  
55  
56  
57

58 **Figure 1:** Service readiness and service functionality for each essential medical component at  
59 PHCs and Secondary and Tertiary facilities  
60

To compare the service readiness of both PHC and Secondary and Tertiary facilities for chronic and acute NCD conditions, we visualized the readiness score in Figure 2. Overall, for all NCD conditions, the service readiness of Secondary and Tertiary facilities was higher than the PHCs in Malawi. We found that the service readiness was lower than 35% for all NCD conditions we studied in PHC facilities. The readiness to treat type 1 diabetes and chronic RHC was only 5% and 7%, respectively. In contrast, we found that Secondary and Tertiary facilities in Malawi were reaching full readiness for type 2 diabetes (94%), hypertension (88%), and acute epilepsy (85%). However, relatively lower readiness was also identified for chronic asthma, pain care, heart failure, chronic Rheumatic Heart Disease (RHD), moderate/severe acute asthma, and injuries/ acute minor surgical services.

Figure 2: NCD service readiness of the Malawi health system by level

In this research, we further analyzed the essential equipment and medications that are “permanently unavailable.” As shown in Table 2, one of our “bottleneck” items, the beclomethasone inhaler, has been permanently unavailable in 74% of PHCs. In addition, 81% of the PHCs never have access to insulin. Table 2 also reveals items well in stock in the Malawi healthcare system. Oral pain medications, salbutamol inhalers, and diazepam injections were three examples with zero permanent unavailability in the HHFA survey.

Table 2: Permanent unavailability of essential equipment and medications among PHC and Secondary and Tertiary facilities.

|                                  | Condition             | Essential Equipment & Medication                                                     | PHC (N = 512) | Secondary & Tertiary facilities (N = 52) |
|----------------------------------|-----------------------|--------------------------------------------------------------------------------------|---------------|------------------------------------------|
| Chronic Conditions               | Chronic Asthma (PHC)  | Beclomethasone inhaler                                                               | 74%           | 29%                                      |
|                                  |                       | Salbutamol inhaler                                                                   | 8%            | 0%                                       |
|                                  | Hypertension (PHC)    | At least two or three of: calcium channel blocker, ACE inhibitor, thiazide, atenolol | 12%           | 0%                                       |
|                                  | Type 1 diabetes (PHC) | Insulin                                                                              | 81%           | 2%                                       |
|                                  | Type 2 diabetes (PHC) | Metformin or glibenclamide                                                           | 48%           | 0%                                       |
|                                  | Pain care             | Oral pain medication                                                                 | 0%            | 0%                                       |
| Injectable morphine or pethidine |                       | 7%                                                                                   | 19%           |                                          |

|                                |                                           |                                             |     |     |
|--------------------------------|-------------------------------------------|---------------------------------------------|-----|-----|
|                                |                                           | Atenolol or other beta-blocker              | 24% | 6%  |
|                                |                                           | Captopril, enalapril or other ACE inhibitor | 20% | 6%  |
|                                | Heart failure                             | Furosemide                                  | 12% | 2%  |
|                                |                                           | Benzathine penicillin                       | 44% | 8%  |
|                                | Chronic RHD                               | Injectable epinephrine                      | 5%  | 10% |
| Acute Conditions               | Mild/moderate acute asthma                | Prednisolone                                | 10% | 0%  |
|                                |                                           | Salbutamol inhaler                          | 0%  | 0%  |
|                                | Moderate/severe acute asthma              | Prednisolone                                | 10% | 0%  |
|                                |                                           | Salbutamol inhaler                          | 0%  | 0%  |
|                                |                                           | Hydrocortisone injection                    | 32% | 8%  |
|                                | Acute diabetic events                     | Injectable glucose                          | 0%  | 2%  |
|                                |                                           | Insulin                                     | 49% | 2%  |
|                                | Acute epilepsy                            | Diazepam injection                          | 0%  | 0%  |
|                                | injuries/ acute minor surgical conditions | Lidocaine in minor surgical area            | 2%  | 0%  |
|                                |                                           | Skin disinfectant in minor surgical area    | 5%  | 2%  |
| Sutures in minor surgical area |                                           | 5%                                          | 0%  |     |

## DISCUSSION

In this research, we estimated service readiness for NCD treatment in Malawi based on the 2019 HHFA database. The analysis reveals that less than 40% of PHCs in Malawi are ready to deliver service for any of the 13 NCD services included in the analysis. PHC facilities' readiness to provide care for chronic conditions is low, with the highest readiness of 34% for managing Stage 1/2 hypertension, while only 5% of the PHC facilities were ready to manage type 1 diabetes. PHC facilities' service readiness for acute conditions management was highest for acute epilepsy, with 37% of the PHC facilities having diazepam injections, while only 15% of the PHC facilities were ready to manage moderate and severe asthma. Compared to PHC facilities, service readiness for the 13 NCD conditions included in the analysis is considerably higher in secondary and tertiary facilities. However, services for chronic conditions like pain care, heart failure, and chronic asthma have low readiness scores even at secondary and tertiary facilities (29%, 38%, and 40%, respectively). Our results lined up with other studies that Malawi's health system requires substantial improvement to prepare for the growing burden of NCDs in the country.(9,10,16)

1  
2  
3 It is globally recognized that PHC facilities are essential in providing services for NCDs and  
4 routine care for the elderly and are a cornerstone for achieving universal health coverage. In  
5 2013 the WHO Package of Essential Non-communicable Disease Interventions (WHO PEN)  
6 included managing cardiovascular diseases, diabetes, chronic respiratory diseases, and cancer  
7 prevention and screening through primary care platforms as a minimum requirement for  
8 universal coverage reforms in low-resource settings.(17) The 2018 Declaration of Astana on  
9 PHC emphasizes the role of PHC facilities in providing comprehensive services, including the  
10 control and management of NCDs.(18) The World Bank recommends reinforcing PHC  
11 networks to provide universal coverage of services required for the prevention, early detection,  
12 and low-cost, high-quality management of chronic NCDs.(19) The essential health package  
13 (EHP) developed by the Ministry of the health of Malawi (MOH) included the management of  
14 diabetes type 1 and 2, hypertension, and treatment of injuries as interventions to be provided  
15 as free services at the point of care at primary and secondary levels.(20) However, our study  
16 shows that most PHC facilities had low service readiness for common chronic conditions, while  
17 required medicines and equipment for chronic condition management were more ready at  
18 secondary and tertiary levels. Our analysis indicates suboptimal functionality of essential  
19 services that are part of the EHP. This is in line with MOH concerns about the suboptimal  
20 implementation of the EHP policy due to inadequate resources, low awareness among  
21 stakeholders, and insufficient operationalization of the policy due to the lack of clear financial  
22 mechanisms to ensure the provision of free-of-charge services at the point of care.(20)

23  
24  
25  
26  
27 Ensuring the availability of limiting items would improve the proportion of PHCs ready to  
28 provide care for type 1 diabetes from 6% to 43%. Similarly, increasing the availability of  
29 beclomethasone inhalers would enhance the service readiness for chronic asthma from 8% to  
30 71% among PHCs and from 50% to 88% among Secondary and Tertiary facilities. Asthma  
31 management is not part of the NCD intervention package included in the EHP of Malawi, and  
32 the Standard Treatment Guidelines for Malawi state that beclomethasone is only expected to  
33 be provided at the tertiary level.(20,21) However, the WHO considers beclomethasone as an  
34 essential and cost-effective intervention that can be provided through PHC platforms.(22,23)  
35 Service readiness for NCD treatment in Malawi can be significantly improved by ensuring the  
36 availability and functionality of these items. Increasing the availability of limiting items is in  
37 line with the WHO calls to increase coverage and close the gap between the available and  
38 needed high-impact essential NCD interventions to reduce the burden, healthcare costs, and  
39 suffering due to major NCDs in LMICs.(17,24) This study sheds light on the compatibility of  
40 regulatory guidelines and recommends updating the 2015 Standard Treatment Guidelines for  
41 Malawi in line with changing priorities and policies.

42  
43  
44 This study has the merit of a census sample for analysis and specified facility types. An  
45 assessment of service readiness for NCDs in five countries, including Malawi, reported a total  
46 NCD service capacity score of 59 out of 100 in their study, indicating a low readiness compared  
47 to the benchmark (3), leaving condition-specific readiness unknown. In addition, some prior  
48 research only analyzed the service readiness for first-level-referral hospitals and all facilities  
49 in Malawi, missing detailed information about each service level.(3,9) In our study, we divided  
50 facilities by PHCs and Secondary and Tertiary facilities and categorized facilities into health  
51 centers, rural/community hospitals, district hospitals, and central hospitals. The census samples  
52 from HHFA provide the opportunity to estimate NCD service readiness at the primary,  
53 secondary, and tertiary levels. Banda and colleagues assessed capacity across a range of facility  
54 types; however, the sample consisted of only 22 facilities out of over 550 in the country(3,9,10).

55  
56  
57  
58 Overall service readiness scores depended partly on the total number of items comprising the  
59 score. When the number of required equipment and medications increased, the likelihood of  
60

service readiness decreased. For example, seven essential medications are required for heart failure treatment, and the overall readiness score is only 38% because only a small number of facilities have all seven components ready. In contrast, for acute epilepsy, which only required diazepam injection, the service readiness was 85%.

There are several limitations of this study. First, the HHFA survey does not include questions about the availability of the peak flow meter and micro nebulizer, which are essential for treating acute asthma. Data from the 2015 SPA survey about the availability of these two items suggest that we may have overestimated the service readiness for acute asthma. Second, we haven't conducted any imputation for missingness; future research is warranted in dealing with missing data through imputation. Third, apart from basic surgical care, the HHFA survey did not collect data regarding the majority of medical components required for inpatient management. Fourth, our study is limited by the HHFA survey methodology, as the survey only covered a subset of medicines and equipment in surveying permanent unavailability. Hence understanding of permanently unavailable items does not represent the full set of items required for NCDs management. In addition, the study by Banda et al.(10) of a smaller number of health facilities assessed other dimensions not included in the HHFA survey, such as whether facilities kept reliable records for NCD patients, and also supplemented the data with qualitative interviews that deepened the understanding of constraints. Last but not least, future studies should also investigate the Malawi health system's preparedness for emergency and critical care, which we did not include in this study.

Our findings have several implications for improving the service readiness of NCDs in Malawi. First, there is a gap between the readiness of PHCs and Secondary and Tertiary facilities. Our study suggests that PHCs require high-priority investments to improve NCD service availability. While health centres and rural/community hospitals may not be expected to perform complete diagnostics or treatment for complicated conditions, these primary care facilities are well-positioned to provide a comprehensive set of basic NCD services, given their accessibility. Second, targeting items on our list of limiting factors and permanently unavailable times presents an opportunity to update regulatory guidelines and achieve the most significant increases in service readiness for particular conditions. The efficient investment in NCD treatment potentially speeds up the medical service optimization in Malawi.

### Figures Legend:

|                                                                                                                                          |                                                                                                                                                                                                      |
|------------------------------------------------------------------------------------------------------------------------------------------|------------------------------------------------------------------------------------------------------------------------------------------------------------------------------------------------------|
| Figure 1: Service readiness and service functionality for each essential medical component at PHCs and Secondary and Tertiary facilities | The figure presents service readiness for 13 NCD conditions and illustrates the components contributing to the service readiness score calculation comparing PCH and higher-level health facilities. |
| Figure 2: NCD service readiness of the Malawi health system by level                                                                     | The figure presents the service readiness of 13 NCD conditions in the health facilities in Malawi. Figure 2 compares acute and chronic NCD service availability across the health service levels.    |

#### a. Contributorship statement

Contributors ZW, YC, and SA led the literature review and wrote the first draft of the manuscript. PT and JC provided data and supporting documents. ZW and LB analyzed the data, and MM replicated the estimates. ZW and MM produced the tables. YC and SA had the figures. MC, PT, EW, and DW contributed to conceiving the study, refining the methods, and interpreting the results. DW acquired funding for the research. YS led the study design, method development, and result interpretation. All the authors have made significant intellectual or practical contributions, critically revised the manuscript, and approved the final version of this paper.

b. Competing interests

We declare that non of the authors and coauthors have any financial or non-financial competing interests that may influence the analysis or the interpretation of this paper.

c. Funding

This work was supported by the Bergen Centre for Ethics and Priority Setting (BCEPS) with support from the Trond Mohn Foundation and the Norwegian Agency for Development Cooperation (NORAD), project number 874 789 542.

d. Data sharing statement

The data supporting this study's findings were obtained through the FMOH Malawi and are not available in a public, open-access repository.

e. Ethics approval statement

Not a human subject research.

Ethical approval exempt

**Acknowledgments:** The authors thank the Ministry of Health in Malawi. They are also grateful for all the valuable comments from editors and reviewers.

## References

1. World Health Organization. Noncommunicable disease [Internet]. Available from: <https://www.who.int/news-room/fact-sheets/detail/noncommunicable-diseases>
2. Leslie HH, Spiegelman D, Zhou X, Kruk ME. Service readiness of health facilities in Bangladesh, Haiti, Kenya, Malawi, Namibia, Nepal, Rwanda, Senegal, Uganda and the United Republic of Tanzania. *Bull World Health Organ*. 2017 Nov 1;95(11):738–48.
3. Moucheraud C. Service Readiness For Noncommunicable Diseases Was Low In Five Countries In 2013–15. *Health Aff (Millwood)*. 2018;37(8).
4. The World Bank. The World Bank Data - Malawi [Internet]. 2022. Available from: <https://data.worldbank.org/country/MW>
5. Kim ET, Singh K, Speizer IS, Angeles G, Weiss W. Availability of health facilities and utilization of maternal and newborn postnatal care in rural Malawi. *BMC Pregnancy Childbirth*. 2019 Dec 17;19(1):503.
6. Macarayan EK, Gage AD, Doubova SV, Guanais F, Lemango ET, Ndiaye Y, et al. Assessment of quality of primary care with facility surveys: a descriptive analysis in ten



- low-income and middle-income countries. *Lancet Glob Health*. 2018 Nov 1;6(11):e1176–85.
7. Wang Q, Brenner S, Kalmus O, Banda HT, De Allegri M. The economic burden of chronic non-communicable diseases in rural Malawi: an observational study. *BMC Health Serv Res*. 2016 Sep 1;16(1):457.
  8. Wroe EB, Kalanga N, Dunbar EL, Nazimera L, Price NF, Shah A, et al. Expanding access to non-communicable disease care in rural Malawi: outcomes from a retrospective cohort in an integrated NCD–HIV model. *BMJ Open*. 2020 Oct;10(10):e036836.
  9. Gupta N, Coates MM, Bekele A, Dupuy R, Fénelon DL, Gage AD, et al. Availability of equipment and medications for non-communicable diseases and injuries at public first-referral level hospitals: a cross-sectional analysis of service provision assessments in eight low-income countries. *BMJ Open*. 2020 Oct;10(10):e038842.
  10. Banda CK, Hosseinipour MC, Kumwenda J, Banda NPK, Lutala P, Makwero M, et al. Systems Capacity To Conduct Non-Communicable Disease Focused Implementation Research In The Malawian Health Sector: A National Needs Assessment [Internet]. In Review; 2021 May [cited 2021 Nov 23]. Available from: <https://www.researchsquare.com/article/rs-496152/v1>
  11. MOH, Malawi. Health Care System [Internet]. 2016 [cited 2022 Dec 12]. Available from: <https://www.health.gov.mw/index.php/2016-01-06-19-58-23/national-aids>
  12. Makwero MT. Delivery of primary health care in Malawi. *Afr J Prim Health Care Fam Med*. 2018;10(1):e1–3.
  13. World Health Organization. Malawi: Country Cooperation Strategy at a glance [Internet]. 2018. Available from: [http://apps.who.int/iris/bitstream/handle/10665/136935/ccsbrief\\_mwi\\_en.pdf;jsessionid=6622A9B77AC48437784A63B1C127472E?sequence=1](http://apps.who.int/iris/bitstream/handle/10665/136935/ccsbrief_mwi_en.pdf;jsessionid=6622A9B77AC48437784A63B1C127472E?sequence=1)
  14. Zeng W, Sun D, Mphwanthe H, Huan T, Nam JE, Saint-Firmin P, et al. The impact and cost-effectiveness of user fee exemption by contracting out essential health package services in Malawi. *BMJ Glob Health*. 2019 Apr;4(2):e001286.
  15. Government of Malawi. Malawi Millennium Development Goal Endline Report [Internet]. UNDP; 2015. Available from: [http://www.mw.undp.org/content/dam/malawi/docs/general/UNDP\\_MW\\_EDP\\_MDG\\_book\\_final.pdf](http://www.mw.undp.org/content/dam/malawi/docs/general/UNDP_MW_EDP_MDG_book_final.pdf)
  16. Shiroya V, Shawa N, Matanje B, Haloka J, Safary E, Nkhweliwa C, et al. Reorienting Primary Health Care Services for Non-Communicable Diseases: A Comparative Preparedness Assessment of Two Healthcare Networks in Malawi and Zambia. *Int J Environ Res Public Health*. 2021 May 10;18(9):5044.
  17. World Health Organization. Implementation tools: Package of Essential Noncommunicable (PEN) disease interventions for primary health care in low-resource settings [Internet]. Копенгаген: World Health Organization; 2013 [cited 2022 Oct 18]. (Сети фактических данных по вопросам здоровья; Сводный доклад №71). Available from: <https://apps.who.int/iris/handle/10665/341421>

18. World Health Organization. Declaration of Astana [Internet]. 2018 [cited 2022 Oct 18]. Available from: <https://www.who.int/docs/default-source/primary-health/declaration/gcphc-declaration.pdf>
19. The World Bank. Walking the Talk: Reimagining Primary Health Care After Covid-19. 2022 p. 225.
20. MOH, Malawi. The Essential Health Package (EHP) [Internet]. Ministry of the health Republic of Malawi. 2016 [cited 2022 Oct 25]. Available from: <https://www.health.gov.mw/index.php/essential-health-package>
21. MOH, Malawi. Malawi Standard Treatment Guidelines Essential Medicines List 2015.pdf [Internet]. 2015 [cited 2022 Dec 12]. Available from: [https://extranet.who.int/ncdccs/Data/MWI\\_D1\\_Malawi-Standard-Treatment-Guidelines-Essential-Medicines-List-2015.pdf](https://extranet.who.int/ncdccs/Data/MWI_D1_Malawi-Standard-Treatment-Guidelines-Essential-Medicines-List-2015.pdf)
22. World Health Organization. 2008-2013 action plan for the global strategy for the prevention and control of noncommunicable diseases : prevent and control cardiovascular diseases, cancers, chronic respiratory diseases and diabetes. Plan Action 2008-2013 Pour Strat Mond Lutte Contre Mal Non Transm. 2009;42.
23. World Health Organization. Prevention and control of noncommunicable diseases: guidelines for primary health care in low resource settings [Internet]. Geneva: World Health Organization; 2012 [cited 2022 Dec 12]. 68 p. Available from: <https://apps.who.int/iris/handle/10665/76173>
24. World Health Organization. Global action plan for the prevention and control of noncommunicable diseases 2013-2020. 2013.

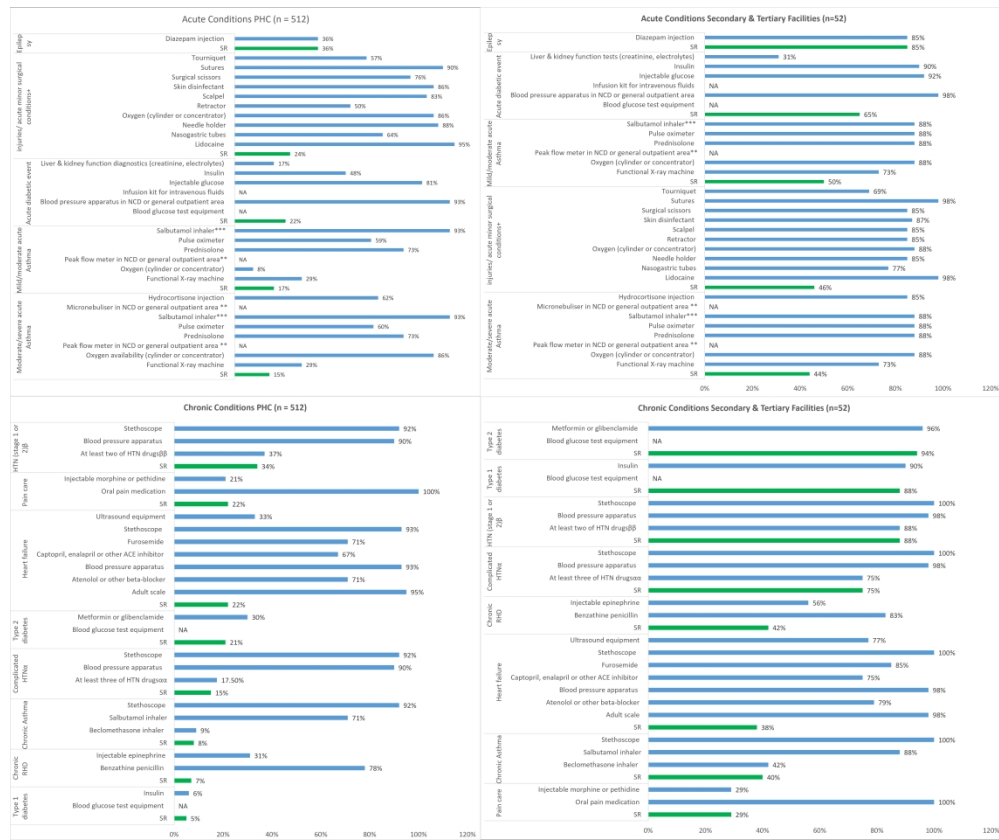

Figure 1: Service readiness and service functionality for each essential medical component at PHCs and Secondary and Tertiary facilities

1243x1035mm (130 x 130 DPI)

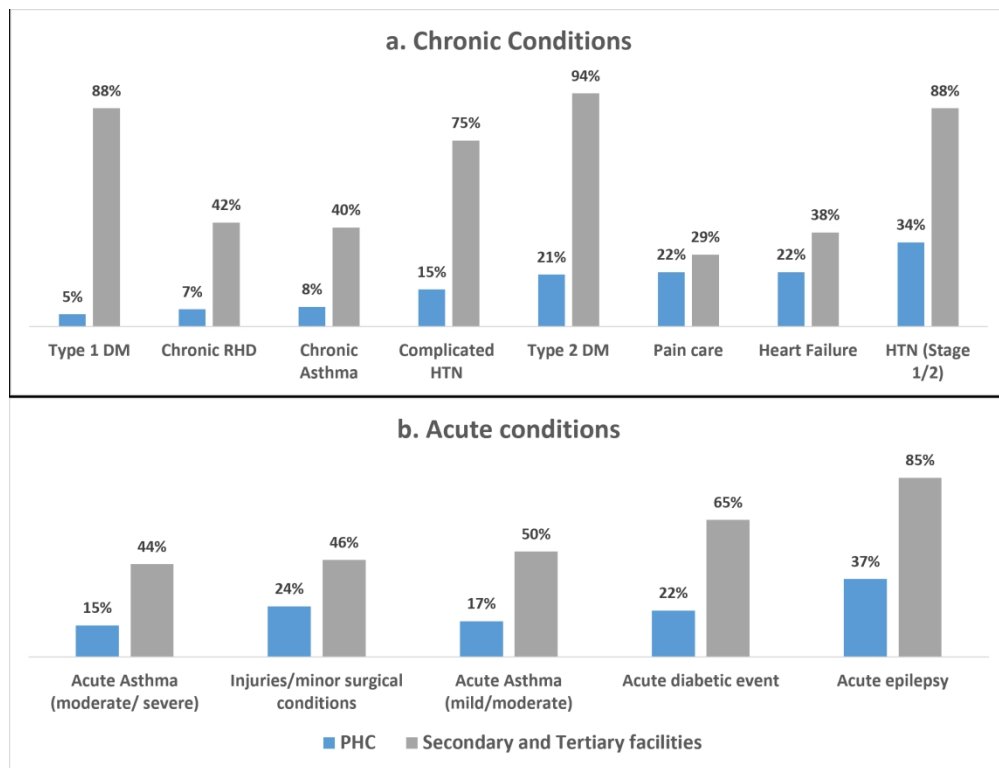

Figure 2: NCD service readiness of the Malawi health system by level

512x390mm (130 x 130 DPI)

Appendix Table 1: Service expected at each level

| Condition                                                     | Primary Health Care |                           | Secondary and Tertiary facilities |                   |
|---------------------------------------------------------------|---------------------|---------------------------|-----------------------------------|-------------------|
|                                                               | Health Centers      | Rural/Community Hospitals | District Hospitals                | Central Hospitals |
| <b>Chronic conditions</b>                                     |                     |                           |                                   |                   |
| Chronic asthma                                                | x                   | x                         | x                                 | x                 |
| Hypertension (stage 1 or 2)                                   | x                   | x                         | x                                 | x                 |
| Type 1 diabetes                                               | x                   | x                         | x                                 | x                 |
| Type 2 diabetes                                               | x                   | x                         | x                                 | x                 |
| Oral pain care                                                | x                   | x                         | x                                 | x                 |
| Injectable pain care                                          |                     | x                         | x                                 | x                 |
| Hypertension requiring three or more antihypertensive classes | x                   | x                         | x                                 | x                 |
| Heart failure                                                 |                     | x                         | x                                 | x                 |
| Chronic RHD                                                   |                     | x                         | x                                 | x                 |
| <b>Acute conditions</b>                                       |                     |                           |                                   |                   |
| Mild/moderate acute Asthma                                    |                     | x                         | x                                 | x                 |
| Moderate/severe acute Asthma                                  |                     | x                         | x                                 | x                 |
| Acute diabetes                                                |                     | x                         | x                                 | x                 |
| Acute epilepsy                                                |                     | x                         | x                                 | x                 |
| injuries/ acute minor Surgical conditions+                    |                     | x                         | x                                 | x                 |

Appendix Table 2: Service Indicators

| Conditions                   | Essential equipment and medications               | Availability Indicators                                                                    | Functionality Indicators                                                        | “Never Available” Data Availability | Facility Types Surveyed* |
|------------------------------|---------------------------------------------------|--------------------------------------------------------------------------------------------|---------------------------------------------------------------------------------|-------------------------------------|--------------------------|
| Mild/moderate acute Asthma   | Functional X-ray machine                          | T125_01 (Y = 1,2,3; N = 4,NA)                                                              | T125_01 (Y = 1; N = 2,4,NA)                                                     | No Data                             | 1,2,3                    |
|                              | Oxygen availability (cylinder or concentrator)    | HH101_22 (Y = “Yes”, N = “No”, NA) <b>OR</b> HH101_23 (cylinder) (Y = “Yes”, N = “No”, NA) | HH101A22 (Y = “Yes”, N = “No”, NA) <b>OR</b> HH101A23 (Y = “Yes”, N = “No”, NA) | No Data                             | 1,2,3,4                  |
|                              | Peak flow meter in NCD or general outpatient area | No Data (used SPA data for estimation)                                                     | No Data                                                                         | No Data                             | No Data                  |
|                              | Prednisolone                                      | U103_10 (Y = 1, 2; N = 3,4,5,NA)                                                           | U103_10 (Y = 1; N = 2,3,4,5,NA)                                                 | U103_10 (Y = 1; N = 2,3,4,5,NA)     | 1,2,3,4                  |
|                              | Pulse oximeter                                    | HH101_8 (Y = “Yes”, N = “No”, NA)                                                          | HH101A8 (Y = “Yes”, N = “No”, NA)                                               | No Data                             | 1,2,3,4                  |
|                              | Salbutamol inhaler                                | U103_21 (Y = 1,2; N = 3,4,5,NA)                                                            | U103_21 (Y = 1; N = 2,3,4,5,NA)                                                 | U103_21 (Y = 1; N = 2,3,4,5,NA)     | 1,2,3,4                  |
| Moderate/severe acute Asthma | Functional X-ray machine                          | T125_01 (Y = 1,2,3; N = 4,NA)                                                              | T125_01 (Y = 1; N = 2,4,NA)                                                     | No data                             | 1,2,3                    |
|                              | Oxygen availability                               | HH101_22 (Y = “Yes”, N = “No”, NA)                                                         | HH101A22 (Y = “Yes”, N = “No”, NA)                                              | No data                             | 1,2,3,4                  |

|                |                                                            |                                                                   |                                                        |                                 |         |
|----------------|------------------------------------------------------------|-------------------------------------------------------------------|--------------------------------------------------------|---------------------------------|---------|
|                | (cylinder or concentrator)                                 | “No”, NA) <b>OR</b> HH101_23 (cylinder) (Y = “Yes”, N = “No”, NA) | “No”, NA) <b>OR</b> HH101A23 (Y = “Yes”, N = “No”, NA) |                                 |         |
|                | Peak flow meter in NCD or general outpatient area          | No Data (used SPA data for estimation)                            | No data                                                | No data                         | No data |
|                | Prednisolone                                               | U103_10 (Y = 1, 2; N = 3,4,5,NA)                                  | U103_10 (Y = 1; N = 2,3,4,5,NA)                        | U103_10 (Y = 1; N = 2,3,4,5,NA) | 1,2,3,4 |
|                | Pulse oximeter                                             | HH101_8 (Y = “Yes”, N = “No”, NA)                                 | HH101A8 (Y = “Yes”, N = “No”, NA)                      | No data                         | 1,2,3,4 |
|                | Salbutamol inhaler                                         | U103_21 (Y = 1,2; N = 3,4,5,NA)                                   | U103_21 (Y = 1; N = 2,3,4,5,NA)                        | U103_21 (Y = 1; N = 2,3,4,5,NA) | 1,2,3,4 |
|                | Micro nebulizer in NCD or general outpatient area          | No Data (used SPA data for estimation)                            | No Data                                                | No Data                         | No Data |
|                | Hydrocortisone injection                                   | U103_11 (Y = 1,2; N = 3,4,5,NA)                                   | U103_11 (Y = 1; N = 2,3,4,5,NA)                        | U103_11 (Y = 1; N = 2,3,4,5,NA) | 1,2,3,4 |
| Acute diabetes | Blood glucose test equipment                               | T105_01 (Y = 1,2; N = 3,NA)                                       | No Data                                                | No Data                         | 1,2,3,4 |
|                | Blood pressure apparatus in NCD or general outpatient area | HH101_15 (Y = “Yes, N = “No”,NA)                                  | HH101A15 (Y = “Yes”, N = “No”,NA)                      | No Data                         | 1,2,3,4 |

|                                            |                                                                  |                                                                                                           |                                                                           |                                                                            |                                               |
|--------------------------------------------|------------------------------------------------------------------|-----------------------------------------------------------------------------------------------------------|---------------------------------------------------------------------------|----------------------------------------------------------------------------|-----------------------------------------------|
|                                            | Infusion kit for intravenous fluids                              | M116_161 (Y = "Yes", N = "No")                                                                            | No Data                                                                   | No Data                                                                    | 1,2,3,4                                       |
|                                            | Injectable glucose                                               | U103_03 (Y = 1,2; N = 3,4,5,NA)                                                                           | U103_03 (Y = 1; N = 2,3,4,5,NA)                                           | U103_03 (Y = 1; N = 2,3,4,5,NA)                                            | 1,2,3,4                                       |
|                                            | Insulin                                                          | U103_02 (Y = 1,2; N = 3,4,5,NA)                                                                           | U103_02 (Y = 1; N = 2,3,4,5,NA)                                           | U103_02 (Y = 1; N = 2,3,4,5,NA)                                            | 1,2,3,4                                       |
|                                            | Liver and kidney function diagnostics (creatinine, electrolytes) | T113_03 (Y = 1,2; N = 3,NA) <b>Or</b> T122_01 (Y = 1,2; N = 3,NA) <b>Or</b> T123_01 (Y = 1,2,3; N = 4,NA) | T123_01 (Y = 1; N = 2,3,4,NA)                                             | T123_01 (Y = 1; N = 2,3,4,NA)                                              | 1,2,3                                         |
| Acute epilepsy                             | Diazepam injection                                               | U125_16 (Y = 1,2; N = 3,4,5,NA) <b>or</b> U126_05 (Y = 1,2; N = 3,4,5,NA)                                 | U125_16 (Y = 1; N = 2,3,4,5,NA) <b>or</b> U126_05 (Y = 1; N = 2,3,4,5,NA) | U125_16 (Y = 1; N = 2,3,4,5,NA) <b>And</b> U126_05 (Y = 1; N = 2,3,4,5,NA) | All facility types AND M103. Yes.Contains (8) |
| Injuries/ acute minor surgical conditions+ | Lidocaine in minor surgical area                                 | U125_12 (Y = 1,2; N = 3,4,5,NA)                                                                           | U125_12 (Y = 1; N = 2,3,4,5,NA)                                           | U125_12 (Y = 1; N = 2,3,4,5,NA)                                            | 1,2,3,4                                       |
|                                            | Nasogastric tubes in minor surgical area                         | RR115_7 (Y = "Yes", N = "No", NA)                                                                         | RR115A7 (Y = "Yes", N = "No", NA)                                         | No Data                                                                    | 1,2,3                                         |
|                                            | Needle holder in minor surgical area                             | RR115_3 (Y = "Yes", N = "No", NA)                                                                         | RR115A3 (Y = "Yes", N = "No", NA)                                         | No Data                                                                    | 1,2,3                                         |



|                |                                                              |                                                                                                    |                                                                                       |                                     |                         |
|----------------|--------------------------------------------------------------|----------------------------------------------------------------------------------------------------|---------------------------------------------------------------------------------------|-------------------------------------|-------------------------|
|                | Oxygen availability (cylinder or concentrator)               | HH101_2<br>2 (Y = "Yes", N = "No", NA) <b>OR</b> HH101_2<br>3 (cylinder) (Y = "Yes", N = "No", NA) | HH101A22<br>(Y = "Yes", N = "No", NA) <b>OR</b> HH101A23<br>(Y = "Yes", N = "No", NA) | No Data                             | 1,2,3,4                 |
|                | Retractor in minor surgical area                             | RR115_5<br>(Y = "Yes", N = "No", NA))                                                              | RR115A5<br>(Y = "Yes", N = "No", NA))                                                 | No Data                             | 1,2,3                   |
|                | Scalpel in minor surgical area                               | RR115_4<br>(Y = "Yes", N = "No", NA))                                                              | RR115A4<br>(Y = "Yes", N = "No", NA))                                                 | No Data                             | 1,2,3                   |
|                | Skin disinfectant in minor surgical area                     | U125_05<br>(Y = 1,2; N = 3,4,5,NA)                                                                 | U125_05<br>(Y = 1, N = 2,3,4,5,NA)                                                    | U125_05<br>=5                       | 1,2,3,4                 |
|                | Surgical scissors in minor surgical area                     | RR115_6<br>(Y = "Yes", N = "No", NA)                                                               | RR115A6<br>(Y = "Yes", N = "No", NA)                                                  | No Data                             | 1,2,3                   |
|                | Sutures in minor surgical area                               | U125_09<br>(Y = 1,2; N = 3,4,5)                                                                    | U125_09<br>(Y = 1; N = 2,3,4,5)                                                       | U125_09<br>=5                       | 1,2,3,4                 |
|                | Tourniquet in minor surgical area                            | RR115_8<br>(Y = "Yes", N = "No", NA)                                                               | RR115A8<br>(Y = "Yes", N = "No", NA)                                                  | No Data                             | 1,2,3                   |
| Disease        | Availability of complete essential equipment and medications | Availability Indicators                                                                            | Functionality Indicators                                                              | "Never Available" Data Availability | Facility Types Surveyed |
| Chronic asthma | Beclomethasone inhaler                                       | U103_09<br>(Y = 1,2; N = 3,4,5,NA)                                                                 | U103_09<br>(Y = 1; N = 2,3,4,5,NA)                                                    | U103_09<br>=5                       | 1,2,3,4                 |

|                                                               |                                                                               |                                                         |                                                          |                                                             |         |
|---------------------------------------------------------------|-------------------------------------------------------------------------------|---------------------------------------------------------|----------------------------------------------------------|-------------------------------------------------------------|---------|
|                                                               |                                                                               |                                                         | 2,3,4,5,NA)                                              |                                                             |         |
|                                                               | Salbutamol inhaler                                                            | U103_21 (Y = 1,2; N = 3,4,5,NA)                         | U103_21 (Y = 1; N = 2,3,4,5,NA)                          | U103_21 ==5                                                 | 1,2,3,4 |
|                                                               | Stethoscope                                                                   | HH101_13 (Y = "Yes", N = "No", NA)                      | HH101A3 (Y = "Yes", N = "No", NA)                        | No Data                                                     | 1,2,3,4 |
|                                                               | At least two of: calcium channel blocker, ACE inhibitor, thiazide, atenolol   | U103_04, U103_05, U103_06, U103_07 (Y = 1,2; N = 3,4,5) | U103_04, U103_05, U103_06, U103_07 (Y = 1; N = 2, 3,4,5) | U103_04 ==5 AND U103_05 ==5 AND U103_06 ==5 AND U103_07 ==5 | 1,2,3,4 |
| Hypertension (stage 1 or 2)                                   | Blood pressure apparatus                                                      | HH101__15 (Y = "Yes, N = "No",NA)                       | HH101A15 (Y = "Yes", N = "No",NA)                        | No data                                                     | 1,2,3,4 |
|                                                               | Stethoscope                                                                   | HH101_13 (Y = "Yes", N = "No", NA)                      | HH101A3 (Y = "Yes", N = "No", NA)                        | No data                                                     | 1,2,3,4 |
|                                                               | At least three of: calcium channel blocker, ACE inhibitor, thiazide, atenolol | U103_04, U103_05, U103_06, U103_07 (Y = 1,2; N = 3,4,5) | U103_04, U103_05, U103_06, U103_07 (Y = 1; N = 2, 3,4,5) | U103_04 ==5 AND U103_05 ==5 AND U103_06 ==5 AND U103_07 ==5 | 1,2,3,4 |
| Hypertension requiring three or more antihypertensive classes | Blood pressure apparatus                                                      | HH101__15 (Y = "Yes, N = "No",NA)                       | HH101A15 (Y = "Yes", N = "No",NA)                        | No data                                                     | 1,2,3,4 |
|                                                               | Stethoscope                                                                   | HH101_13 (Y = "Yes", N = "No", NA)                      | HH101A3 (Y = "Yes", N = "No", NA)                        | No data                                                     | 1,2,3,4 |

|               |                                                      |                                                                                      |                                                                                      |                                    |         |
|---------------|------------------------------------------------------|--------------------------------------------------------------------------------------|--------------------------------------------------------------------------------------|------------------------------------|---------|
|               | Adult scale                                          | HH101_1<br>(Y =<br>"Yes", N =<br>"No", NA)                                           | HH101A1<br>(Y =<br>"Yes", N =<br>"No", NA)                                           | No Data                            | 1,2,3,4 |
|               | Atenolol or<br>other beta-<br>blocker                | U103_06<br>(Y = 1,2; N =<br>3,4,5,NA)                                                | U103_06<br>(Y = 1; N =<br>2,3,4,5,NA)                                                | U103_06<br>=5                      | 1,2,3,4 |
|               | Blood pressure<br>apparatus                          | HH101__1<br>5 (Y =<br>"Yes, N =<br>"No",NA)                                          | HH101A15<br>(Y =<br>"Yes", N =<br>"No",NA)                                           | No data                            | 1,2,3,4 |
| Heart failure | Captopril,<br>enalapril or<br>other ACE<br>inhibitor | U103_04<br>(Y = 1,2; N =<br>3,4,5,NA)                                                | U103_04<br>(Y = 1; N =<br>2,3,4,5,NA)                                                | U103_04<br>=5                      | 1,2,3,4 |
|               | Furosemide                                           | U103_13<br>(Y = 1,2; N =<br>3,4,5,NA)                                                | U103_13<br>(Y = 1; N =<br>2,3,4,5,NA)                                                | U103_13<br>=5                      | 1,2,3,4 |
|               | Stethoscope                                          | HH101_13<br>(Y =<br>"Yes", N =<br>"No", NA)                                          | HH101A3<br>(Y =<br>"Yes", N =<br>"No", NA)                                           | No data                            | 1,2,3,4 |
|               | Ultrasound<br>equipment                              | T125_02<br>(Y = 1,2,3;<br>N = 4,NA)                                                  | T125_02<br>(Y = 1; N =<br>2,3,4,NA)                                                  | No Data                            | 1,2,3   |
|               | Benzathine<br>penicillin                             | U106_18<br>(Y = 1,2; N =<br>3,4,5,NA)                                                | U106_18<br>(Y = 1; N =<br>2,3,4,5,NA)                                                | U106_18<br>=5                      | 1,2,3,4 |
| chronic RHD   | Injectable<br>epinephrine                            | U125_20<br>(Y = 1,2; N =<br>3,4,5,NA)<br>OR<br>U103_12<br>(Y = 1,2; N =<br>3,4,5,NA) | U125_20<br>(Y = 1; N =<br>2,3,4,5,NA)<br>OR<br>U103_12<br>(Y = 1; N =<br>2,3,4,5,NA) | U125_20<br>=5 AND<br>U103_12<br>=5 | 1,2,3   |

|                 |                                                                      |                                                                                      |                                                                                      |                                                                              |         |
|-----------------|----------------------------------------------------------------------|--------------------------------------------------------------------------------------|--------------------------------------------------------------------------------------|------------------------------------------------------------------------------|---------|
|                 | Blood glucose test equipment                                         | T105_01<br>(Y = 1,2; N = 3,NA)                                                       | No data                                                                              | No data                                                                      | 1,2,3,4 |
| Type 1 diabetes | Insulin                                                              | U103_02<br>(Y = 1,2; N = 3,4,5,NA)                                                   | U103_02<br>(Y = 1; N = 2,3,4,5,NA)                                                   | U103_02<br>=5                                                                | 1,2,3,4 |
|                 | Blood glucose test equipment                                         | T105_01<br>(Y = 1,2; N = 3,NA)                                                       | No data                                                                              | No data                                                                      | 1,2,3,4 |
| Type 2 diabetes | Metformin or glibenclamide                                           | U103_01<br>(Y = 1,2; N = 3,4,5,NA)<br>OR<br>U103_14<br>(Y = 1,2; N = 3,4,5,NA)       | U103_01<br>(Y = 1; N = 2,3,4,5,NA)<br>OR<br>U103_14<br>(Y = 1; N = 2,3,4,5,NA)       | U103_01<br>=5<br>AND<br>U103_14<br>=5                                        | 1,2,3,4 |
|                 | Injectable morphine or pethidine                                     | U127_07<br>(Y = 1,2; N = 3,4,5,NA)                                                   | U127_07<br>(Y = 1; N = 2,3,4,5,NA)                                                   | U127_07<br>=5                                                                | 1,2,3   |
| Pain care       | Oral pain medication (paracetamol, ibuprofen, aspirin or diclofenac) | U103_20<br>OR<br>U103_17<br>OR<br>U111_08<br>OR<br>U103_08;<br>Y = 1,2; N = 3,4,5,NA | U103_20<br>OR<br>U103_17<br>OR<br>U111_08<br>OR<br>U103_08;<br>Y = 1; N = 2,3,4,5,NA | U103_20<br>=5 AND<br>U103_17<br>=5 AND<br>U111_08<br>=5 AND<br>U103_08<br>=5 | 1,2,3,4 |

\* Facility types: 1 = central hospitals, 2 = district hospitals, 3 = rural/community hospitals, 4 = health centers

Appendix Table 3: nebulizer and peak-flow meter availability from SPA data, 2015

| Medical component | Facility type              | Total facilities | Facilities with availability | % availability |
|-------------------|----------------------------|------------------|------------------------------|----------------|
| Nebulizer         | Central hospital           | 4                | 3                            | 75.00          |
|                   | District hospital          | 24               | 6                            | 25.00          |
|                   | Other hospital             | 47               | 28                           | 59.25          |
|                   | Rural / community hospital | 41               | 9                            | 21.95          |
|                   | Health center              | 473              | 24                           | 5.07           |
|                   | Clinic                     | 317              | 38                           | 12.02          |
|                   | Health post                | 20               | NA                           | NA             |
|                   | Maternity                  | 4                | NA                           | NA             |
|                   | Dispensary                 | 47               | 1                            | 2.00           |
|                   | Total                      |                  | 977                          | 109            |
| Peak-flow meter   | Central hospital           | 4                | 1                            | 25.00          |
|                   | District hospital          | 24               | 1                            | 4.17           |
|                   | Other hospital             | 47               | 13                           | 27.58          |
|                   | Rural / community hospital | 41               | 2                            | 4.88           |
|                   | Health center              | 473              | 8                            | 1.68           |
|                   | Clinic                     | 317              | 12                           | 3.79           |
|                   | Health post                | 20               | NA                           | 0.00           |
|                   | Maternity                  | 4                | NA                           | 0.00           |
|                   | Dispensary                 | 47               | NA                           | 0.00           |
|                   | Total                      |                  | 977                          | 37             |

Appendix Table 4: Missingness in HHFA data

|                           |                                  | Health Center (n=471)              |                                     | Rural Community Hospital (n=41)    |                                     | District Hospital (n=48)           |                                     | Central Hospital (n=4)             |                                     |
|---------------------------|----------------------------------|------------------------------------|-------------------------------------|------------------------------------|-------------------------------------|------------------------------------|-------------------------------------|------------------------------------|-------------------------------------|
| Condition                 | Essential Equipment & Medication | Missing data: Available Components | Missing data: Functional Components | Missing data: Available Components | Missing data: Functional Components | Missing data: Available Components | Missing data: Functional Components | Missing data: Available Components | Missing data: Functional Components |
| <b>Chronic Conditions</b> |                                  |                                    |                                     |                                    |                                     |                                    |                                     |                                    |                                     |
| Chronic asthma            | Beclomethasone                   | 0%                                 | 0%                                  | 0%                                 | 0%                                  | 0%                                 | 0%                                  | 0%                                 | 0%                                  |

|                             |                                                                             |    |      |    |      |    |      |    |      |
|-----------------------------|-----------------------------------------------------------------------------|----|------|----|------|----|------|----|------|
|                             | inhaler                                                                     |    |      |    |      |    |      |    |      |
|                             | Salbutamol inhaler                                                          | 0% | 0%   | 0% | 0%   | 0% | 0%   | 0% | 0%   |
|                             | Stethoscope                                                                 | 1% | 1%   | 0% | 0%   | 0% | 0%   | 0% | 0%   |
| Hypertension (stage 1 or 2) | At least two of: calcium channel blocker, ACE inhibitor, thiazide, atenolol | 0% | 0%   | 0% | 0%   | 0% | 0%   | 0% | 0%   |
|                             | Blood pressure apparatus                                                    | 1% | 7%   | 0% | 0%   | 0% | 0%   | 0% | 0%   |
|                             | Stethoscope                                                                 | 1% | 1%   | 0% | 0%   | 0% | 0%   | 0% | 0%   |
| Type 1 diabetes             | Blood glucose test equipment                                                | 2% | 100% | 0% | 100% | 0% | 100% | 0% | 100% |
|                             | Insulin                                                                     | 0% | 0%   | 0% | 0%   | 0% | 0%   | 0% | 0%   |
| Type 2 diabetes             | Blood glucose test equipment                                                | 2% | 100% | 0% | 100% | 0% | 100% | 0% | 100% |
|                             | Metformin or glibenclamide                                                  | 0% | 0%   | 0% | 0%   | 0% | 0%   | 0% | 0%   |
| Pain care                   | Oral pain                                                                   | 0% | 0%   | 0% | 0%   | 0% | 0%   | 0% | 0%   |

|                                                               |                                                                               |     |     |     |     |     |     |    |    |
|---------------------------------------------------------------|-------------------------------------------------------------------------------|-----|-----|-----|-----|-----|-----|----|----|
|                                                               | medication                                                                    |     |     |     |     |     |     |    |    |
|                                                               | Injectable morphine or pethidine                                              | 99% | 99% | 15% | 15% | 17% | 17% | 0% | 0% |
| Hypertension requiring three or more antihypertensive classes | At least three of: calcium channel blocker, ACE inhibitor, thiazide, atenolol | 0%  | 0%  | 0%  | 0%  | 0%  | 0%  | 0% | 0% |
|                                                               | Blood pressure apparatus                                                      | 1%  | 7%  | 0%  | 0%  | 0%  | 0%  | 0% | 0% |
|                                                               | Stethoscope                                                                   | 1%  | 1%  | 0%  | 0%  | 0%  | 0%  | 0% | 0% |
| Heart failure                                                 | Adult scale                                                                   | 1%  | 7%  | 0%  | 2%  | 0%  | 2%  | 0% | 0% |
|                                                               | Atenolol or other beta-blocker                                                | 0%  | 0%  | 0%  | 0%  | 0%  | 0%  | 0% | 0% |
|                                                               | Blood pressure apparatus                                                      | 1%  | 7%  | 0%  | 0%  | 0%  | 0%  | 0% | 0% |
|                                                               | Captopril, enalapril or other ACE inhibitor                                   | 0%  | 0%  | 0%  | 0%  | 0%  | 0%  | 0% | 0% |
|                                                               |                                                                               |     |     |     |     |     |     |    |    |

|                                      |                                                                      |      |      |      |      |      |      |      |      |
|--------------------------------------|----------------------------------------------------------------------|------|------|------|------|------|------|------|------|
|                                      | r                                                                    |      |      |      |      |      |      |      |      |
|                                      | Furose<br>mide                                                       | 0%   | 0%   | 0%   | 0%   | 0%   | 0%   | 0%   | 0%   |
|                                      | Stetho<br>cope                                                       | 1%   | 1%   | 0%   | 0%   | 0%   | 0%   | 0%   | 0%   |
|                                      | Ultraso<br>und<br>equipm<br>ent                                      | 99%  | 99%  | 15%  | 15%  | 17%  | 17%  | 0%   | 0%   |
| chronic<br>RHD                       | Benzath<br>ine<br>penicilli<br>n                                     | 0%   | 0%   | 0%   | 0%   | 0%   | 0%   | 0%   | 0%   |
|                                      | Injectab<br>le<br>epineph<br>rine                                    | 0%   | 0%   | 0%   | 0%   | 0%   | 0%   | 0%   | 0%   |
| <b>Acute Conditions</b>              |                                                                      |      |      |      |      |      |      |      |      |
| Mild/m<br>oderate<br>acute<br>Asthma | Funcio<br>nal X-<br>ray<br>machine                                   | 99%  | 99%  | 15%  | 15%  | 17%  | 17%  | 0%   | 0%   |
|                                      | Oxygen<br>availabi<br>lity<br>(cylinde<br>r or<br>concent<br>rator)  | 1%   | 75%  | 0%   | 12%  | 0%   | 13%  | 0%   | 0%   |
|                                      | Peak<br>flow<br>meter in<br>NCD or<br>general<br>outpatie<br>nt area | 100% | 100% | 100% | 100% | 100% | 100% | 100% | 100% |
|                                      | Prednis<br>olone                                                     | 0%   | 0%   | 0%   | 0%   | 0%   | 0%   | 0%   | 0%   |
|                                      | Pulse<br>oximete<br>r                                                | 2%   | 84%  | 2%   | 8%   | 2%   | 8%   | 0%   | 0%   |



|                              |                                                   |      |      |      |      |      |      |      |      |
|------------------------------|---------------------------------------------------|------|------|------|------|------|------|------|------|
|                              | Salbutamol inhaler                                | 0%   | 0%   | 0%   | 0%   | 0%   | 0%   | 0%   | 0%   |
|                              | Functional X-ray machine                          | 99%  | 99%  | 15%  | 15%  | 17%  | 17%  | 0%   | 0%   |
|                              | Oxygen availability (cylinder or concentrator)    | 1%   | 75%  | 0%   | 12%  | 0%   | 13%  | 0%   | 0%   |
|                              | Peak flow meter in NCD or general outpatient area | 100% | 100% | 100% | 100% | 100% | 100% | 100% | 100% |
|                              | Prednisolone                                      | 0%   | 0%   | 0%   | 0%   | 0%   | 0%   | 0%   | 0%   |
|                              | Pulse oximeter                                    | 2%   | 84%  | 2%   | 8%   | 2%   | 8%   | 0%   | 0%   |
|                              | Salbutamol inhaler                                | 0%   | 0%   | 0%   | 0%   | 0%   | 0%   | 0%   | 0%   |
|                              | Micro nebulizer in NCD or general outpatient area | 100% | 100% | 100% | 100% | 100% | 100% | 100% | 100% |
| Moderate/severe acute Asthma | Hydrocortisone injection                          | 0%   | 0%   | 0%   | 0%   | 0%   | 0%   | 0%   | 0%   |
| Acute diabete                | Blood glucose                                     | 2%   | 100% | 0%   | 100% | 0%   | 100% | 0%   | 100% |

|                                             |                                                                  |     |      |     |      |     |      |    |      |
|---------------------------------------------|------------------------------------------------------------------|-----|------|-----|------|-----|------|----|------|
| s                                           | test equipment                                                   |     |      |     |      |     |      |    |      |
|                                             | Blood pressure apparatus in NCD or general outpatient area       | 1%  | 7%   | 0%  | 0%   | 0%  | 0%   | 0% | 0%   |
|                                             | Infusion kit for intravenous fluids                              | 11% | 100% | 6%  | 100% | 6%  | 100% | 0% | 100% |
|                                             | Injectable glucose                                               | 0%  | 0%   | 0%  | 0%   | 0%  | 0%   | 0% | 0%   |
|                                             | Insulin                                                          | 0%  | 0%   | 0%  | 0%   | 0%  | 0%   | 0% | 0%   |
|                                             | Liver and kidney function diagnostics (creatinine, electrolytes) | 97% | 97%  | 6%  | 6%   | 6%  | 6%   | 0% | 0%   |
| Acute epilepsy                              | Diazepam injection                                               | 99% | 99%  | 15% | 15%  | 17% | 17%  | 0% | 0%   |
| Injuries / acute minor surgical conditions+ | Lidocaine in minor surgical area                                 | 0%  | 0%   | 0%  | 0%   | 0%  | 0%   | 0% | 0%   |
|                                             | Nasogastric tubes in                                             | 99% | 99%  | 13% | 23%  | 15% | 25%  | 0% | 0%   |

|    |          |     |     |     |     |     |     |    |    |
|----|----------|-----|-----|-----|-----|-----|-----|----|----|
| 1  |          |     |     |     |     |     |     |    |    |
| 2  |          |     |     |     |     |     |     |    |    |
| 3  |          |     |     |     |     |     |     |    |    |
| 4  | minor    |     |     |     |     |     |     |    |    |
| 5  | surgical |     |     |     |     |     |     |    |    |
| 6  | area     |     |     |     |     |     |     |    |    |
| 7  |          |     |     |     |     |     |     |    |    |
| 8  | Needle   |     |     |     |     |     |     |    |    |
| 9  | holder   |     |     |     |     |     |     |    |    |
| 10 | in       |     |     |     |     |     |     |    |    |
| 11 | minor    |     |     |     |     |     |     |    |    |
| 12 | surgical |     |     |     |     |     |     |    |    |
| 13 | area     | 99% | 99% | 13% | 15% | 15% | 17% | 0% | 0% |
| 14 |          |     |     |     |     |     |     |    |    |
| 15 | Oxygen   |     |     |     |     |     |     |    |    |
| 16 | availabi |     |     |     |     |     |     |    |    |
| 17 | lity     |     |     |     |     |     |     |    |    |
| 18 | (cylinde |     |     |     |     |     |     |    |    |
| 19 | r or     |     |     |     |     |     |     |    |    |
| 20 | concent  |     |     |     |     |     |     |    |    |
| 21 | rator)   | 1%  | 75% | 0%  | 12% | 0%  | 13% | 0% | 0% |
| 22 |          |     |     |     |     |     |     |    |    |
| 23 | Retracto |     |     |     |     |     |     |    |    |
| 24 | r in     |     |     |     |     |     |     |    |    |
| 25 | minor    |     |     |     |     |     |     |    |    |
| 26 | surgical |     |     |     |     |     |     |    |    |
| 27 | area     | 99% | 99% | 13% | 15% | 15% | 17% | 0% | 0% |
| 28 |          |     |     |     |     |     |     |    |    |
| 29 | Scalpel  |     |     |     |     |     |     |    |    |
| 30 | in       |     |     |     |     |     |     |    |    |
| 31 | minor    |     |     |     |     |     |     |    |    |
| 32 | surgical |     |     |     |     |     |     |    |    |
| 33 | area     | 99% | 99% | 13% | 15% | 15% | 17% | 0% | 0% |
| 34 |          |     |     |     |     |     |     |    |    |
| 35 | Skin     |     |     |     |     |     |     |    |    |
| 36 | disinfec |     |     |     |     |     |     |    |    |
| 37 | tant in  |     |     |     |     |     |     |    |    |
| 38 | minor    |     |     |     |     |     |     |    |    |
| 39 | surgical |     |     |     |     |     |     |    |    |
| 40 | area     | 0%  | 0%  | 0%  | 0%  | 0%  | 0%  | 0% | 0% |
| 41 |          |     |     |     |     |     |     |    |    |
| 42 | Surgical |     |     |     |     |     |     |    |    |
| 43 | scissors |     |     |     |     |     |     |    |    |
| 44 | in       |     |     |     |     |     |     |    |    |
| 45 | minor    |     |     |     |     |     |     |    |    |
| 46 | surgical |     |     |     |     |     |     |    |    |
| 47 | area     | 99% | 99% | 13% | 15% | 15% | 17% | 0% | 0% |
| 48 |          |     |     |     |     |     |     |    |    |
| 49 | Sutures  |     |     |     |     |     |     |    |    |
| 50 | in       |     |     |     |     |     |     |    |    |
| 51 | minor    |     |     |     |     |     |     |    |    |
| 52 | surgical |     |     |     |     |     |     |    |    |
| 53 | area     | 0%  | 0%  | 0%  | 0%  | 0%  | 0%  | 0% | 0% |
| 54 |          |     |     |     |     |     |     |    |    |
| 55 |          |     |     |     |     |     |     |    |    |
| 56 |          |     |     |     |     |     |     |    |    |
| 57 |          |     |     |     |     |     |     |    |    |
| 58 |          |     |     |     |     |     |     |    |    |
| 59 |          |     |     |     |     |     |     |    |    |
| 60 |          |     |     |     |     |     |     |    |    |

|  |                                   |     |     |     |     |     |     |    |     |
|--|-----------------------------------|-----|-----|-----|-----|-----|-----|----|-----|
|  | Tourniquet in minor surgical area | 99% | 99% | 13% | 31% | 15% | 31% | 0% | 25% |
|--|-----------------------------------|-----|-----|-----|-----|-----|-----|----|-----|

For peer review only

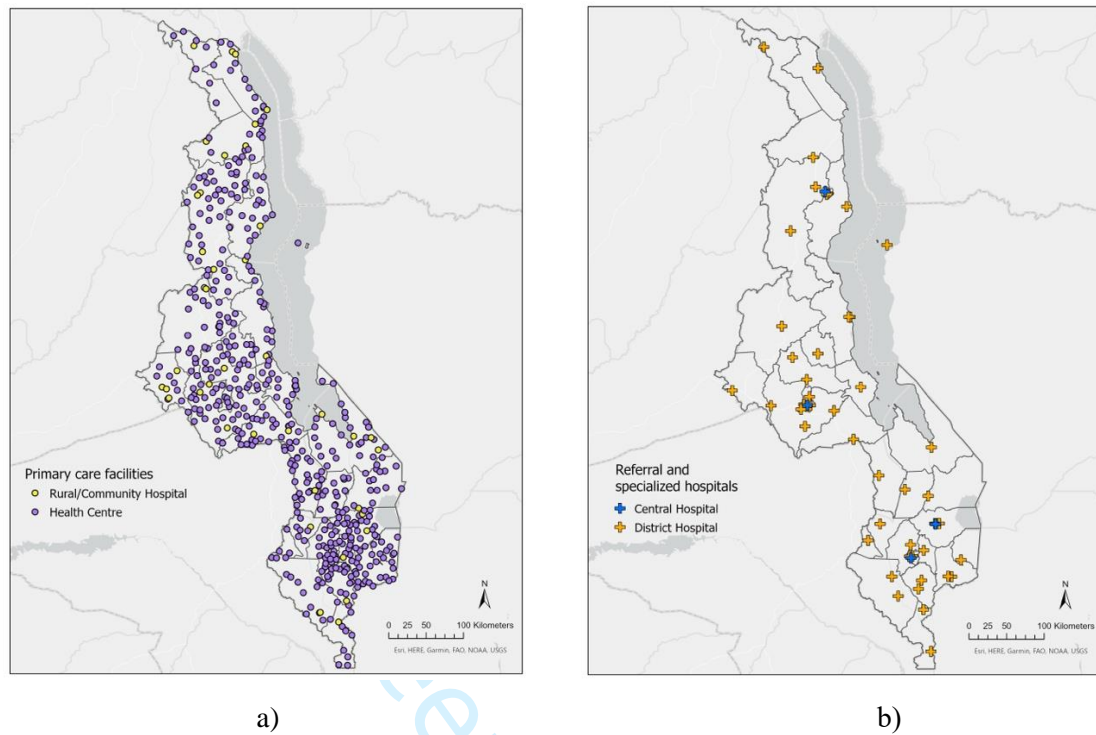

Appendix Figure 1. Spatial distribution of facilities in Malawi for a) PHCs and b) RSHs

Appendix Table 5: Service availability and service functionality for each essential medical component at PHCs and Secondary and Tertiary facilities

|                           |                                  | PHC (n = 512) |              | Secondary and Tertiary Facilities (n=52) |              |
|---------------------------|----------------------------------|---------------|--------------|------------------------------------------|--------------|
| Condition                 | Essential Equipment & Medication | % Available   | % Functional | % Available                              | % Functional |
| <b>Chronic Conditions</b> |                                  |               |              |                                          |              |
| Chronic Asthma            | Service Readiness (SR)           | -             | 8%           | -                                        | 40%          |
|                           | Beclomethasone inhaler           | 9%            | 9%           | 42%                                      | 42%          |
|                           | Salbutamol inhaler***            | 71%           | 71%          | 88%                                      | 88%          |
|                           | Stethoscope                      | 93%           | 92%          | 100%                                     | 100%         |
|                           | SR                               |               | 34%          |                                          | 88%          |

|                                                               |                                                                               |       |       |      |      |
|---------------------------------------------------------------|-------------------------------------------------------------------------------|-------|-------|------|------|
| Hypertension (stage 1 or 2)                                   | At least two of: calcium channel blocker, ACE inhibitor, thiazide, atenolol   | 37%   | 37%   | 88%  | 88%  |
|                                                               | Blood pressure apparatus                                                      | 93%   | 90%   | 100% | 98%  |
|                                                               | Stethoscope                                                                   | 93%   | 92%   | 100% | 100% |
| Type 1 diabetes                                               | SR                                                                            |       | 5%    |      | 88%  |
|                                                               | Blood glucose test equipment                                                  | 44%   | NA    | 98%  | NA   |
|                                                               | Insulin                                                                       | 7%    | 6%    | 90%  | 90%  |
| Type 2 diabetes                                               | SR                                                                            |       | 21%   |      | 94%  |
|                                                               | Blood glucose test equipment                                                  | 44%   | NA    | 98%  | NA   |
|                                                               | Metformin or glibenclamide                                                    | 30%   | 30%   | 96%  | 96%  |
| Pain care                                                     | SR                                                                            |       | 22%   |      | 29%  |
|                                                               | Oral pain medication                                                          | 100%  | 100%  | 100% | 100% |
|                                                               | Injectable morphine or pethidine                                              | 21%   | 21%   | 31%  | 29%  |
| Hypertension requiring three or more antihypertensive classes | SR                                                                            |       | 15%   |      | 75%  |
|                                                               | At least three of: calcium channel blocker, ACE inhibitor, thiazide, atenolol | 17.5% | 17.5% | 75%  | 75%  |
|                                                               | Blood pressure apparatus                                                      | 93%   | 90%   | 100% | 98%  |
|                                                               | Stethoscope                                                                   | 93%   | 92%   | 100% | 100% |
| Heart failure (RCH* only)                                     | SR                                                                            |       | 22%   |      | 38%  |
|                                                               | Adult scale                                                                   | 98%   | 95%   | 98%  | 98%  |
|                                                               | Atenolol or other beta-blocker                                                | 71%   | 71%   | 81%  | 79%  |
|                                                               | Blood pressure apparatus                                                      | 95%   | 93%   | 100% | 98%  |

|                                         |                                                     |     |     |      |      |
|-----------------------------------------|-----------------------------------------------------|-----|-----|------|------|
|                                         | Captopril, enalapril or other ACE inhibitor         | 67% | 67% | 75%  | 75%  |
|                                         | Furosemide                                          | 71% | 71% | 85%  | 85%  |
|                                         | Stethoscope                                         | 95% | 93% | 100% | 100% |
|                                         | Ultrasound equipment                                | 33% | 33% | 83%  | 77%  |
| Chronic RHD (RCH only)                  | SR                                                  |     | 7%  |      | 42%  |
|                                         | Benzathine penicillin                               | 78% | 78% | 83%  | 83%  |
|                                         | Injectable epinephrine                              | 31% | 31% | 58%  | 56%  |
| <b>Acute Conditions</b>                 |                                                     |     |     |      |      |
| Mild/moderate acute Asthma (RCH only)   | SR                                                  |     | 17% |      | 50%  |
|                                         | Functional X-ray machine                            | 34% | 29% | 83%  | 73%  |
|                                         | Oxygen availability (cylinder or concentrator)      | 85% | 8%  | 88%  | 88%  |
|                                         | Peak flow meter in NCD or general outpatient area** | NA  | NA  | NA   | NA   |
|                                         | Prednisolone                                        | 73% | 73% | 88%  | 88%  |
|                                         | Pulse oximeter                                      | 61% | 59% | 92%  | 88%  |
|                                         | Salbutamol inhaler***                               | 93% | 93% | 88%  | 88%  |
| Moderate/severe acute Asthma (RCH only) | SR                                                  |     | 15% |      | 44%  |
|                                         | Functional X-ray machine                            | 33% | 29% | 83%  | 73%  |
|                                         | Oxygen availability (cylinder or concentrator)      | 86% | 86% | 88%  | 88%  |
|                                         | Peak flow meter in NCD or general                   | NA  | NA  | NA   | NA   |

|                                       |                                                                              |     |     |      |     |
|---------------------------------------|------------------------------------------------------------------------------|-----|-----|------|-----|
|                                       | outpatient area<br>**                                                        |     |     |      |     |
|                                       | Prednisolone                                                                 | 73% | 73% | 88%  | 88% |
|                                       | Pulse oximeter                                                               | 62% | 60% | 92%  | 88% |
|                                       | Salbutamol<br>inhaler***                                                     | 93% | 93% | 88%  | 88% |
|                                       | Micronebuliser<br>in NCD or<br>general<br>outpatient area<br>**              | NA  | NA  | NA   | NA  |
|                                       | Hydrocortisone<br>injection                                                  | 62% | 62% | 85%  | 85% |
| Acute diabetic<br>event (RCH<br>only) | SR                                                                           |     | 22% |      | 65% |
|                                       | Blood glucose<br>test equipment                                              | 95% | NA  | 98%  | NA  |
|                                       | Blood pressure<br>apparatus in<br>NCD or general<br>outpatient area          | 95% | 93% | 100% | 98% |
|                                       | Infusion kit for<br>intravenous<br>fluids                                    | 88% | NA  | 92%  | NA  |
|                                       | Injectable<br>glucose                                                        | 81% | 81% | 92%  | 92% |
|                                       | Insulin                                                                      | 48% | 48% | 90%  | 90% |
|                                       | Liver and kidney<br>function<br>diagnostics<br>(creatinine,<br>electrolytes) | 45% | 17% | 85%  | 31% |
| Acute epilepsy<br>(RCH only)          | SR                                                                           |     | 36% |      | 85% |
|                                       | Diazepam<br>injection                                                        | 36% | 36% | 85%  | 85% |
| injuries/ acute<br>minor surgical     | SR                                                                           |     | 24% |      | 46% |



|                           |                                                         |     |     |     |     |
|---------------------------|---------------------------------------------------------|-----|-----|-----|-----|
| conditions+<br>(RCH only) | Lidocaine in<br>minor surgical<br>area                  | 95% | 95% | 98% | 98% |
|                           | Nasogastric tubes<br>in minor surgical<br>area          | 67% | 64% | 77% | 77% |
|                           | Needle holder in<br>minor surgical<br>area              | 90% | 88% | 85% | 85% |
|                           | Oxygen<br>availability<br>(cylinder or<br>concentrator) | 86% | 86% | 88% | 88% |
|                           | Retractor in<br>minor surgical<br>area                  | 50% | 50% | 85% | 85% |
|                           | Scalpel in minor<br>surgical area                       | 86% | 83% | 85% | 85% |
|                           | Skin disinfectant<br>in minor surgical<br>area          | 86% | 86% | 87% | 87% |
|                           | Surgical scissors<br>in minor surgical<br>area          | 89% | 76% | 85% | 85% |
|                           | Sutures in minor<br>surgical area                       | 93% | 90% | 98% | 98% |
|                           | Tourniquet in<br>minor surgical<br>area                 | 57% | 57% | 69% | 69% |

\*RCH : Rural Community Hospital which is considered a higher level PHC facility

\*\*Data not available in 2019 HHFA.

\*\*\*Expected to be provided at primary level.

Appendix: Figure 2: Service readiness and service functionality for each essential medical component at PHCs and Secondary and Tertiary facilities- Chronic Conditions

1  
2  
3  
4  
5  
6  
7  
8  
9  
10  
11  
12  
13  
14  
15  
16  
17  
18  
19  
20  
21  
22  
23  
24  
25  
26  
27  
28  
29  
30  
31  
32  
33  
34  
35  
36  
37  
38  
39  
40  
41  
42  
43  
44  
45  
46  
47  
48  
49  
50  
51  
52  
53  
54  
55  
56  
57  
58  
59  
60

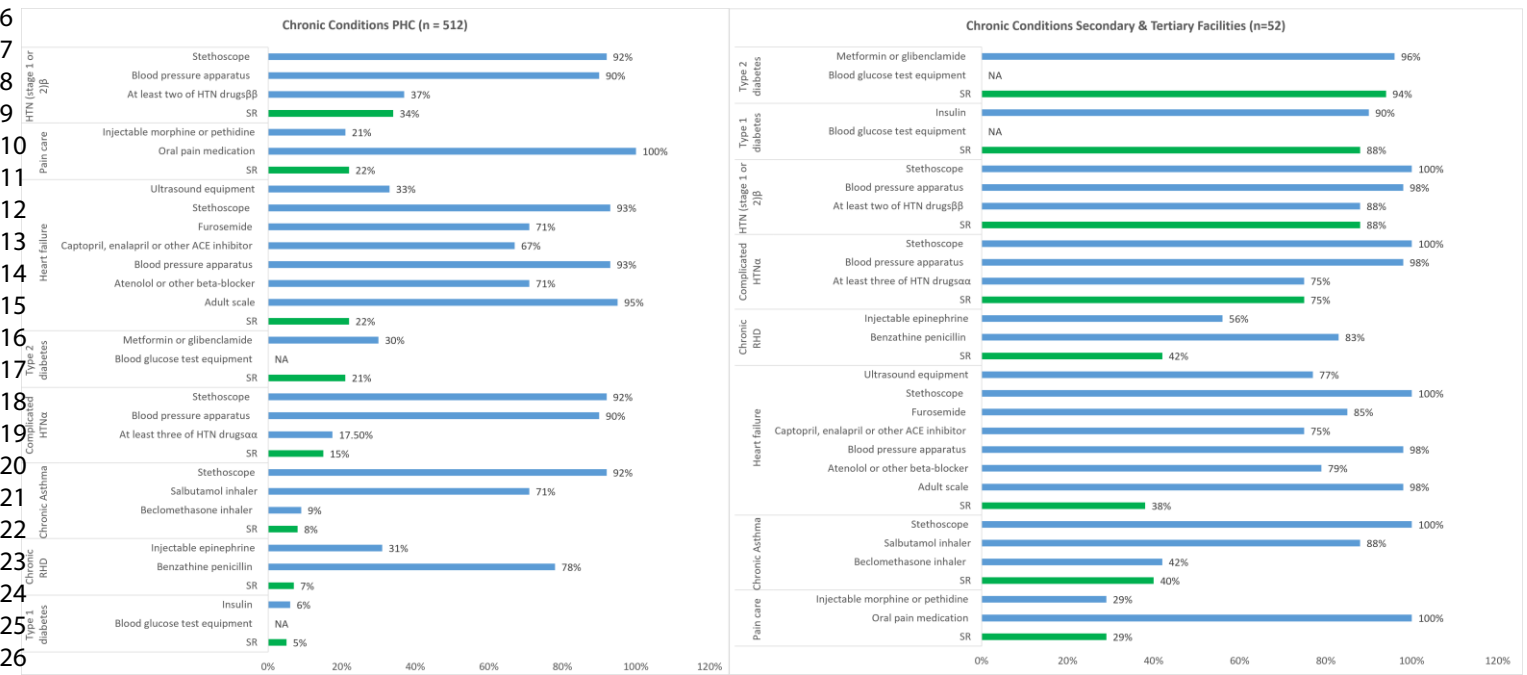

Appendix: Figure 3: Service readiness and service functionality for each essential medical component at PHCs and Secondary and Tertiary facilities- Acute Conditions

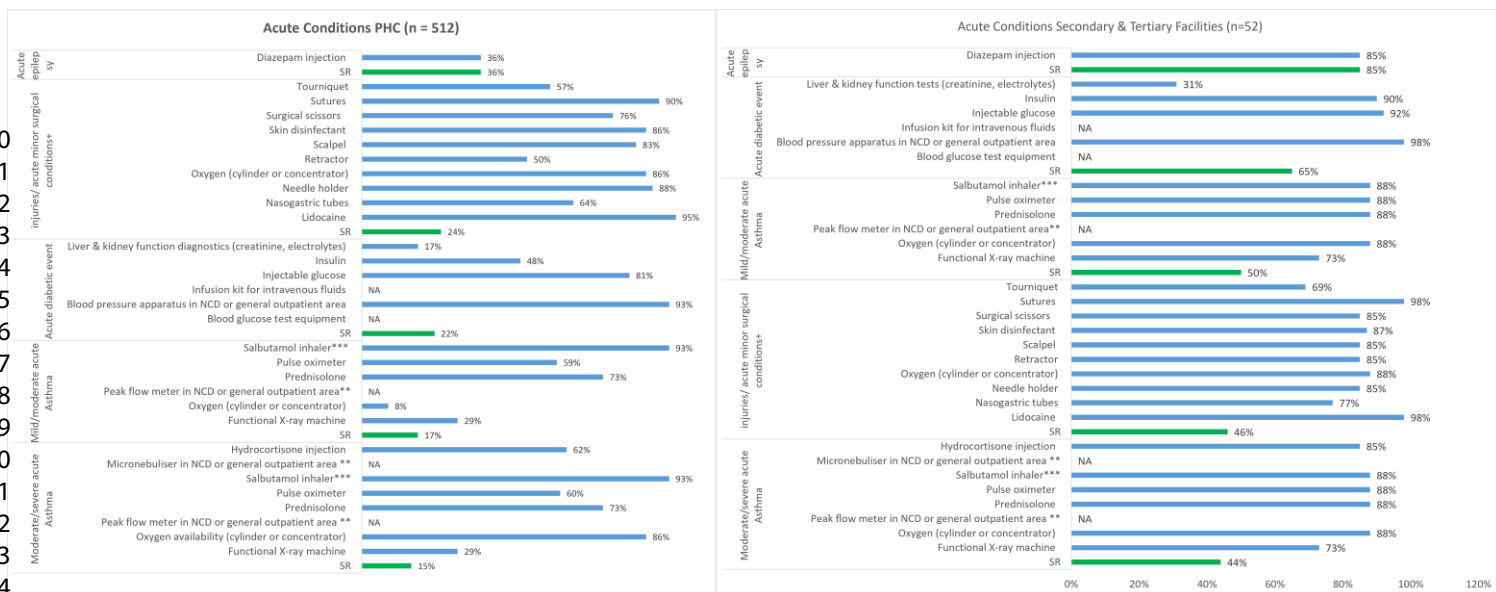

# BMJ Open

## Service readiness for the management of non-communicable diseases in publicly financed facilities in Malawi: findings from the 2019 Harmonized Health Facility Assessment census survey

|                                 |                                                                                                                                                                                                                                                                                                                                                                                                                                                                                                                                                                                                                                                                                                                                                                                                                                                                                                                                                                                                                                                                                                              |
|---------------------------------|--------------------------------------------------------------------------------------------------------------------------------------------------------------------------------------------------------------------------------------------------------------------------------------------------------------------------------------------------------------------------------------------------------------------------------------------------------------------------------------------------------------------------------------------------------------------------------------------------------------------------------------------------------------------------------------------------------------------------------------------------------------------------------------------------------------------------------------------------------------------------------------------------------------------------------------------------------------------------------------------------------------------------------------------------------------------------------------------------------------|
| Journal:                        | <i>BMJ Open</i>                                                                                                                                                                                                                                                                                                                                                                                                                                                                                                                                                                                                                                                                                                                                                                                                                                                                                                                                                                                                                                                                                              |
| Manuscript ID                   | bmjopen-2023-072511.R1                                                                                                                                                                                                                                                                                                                                                                                                                                                                                                                                                                                                                                                                                                                                                                                                                                                                                                                                                                                                                                                                                       |
| Article Type:                   | Original research                                                                                                                                                                                                                                                                                                                                                                                                                                                                                                                                                                                                                                                                                                                                                                                                                                                                                                                                                                                                                                                                                            |
| Date Submitted by the Author:   | 05-Oct-2023                                                                                                                                                                                                                                                                                                                                                                                                                                                                                                                                                                                                                                                                                                                                                                                                                                                                                                                                                                                                                                                                                                  |
| Complete List of Authors:       | Ahmed, Sali; University of Washington, Department of Global Health<br>Cao, Yanjia ; The University of Hong Kong, Department of Geography<br>Wang, Zicheng ; Harvard University, T.H. Chan School of Public Health<br>Coates, Matthew M.; Brigham and Women's Hospital, Department of Medicine<br>Twea, Pakwanja ; University of Bergen, Department of Global Health and Primary Care (IGS); Ministry of Health, Department of Planning and Policy Development<br>Ma, Mingyang; Harvard University, Department of Biostatistics<br>Chiwanda Banda, Jonathan; Ministry of Health, Curative and Medical Rehabilitation Services ; Kamuzu University of Health Sciences, Department of Community and Environmental Health<br>Wroe, Emily; Brigham and Women's Hospital, Department of Medicine<br>Bai, Lan; Nanjing University of Traditional Chinese Medicine, Department of Public Administration<br>Watkins, DA; University of Washington, Seattle, Department of Medicine; University of Washington Seattle Campus, Department of Global Health<br>Su, Yanfang; University of Washington, School of Medicine |
| <b>Primary Subject Heading</b>: | Health policy                                                                                                                                                                                                                                                                                                                                                                                                                                                                                                                                                                                                                                                                                                                                                                                                                                                                                                                                                                                                                                                                                                |
| Secondary Subject Heading:      | Health services research                                                                                                                                                                                                                                                                                                                                                                                                                                                                                                                                                                                                                                                                                                                                                                                                                                                                                                                                                                                                                                                                                     |
| Keywords:                       | Health Services Accessibility, Health Equity, Primary Health Care, Chronic Disease                                                                                                                                                                                                                                                                                                                                                                                                                                                                                                                                                                                                                                                                                                                                                                                                                                                                                                                                                                                                                           |
|                                 |                                                                                                                                                                                                                                                                                                                                                                                                                                                                                                                                                                                                                                                                                                                                                                                                                                                                                                                                                                                                                                                                                                              |

SCHOLARONE™  
Manuscripts



I, the Submitting Author has the right to grant and does grant on behalf of all authors of the Work (as defined in the below author licence), an exclusive licence and/or a non-exclusive licence for contributions from authors who are: i) UK Crown employees; ii) where BMJ has agreed a CC-BY licence shall apply, and/or iii) in accordance with the terms applicable for US Federal Government officers or employees acting as part of their official duties; on a worldwide, perpetual, irrevocable, royalty-free basis to BMJ Publishing Group Ltd ("BMJ") its licensees and where the relevant Journal is co-owned by BMJ to the co-owners of the Journal, to publish the Work in this journal and any other BMJ products and to exploit all rights, as set out in our [licence](#).

The Submitting Author accepts and understands that any supply made under these terms is made by BMJ to the Submitting Author unless you are acting as an employee on behalf of your employer or a postgraduate student of an affiliated institution which is paying any applicable article publishing charge ("APC") for Open Access articles. Where the Submitting Author wishes to make the Work available on an Open Access basis (and intends to pay the relevant APC), the terms of reuse of such Open Access shall be governed by a Creative Commons licence – details of these licences and which [Creative Commons](#) licence will apply to this Work are set out in our licence referred to above.

Other than as permitted in any relevant BMJ Author's Self Archiving Policies, I confirm this Work has not been accepted for publication elsewhere, is not being considered for publication elsewhere and does not duplicate material already published. I confirm all authors consent to publication of this Work and authorise the granting of this licence.

1  
2  
3 **Service readiness for the management of non-communicable diseases in publicly financed**  
4 **facilities in Malawi: findings from the 2019 Harmonized Health Facility Assessment**  
5 **census survey**  
6  
7

8 Sali Ahmed<sup>1^</sup>, Yanjia Cao<sup>2^</sup>, Zicheng Wang<sup>3^</sup>, Matthew M. Coates<sup>4</sup>, Pakwanja Twea<sup>5,6</sup>,  
9 Mingyang Ma<sup>7</sup>, Jonathan Chiwanda<sup>8</sup>, Emily B. Wroe<sup>4</sup>, Lan Bai<sup>9</sup>, David A. Watkins<sup>1,10</sup>,  
10 Yanfang Su<sup>1\*</sup>  
11

12 [1] Department of Global Health, School of Public Health, University of Washington, Seattle,  
13 WA, USA 98195  
14

15 [2] Department of Geography, The University of Hong Kong, Hong Kong SAR  
16

17 [3] Department of Epidemiology, Harvard T.H. Chan School of Public Health, Boston, MA  
18 02115  
19

20 [4] Center for Integration Science in Global Health Equity, Division of Global Health Equity,  
21 Department of Medicine, Brigham and Women's Hospital, Boston, MA, USA, 02115  
22

23 [5] Bergen Centre for Ethics and Priority Setting, University of Bergen, Bergen, Norway  
24

25 [6] Department of Planning and Policy Development, Ministry of Health, Lilongwe, Malawi  
26

27 [7] Department of Biostatistics, Harvard University, Boston, Massachusetts, USA, 02115  
28

29 [8] Department of Clinical Services, Ministry of Health, Lilongwe, Malawi  
30

31 [9] Department of Public Administration, School of Health Economics and Management,  
32 Nanjing University of Traditional Chinese Medicine, Nanjing, China  
33

34 [10] Division of General Internal Medicine, Department of Medicine, University of  
35 Washington, Seattle, WA, USA 98195  
36

37 ^Co-first authors

38 \*Corresponding author  
39  
40

41 Sali Ahmed

42 [salia@uw.edu](mailto:salia@uw.edu)  
43  
44

45  
46 Zicheng Wang

47 [zicheng\\_wang@hsph.harvard.edu](mailto:zicheng_wang@hsph.harvard.edu)  
48  
49

50  
51 Yanjia Cao

52 [yanjiac@hku.hk](mailto:yanjiac@hku.hk)  
53  
54

55  
56 Matthew M. Coates

57 [mmcoates@bwh.harvard.edu](mailto:mmcoates@bwh.harvard.edu)  
58  
59  
60

1  
2  
3 Pakwanja Twea

4 [pakwanja.twea@health.gov.mw](mailto:pakwanja.twea@health.gov.mw)  
5  
6  
7

8 Mingyang Ma

9 [mma@hsph.harvard.edu](mailto:mma@hsph.harvard.edu)  
10  
11  
12

13 Jonathan Chiwanda

14 [jonchiwanda@gmail.com](mailto:jonchiwanda@gmail.com)  
15  
16  
17

18 Emily Wroe

19 [ewroe@pih.org](mailto:ewroe@pih.org)  
20  
21  
22

23 Lan Bai

24 [dreamhour@163.com](mailto:dreamhour@163.com)  
25  
26  
27

28 David A. Watkins

29 [davidaw@uw.edu](mailto:davidaw@uw.edu)  
30  
31  
32

33 Yanfang Su

34 [yfsu@uw.edu](mailto:yfsu@uw.edu)  
35  
36  
37  
38  
39  
40  
41  
42  
43  
44  
45  
46  
47  
48  
49  
50  
51  
52  
53  
54  
55  
56  
57  
58  
59  
60

For peer review only

## ABSTRACT

**Introduction:** Non-communicable diseases (NCDs) are rising in low-and middle-income countries (LMICs), including Malawi. To inform policymakers and planners on the preparedness of the Malawian healthcare system to respond to NCDs, we estimated NCD service readiness in publicly financed healthcare facilities in Malawi.

**Methods:** We analyzed data from 564 facilities surveyed in the 2019 Harmonized Health Facility Assessment (HHFA), including 512 primary health care (PHC) and 52 secondary and tertiary care (STC) facilities. To characterize service readiness, applying the law of minimum, we estimated the percentage of facilities where the equipment and medicines required to provide NCD services were functional. Further, we estimated permanently unavailable items to identify service readiness bottlenecks.

**Results:** Fewer than 40% of PHC facilities were ready to deliver services for any of the 13 NCDs analyzed. Insulin and beclomethasone inhalers had the lowest stock levels at PHC facilities (6% and 8%, respectively). Almost half of rural and community hospitals (RCHs) have never had insulin and benzathine penicillin (49% and 44%, respectively). STC facilities had varying service readiness, ranging from 27% for managing acute diabetes complications to 94% for chronic type 2 diabetes management. Only 38% of STC facilities were ready to manage heart failure. Oral pain medicines were widely available at all levels of health facilities; however, only 22% of RCH and 29% of STCs had injectable morphine or pethidine.

**Conclusion:** Publicly financed facilities in Malawi are generally unprepared to provide NCD services, especially at the PHC level. Targeted investments in PHC can substantially improve service readiness for chronic NCD conditions in local communities and enable STC to respond to acute NCD complications and more complex NCD cases.

### Strengths and limitations of this study

- This study quantified non-communicable disease (NCD) service readiness critical to achieving universal health coverage (UHC) with a census sample of publicly financed facilities.
- Our approach provides generalizable results for all health facilities in Malawi.
- Our analyses by facility and service type can help planners better target investments to lagging areas.
- The analysis is limited to service-specific readiness and does not assess broader dimensions of health facility readiness, like human resources and basic infrastructure.
- The HHFA survey collects data on a subset of equipment and medicines required to manage NCDs and minor surgical conditions, constraining how service readiness is defined.



## INTRODUCTION

Non-communicable diseases (NCDs) are responsible for 60% of early death and disability globally, and their growing burden in low- and middle-income countries (LMICs) is particularly concerning. According to the World Health Organization (WHO), 77% of the annual global NCD deaths occur in LMICs.(1) In 2021, NCDs caused 41 million deaths worldwide, among which 29 million died of the four major conditions, including cardiovascular disease (CVD), cancer, chronic respiratory disease, and diabetes. Several studies have reported low levels of NCD service readiness in LMICs.(2,3)

Located in Sub-Saharan Africa (SSA) with an 18.6 million population, Malawi remains one of the world's poorest countries, with a national Gross Domestic Product (GDP) of only \$645 per capita in 2022.(4) Malawi suffers from a high burden of NCDs and their economic consequences that affect the country's overall economic development and lead to catastrophic health expenditures (CHE) for many Malawians seeking care.(5–7) As of 2019, NCDs accounted for 40% of mortality in Malawi, an increase from 30% in 2010.(8)

Characterizing service readiness to manage NCDs in Malawi can help identify areas for investment to better respond to NCDs. Several prior studies provisionally assessed the preparedness of the Malawian healthcare system. A 2018 study analyzed data from the 2013-2015 Malawi Service Provision Assessment (SPA).(3) Another SPA-based study assessed the preparedness of first-referral level hospitals in eight low-income countries, including Malawi, and estimated the percentages of facilities with complete minimal sets of equipment and medicines needed for thirteen NCD conditions.(9) The results from these studies only presented assessments around 2015, when the SPA dataset was published.(3,9) A recent study estimated screening, diagnosis, management, and rehabilitation services readiness for NCDs based on a survey of 22 health facilities between 2019 and 2020.(10) The study employed a limited sample, which warrants caution in extrapolating the findings to all health facilities in Malawi. Having up-to-date and comprehensive information regarding health facilities' NCD service readiness in Malawi is essential for formulating evidence-informed health policies and judicious resource allocation. This study aims to fill a knowledge gap about service readiness for major NCD conditions using the most recent 2019 Harmonized Health Facility Assessment (HHFA) survey. This study has two main objectives. First, we estimate NCD service readiness by analyzing the availability and functionality of essential equipment and medicines to diagnose and treat common NCD conditions. Second, we identify potential bottlenecks that limit NCD service readiness.

## METHODS

### Study setting

Healthcare in Malawi is delivered through public, private for-profit (PFP), and private not-for-profit (PNFP) facilities.(11) The publicly-financed sector is intended to be universally accessible without payment at the point of care, while PFP and PNFP facilities are not open to everyone and only represent 11% of the facilities in the Malawian health system.(12,13) We focused our analysis on publicly financed facilities owned by the government and the Christian Health Association of Malawi (CHAM). The government is the leading healthcare provider in Malawi, while CHAM offers approximately 75% of healthcare services in remote and rural

1  
2  
3 areas.(14,15) Besides, in 2006, the government sought to enhance healthcare access for  
4 underserved rural populations by partnering with CHAM through a service legal agreement,  
5 wherein CHAM provides healthcare services at no cost to users and is later reimbursed by the  
6 government for the incurred service expenses.(15) The health system in Malawi is structured  
7 into primary, secondary, and tertiary levels. Primary care at health centers and rural community  
8 hospitals (RCH) offers ambulatory and maternity services. Secondary care includes first-  
9 referral (district) hospitals, while central hospitals constitute tertiary care.(11) Our analysis is  
10 disaggregated into PHC facilities (health centers and RCHs) and STC facilities (district and  
11 central hospitals) (Figure 1).  
12  
13  
14  
15

## 16 **Data source**

17 Our study analyzes the 2019 HHFA, funded by the WHO, the World Bank, and other  
18 collaborators. The HHFA is an update of the Service Availability and Readiness Assessment  
19 (SARA) survey, which was, in turn, built upon the SPA survey. The 2019 HHFA covered all  
20 publicly financed health facilities in the country. This survey adopted a census sample approach,  
21 covering all functional publicly financed facilities in Malawi (n=1098), of which 564 were  
22 owned by the Government and CHAM. The remaining facilities surveyed by the HHFA were  
23 owned by faith-based organizations other than CHAM and NGO-owned facilities falling under  
24 the private for-profit (PFP) and private not-for-profit (PNFP) categories. The HHFA assessed  
25 service readiness by asking whether the equipment and medicines required to provide different  
26 NCD services were available and functional.  
27  
28  
29

30 Our analysis included all facilities that were supposed to provide NCD services and  
31 functioning during the survey. We removed one hospital, Zomba Mental Hospital, from our  
32 sample because it did not offer NCD services included in our analysis. According to the  
33 Administration of Health records, there were 485 registered health centers. However, only  
34 471 of these were assessed by the HHFA. As a result, the 14 centers that were not surveyed  
35 were considered 'non-functional.'  
36

37 The final sample we included in our analysis (n=564) consisted of 512 PHC facilities (471  
38 health centers and 41 rural/community hospitals) and 52 STC facilities (48 district hospitals  
39 and 4 central hospitals (Appendix Table 1). The 48 district hospitals included actual district  
40 hospitals, large health centers functioning as quasi-district hospitals and first-referral-level  
41 CHAM hospitals. The spatial distribution of sampled facilities is displayed in Figure 1.  
42  
43  
44

## 45 **Data analysis**

46 This study focused on the readiness of basic equipment and medicines to diagnose and treat  
47 five acute and seven chronic NCD conditions. The conditions included in the analysis are acute  
48 and chronic asthma, hypertension, heart failure, rheumatic heart disease (RHD), diabetes,  
49 epilepsy, injuries, and minor surgical conditions, and chronic pain (Appendix Table 2).  
50 Assessing the service availability for these conditions aligns with recommendations from the  
51 Disease Control Priorities Project and related publications on priority interventions for NCDs  
52 (16–19). The conditions included in our study are also prioritized in the Malawi Ministry of  
53 Health National Action Plan for NCD Prevention and Management 2017-2022.(20) We defined  
54 service readiness as having functional equipment and medicines stock to provide the NCD  
55 service in question. We considered equipment functional if it was operational and present in  
56 general outpatient or minor surgical areas. Medicines were considered “functional” if they were  
57 in stock, not expired, and appropriately stored in a manner that preserves the medicine's  
58  
59  
60

potency.

### Operational definitions and measures

Partners in the Ministry of Health advised us on the expected availability of NCD services at different levels of health facilities based on national guidelines and policies (Appendix Table 2). We extracted the corresponding indicators from the HHFA survey for analysis and examined data missingness to refine our indicator for each service. We detail the conditions, items, indicators, and related facility types in Appendix Table 3 and the missingness analysis in Appendix Table 4. When certain services were not expected to be offered at health centers, we only included rural/community hospital data in the denominator for those services' indicators.

Regarding missingness, the HHFA survey did not include questions on peak flow meters and micro-nebulizers required for asthma management in the outpatient setting. Therefore, we examined SPA data to understand how these missing variables might have affected the asthma readiness measure (Appendix Table 5). For the variables with close to 100% missing data, we assumed that the item was not expected to be available at the facility level.

The HHFA survey classifies medicines or equipment as "available and functional," "available but not functional," "not available (at this time)," or "never available" at the facility. Accordingly, we calculated three indicators: 1) functionality, 2) permanent unavailability, and 3) service readiness.

**Functionality:** Functionality refers to the presence of the functioning items (equipment and stock of medicines, not expired and properly stored) involved in providing a given NCD service.

$$\text{Functionality} = \frac{\text{number of facilities with available and functioning item}}{\text{Total number of facilities}}$$

**Service readiness:** For each facility, we estimated service readiness based on the functionality of the set of basic items required to provide a given NCD service.

**Permanent unavailability:** Permanent unavailability is when the item (medicine or equipment) is never present at the health facility, i.e., not temporarily unavailable due to supply issues.

$$\text{Permanent unavailability} = \frac{\text{number of facilities with items that were never present}}{\text{Total number of facilities}}$$

When a facility had all essential components available and functioning, it was labeled "ready" to provide that service. Otherwise, the facility was labeled as "Not ready."

Applying Carl Sprengel's Law of the Minimum, this study likens service readiness to an organism's growth.<sup>(21)</sup> We pinpoint the limiting factor impeding readiness, analogous to the lowest point in a barrel regulating water level (Figure 2). This method guarantees a robust service readiness assessment, as absent data on non-limiting factors does not bias the results. However, if data on the limiting factor is missing, service readiness may be overestimated, as seen in the difference between the complete and incomplete barrels in Figure 2.

### Patient and public involvement

None.

## RESULTS

We included 564 facilities (i.e., 512 PHC facilities and 52 STC facilities) in our analysis.

1  
2  
3 There were 14 non-functioning health centers and one specialized tertiary hospital excluded  
4 from our analysis. Based on the Ministry of Health guidelines and missing data, we assumed  
5 that the following services were not expected to be delivered at health centers: chronic heart  
6 failure care, chronic rheumatic heart disease care, treatment of acute asthma exacerbations,  
7 acute complications of diabetes, acute epilepsy (seizures), and injuries (Appendix Table 2).  
8 Except for the missing data on conditions at health centers, all other variables had less than  
9 25% missing data (Appendix Table 4).  
10

11 NCD service readiness Figure 3 compares the service readiness of PHC and STC facilities for  
12 chronic and acute NCD services. Overall, the readiness of STC facilities was higher than  
13 PHCs. We found that the service readiness was lower than 40% for NCD services at PHC  
14 facilities. Among the chronic NCD services, PHC facilities were least ready to provide  
15 services for type 1 diabetes and chronic asthma (5% and 8%, respectively). Among the acute  
16 services included in the analysis, RCHs were least ready to manage acute complications of  
17 diabetes (12%), acute asthma exacerbations (less than 20%), and injuries/acute minor surgical  
18 conditions (24%). PHCs had higher readiness scores for managing acute epilepsy (among  
19 RCH in PHC estimation) and stage 1 and 2 hypertension. STC facilities were near full  
20 readiness for type 2 diabetes (94%), type 1 diabetes (88%), stage 1 and 2 hypertension (88%),  
21 and acute epilepsy treatment (85%). However, STC facilities were least ready to provide care  
22 for acute complications of diabetes (27%) and had relatively lower readiness for managing  
23 chronic asthma, pain, heart failure, rheumatic heart disease, moderate/severe acute asthma,  
24 and injuries/ acute minor surgical conditions.  
25  
26  
27  
28  
29  
30

### 31 **Equipment functionality and Medicine stock**

32 Figure 4 shows the functionality of equipment and medicines stock required to provide the 13  
33 services we included in the analysis. Insulin for type 1 diabetes and beclomethasone inhalers  
34 for managing chronic asthma had the lowest stock at the PHC level (6% and 8%, respectively).  
35 Around 90% of STCs had insulin, but beclomethasone inhalers show low stock (42%) at STC  
36 health facilities. Availability of antihypertensives is low in PHC facilities, with only 16%  
37 having “at least three or more antihypertensive classes” of medication and only 37% having at  
38 least two, compared to 75% and 88% in STC facilities. The availability of functional diagnostic  
39 equipment was limited, even in RCHs. For example, functional X-ray machines were found in  
40 only 29% of the RCHs, and ultrasound was functional in 34%.  
41  
42

43 Additionally, only 46% of RCH stock insulin for managing acute complications of diabetes,  
44 compared to 90% of STC facilities. However, RCH and STC facilities had low availability of  
45 functioning diagnostic tests required to manage acute complications of diabetes. Liver and  
46 kidney function tests were functional in only 17% of the RCH and 31% of STC facilities.  
47  
48

### 49 **Permanently unavailable items**

50 As shown in Figure 5, beclomethasone was a "bottleneck item" for chronic asthma service  
51 readiness at all levels since it was never available at 74% of PHC and 29% of STC facilities.  
52 Basic medicines for managing type 1 and 2 diabetes and acute complications of diabetes were  
53 bottleneck items for diabetes care readiness at PHC facilities. For chronic rheumatic heart  
54 disease management, 44% of RCH did not have benzathine penicillin. However, Figure 5 also  
55 shows that there were items consistently in stock. These include oral pain medicines,  
56 salbutamol inhalers, and diazepam injections, among others.  
57  
58  
59  
60

## DISCUSSION

Our analysis reveals significant gaps and disparities in the readiness of health facilities to respond to the growing burden of NCDs in Malawi. Fewer than 40% of PHCs are ready to diagnose and manage any of the 13 NCD services included in the analysis. Although STC facilities had higher readiness scores, 50% or fewer were not ready to diagnose and treat conditions like acute diabetes events, asthma, injuries/minor surgeries, chronic heart failure, chronic rheumatic heart disease, and pain. PHCs were least ready with basic equipment and medicines to manage type 1 diabetes and chronic asthma (less than 10%) and were most ready to treat acute epilepsy (37%). PHCs had higher readiness to manage Stage 1 and 2 hypertension (34%) but were less ready to treat complicated hypertension requiring three or more antihypertensive classes.

Our findings are consistent with prior studies that illustrate an urgent need to invest more in health systems across sub-Saharan Africa, including Malawi, to respond to NCDs.(3,9,10) In line with previous analyses, we found notable gaps and limited readiness to manage NCDs, particularly in PHC facilities.(3,10,22) Analysis of 2013-2015 SPA data for primary, secondary, and tertiary level facilities in Malawi showed that only 37.7% of PHC facilities were ready to provide services for diabetes, Chronic Respiratory Disease, and CVD compared to 96% of STC facilities.(3) Compared to the 2013-2015 SPA analysis of 43 first-referral level facilities, chronic asthma service readiness had increased to 40% in STC facilities compared to 5% in 2015.(9) STC facility readiness to manage type 1 and 2 diabetes increased from around 40% to 90%. Readiness for managing hypertension stages 1 and 2 increased from 44% to 88%, while services for hypertension requiring three or more antihypertensive classes increased from 26% to 75%. Readiness of STC facilities increased from 12% to 38% for chronic heart failure and from 9% to 42% for chronic rheumatic heart disease, but there was no increase in readiness for managing acute complications of diabetes. Service readiness for acute epilepsy and pain care decreased from 95% to 85% and 58% to 29%, respectively.

The deficiencies in NCD services are not unique to Malawi. Studies analyzing SPA data revealed low readiness of NCD services in countries like Tanzania, Singal, and Ethiopia.(3,9) Additional cross-sectional surveys to assess NCD services readiness revealed a similar pattern in Zambia but slightly higher readiness scores in Kenya, but the difference might stem from the dissimilarity in the service readiness calculation method.(22,23) Also, a systematic analysis of survey data focused on diabetes in sub-Saharan Africa reported low diagnostic capacity and supply of diabetes medicines in 14 African countries.(24)

Our analysis revealed a number of bottleneck items for NCD care in Malawi, including beclomethasone inhalers. Asthma management is not part of the NCD intervention package included in the essential health package of Malawi, and the Standard Treatment Guidelines for Malawi state that beclomethasone is only expected to be provided at the tertiary level.(25,26) However, the WHO considers beclomethasone as an essential and cost-effective intervention for chronic asthma care that can be provided at PHC facilities.(27,28) Our study suggests that the 2015 Standard Treatment Guidelines for Malawi could be revised to align with WHO recommendations, ensuring better access to asthma care in the community.

Addressing NCDs is a critical component of the health-related SDGs.(19)The essential health package developed by the Ministry of Health specified that management of diabetes, hypertension, and injuries be provided at primary and secondary facilities.(26) Unfortunately, our study shows that most PHC facilities had low service readiness for these services and others. The Ministry of Health has acknowledged concerns about the suboptimal implementation of the Essential Health Package due to inadequate resources, low awareness among stakeholders,

1  
2  
3 and the lack of clear financial mechanisms to ensure the provision of free-of-charge services at  
4 the point of care. To make progress on NCDs, the Ministry will need to explore options for  
5 increasing healthcare financing in a manner that will benefit the entire range of healthcare needs,  
6 including NCDs.  
7

8  
9 This study has several limitations. Notably, our definition of service readiness is constrained  
10 by the methodology used in the HHFA survey, which focuses on a specific subset of equipment  
11 and medicines. This can introduce bias depending on the criteria and items used to define  
12 service readiness. For example, as the HHFA survey does not assess the availability of the  
13 nebulizers and peak flow meter in the outpatient departments, we did not include them as part  
14 of the essential equipment required for treating acute asthma. To address this, we analyzed  
15 2013-2015 SPA data to understand potential bias in our estimates. Data from the 2013-2015  
16 SPA survey about the peak flow meter suggests that we may have overestimated the service  
17 readiness for acute asthma (Appendix Table 5). While availability may have grown since 2015,  
18 if availability remains unchanged, it may be an alarming limiting factor for the overall readiness  
19 for acute asthma care. Second, the HHFA covers a limited range of health conditions and  
20 potential services for NCDs. We recommend that the WHO continue refining the HHFA survey  
21 to enhance the scope and precision of indicators for essential healthcare.  
22  
23

24 Additionally, the scope of our analysis is limited to service-specific readiness for a few NCDs  
25 and does not assess broader dimensions of health facility readiness, like human resources and  
26 basic infrastructure. A study by Banda et al.(10) of a smaller number of health facilities  
27 assessed other dimensions not included in the HHFA survey, such as whether facilities kept  
28 reliable records for NCD patients, supplemented with qualitative interviews to characterize the  
29 constraints.  
30

## 31 **CONCLUSION**

32  
33 Our analysis reveals that, despite progress since 2015, health facilities in Malawi have a long  
34 way to go to ensure universal access to NCD services. Despite being the first point of care and  
35 the ideal platform for early detection and long-term management of most NCDs, PHC facilities  
36 in Malawi have low NCD service readiness. While health centers and rural/community  
37 hospitals may not be expected to perform complete diagnostics or treatment for complicated  
38 conditions, these primary care facilities are well-positioned to provide basic services for  
39 common NCDs. PHC facilities urgently need additional investment to improve NCD service  
40 availability. For other NCDs, a progressive approach to decentralizing NCD care would start  
41 by building the capacity of RCH that, over time, could allow for extending a broader range of  
42 services to PHC facilities. Our list of bottlenecks and permanently unavailable items provides  
43 a starting point to enhance the supply of medicines and equipment. The list can also inform the  
44 updating of guidelines to achieve better service readiness for particular conditions sensitive to  
45 these identified bottlenecks.  
46  
47  
48  
49

## 50 **Contributors**

51  
52  
53 ZW, YC, and SA led the literature review and wrote the first draft of the manuscript. PT and  
54 JC provided data and supporting documents. ZW and LB analyzed the data, and MM replicated  
55 the estimates. ZW and MM produced the tables. YS, YC, and SA created the figures. MC, PT,  
56 EW, and DW contributed to conceiving the study, refining the methods, and interpreting the  
57 results. DW acquired funding for the research. YS led the study design, method development,  
58 and result interpretation. All the authors have made significant intellectual or practical  
59 contributions, critically revised the manuscript, and approved the final version of this paper.  
60

### Competing interests

We declare that none of the authors nor coauthors have any financial or non-financial competing interests that may influence the analysis or the interpretation of this paper.

### Funding

This work was supported by the Bergen Centre for Ethics and Priority Setting (BCEPS) with support from the Trond Mohn Foundation and the Norwegian Agency for Development Cooperation (NORAD), project number 874 789 542.

### Data availability statement

The data supporting this study's findings were obtained through the MoH Malawi and are not available in a public repository.

### Ethics approval

As this study was an analysis of an existing dataset, review and approval by an IRB was not required.

### Acknowledgments

The authors thank the Ministry of Health in Malawi. We are thankful for the replication of results by Jiashuo Sun and graphic design by Lisa Fox, Meranda Wang, Jingning Wang, and Ella Shi. We are also grateful for all the valuable comments from Simon Ding, editors and reviewers.

### References

1. World Health Organization. Noncommunicable disease [Internet]. Available from: <https://www.who.int/news-room/fact-sheets/detail/noncommunicable-diseases>
2. Leslie HH, Spiegelman D, Zhou X, Kruk ME. Service readiness of health facilities in Bangladesh, Haiti, Kenya, Malawi, Namibia, Nepal, Rwanda, Senegal, Uganda and the United Republic of Tanzania. *Bull World Health Organ*. 2017 Nov 1;95(11):738–48.
3. Moucheraud C. Service Readiness For Noncommunicable Diseases Was Low In Five Countries In 2013–15. *Health Aff (Millwood)*. 2018;37(8).
4. The World Bank. The World Bank Data - Malawi [Internet]. 2022. Available from: <https://data.worldbank.org/country/MW>
5. Kim ET, Singh K, Speizer IS, Angeles G, Weiss W. Availability of health facilities and utilization of maternal and newborn postnatal care in rural Malawi. *BMC Pregnancy Childbirth*. 2019 Dec 17;19(1):503.
6. Macarayan EK, Gage AD, Doubova SV, Guanais F, Lemango ET, Ndiaye Y, et al. Assessment of quality of primary care with facility surveys: a descriptive analysis in ten low-income and middle-income countries. *Lancet Glob Health*. 2018 Nov 1;6(11):e1176–85.
7. Wang Q, Brenner S, Kalmus O, Banda HT, De Allegri M. The economic burden of chronic non-communicable diseases in rural Malawi: an observational study. *BMC Health Serv Res*. 2016 Sep 1;16(1):457.
8. Wroe EB, Kalanga N, Dunbar EL, Nazimera L, Price NF, Shah A, et al. Expanding access to non-communicable disease care in rural Malawi: outcomes from a retrospective cohort in an integrated

- 1  
2  
3 NCD–HIV model. *BMJ Open*. 2020 Oct;10(10):e036836.  
4  
5  
6 9. Gupta N, Coates MM, Bekele A, Dupuy R, Fénelon DL, Gage AD, et al. Availability of equipment and  
7 medications for non-communicable diseases and injuries at public first-referral level hospitals: a cross-  
8 sectional analysis of service provision assessments in eight low-income countries. *BMJ Open*. 2020  
9 Oct;10(10):e038842.
- 10  
11 10. Banda CK, Hosseinipour MC, Kumwenda J, Banda NPK, Lutala P, Makwero M, et al. Systems Capacity  
12 To Conduct Non-Communicable Disease Focused Implementation Research In The Malawian Health  
13 Sector: A National Needs Assessment [Internet]. In Review; 2021 May [cited 2021 Nov 23]. Available  
14 from: <https://www.researchsquare.com/article/rs-496152/v1>
- 15  
16 11. MOH, Malawi. Health Care System [Internet]. 2016 [cited 2022 Dec 12]. Available from:  
17 <https://www.health.gov.mw/index.php/2016-01-06-19-58-23/national-aids>
- 18  
19 12. Makwero MT. Delivery of primary health care in Malawi. *Afr J Prim Health Care Fam Med*.  
20 2018;10(1):e1–3.
- 21  
22 13. World Health Organization. Malawi: Country Cooperation Strategy at a glance [Internet]. 2018.  
23 Available from:  
24 [http://apps.who.int/iris/bitstream/handle/10665/136935/ccsbrief\\_mwi\\_en.pdf;jsessionid=6622A9B](http://apps.who.int/iris/bitstream/handle/10665/136935/ccsbrief_mwi_en.pdf;jsessionid=6622A9B77AC48437784A63B1C127472E?sequence=1)  
25 [77AC48437784A63B1C127472E?sequence=1](http://apps.who.int/iris/bitstream/handle/10665/136935/ccsbrief_mwi_en.pdf;jsessionid=6622A9B77AC48437784A63B1C127472E?sequence=1)
- 26  
27 14. Zeng W, Sun D, Mphwanthe H, Huan T, Nam JE, Saint-Firmin P, et al. The impact and cost-effectiveness  
28 of user fee exemption by contracting out essential health package services in Malawi. *BMJ Glob Health*.  
29 2019 Apr;4(2):e001286.
- 30  
31 15. Mchenga M, Manthalu G, Chingwanda A, Chirwa E. Developing Malawi’s Universal Health Coverage  
32 Index. *Front Health Serv* [Internet]. 2022 [cited 2023 Sep 30];1. Available from:  
33 <https://www.frontiersin.org/articles/10.3389/frhs.2021.786186>
- 34  
35 16. Watkins D, Jamison D, Mills A, Atun R, Danforth K, Glassman A, et al. “Universal Health Coverage and  
36 Essential Packages of Care”. In: *Disease Control Priorities (third edition): Volume 9, Disease Control*  
37 *Priorities*, edited by D. T. Jamison, H. Gelband, S. Horton, P. Jha, R. Laxminarayan, C. N. Mock, R. Nugent.  
38 Washington, DC: World Bank. [Internet]. [cited 2023 Jul 14]. Available from: [https://dcp-](https://dcp-3.org/chapter/2551/essential-universal-health-coverage)  
39 [3.org/chapter/2551/essential-universal-health-coverage](https://dcp-3.org/chapter/2551/essential-universal-health-coverage)
- 40  
41 17. Prabhakaran D, Anand S, Watkins D, Gaziano T, Wu Y, Mbanja JC, et al. Cardiovascular, respiratory,  
42 and related disorders: key messages from *Disease Control Priorities*, 3rd edition. *The Lancet*. 2018 Mar  
43 24;391(10126):1224–36.
- 44  
45 18. Annex 3C. Essential Universal Health Coverage: Interventions and Platforms. Supplementary material  
46 for: Watkins, DA, DT Jamison, A Mills, R Atun, K Danforth, and others. 2018. “Universal Health Coverage  
47 and Essential Packages of Care.” In *Disease Control Priorities: Improving Health and Reducing Poverty*  
48 edited by DT Jamison, H Gelband, S Horton, P Jha, R Laxminarayan, CN Mock, and R Nugent. Volume 9  
49 of *Disease Control Priorities*, third edition. Washington, DC: World Bank. Available from: [http://dcp-](http://dcp-3.org/sites/default/files/chapters/Annex%203C_Interventions%20in%20EUHC.pdf)  
50 [3.org/sites/default/files/chapters/Annex%203C\\_Interventions%20in%20EUHC.pdf](http://dcp-3.org/sites/default/files/chapters/Annex%203C_Interventions%20in%20EUHC.pdf)
- 51  
52 19. Cardiovascular, Respiratory, and Related Disorders | DCP3 [Internet]. [cited 2023 Jul 14]. Available  
53 from: <https://dcp-3.org/cvd>
- 54  
55 20. MOH Republic of Malawi. National Action Plan for the Prevention and Management of Non-  
56 Communicable Diseases in Malawi. 2017; Available from: [https://www.iccp-](https://www.iccp-portal.org/system/files/plans/MWI_B3_s21_Malawi%20NCD%20Strategy_2018.pdf)  
57 [portal.org/system/files/plans/MWI\\_B3\\_s21\\_Malawi%20NCD%20Strategy\\_2018.pdf](https://www.iccp-portal.org/system/files/plans/MWI_B3_s21_Malawi%20NCD%20Strategy_2018.pdf)
- 58  
59  
60



- 1
  - 2
  - 3
  - 4
  - 5
  - 6
  - 7
  - 8
  - 9
  - 10
  - 11
  - 12
  - 13
  - 14
  - 15
  - 16
  - 17
  - 18
  - 19
  - 20
  - 21
  - 22
  - 23
  - 24
  - 25
  - 26
  - 27
  - 28
  - 29
  - 30
  - 31
  - 32
  - 33
  - 34
  - 35
  - 36
  - 37
  - 38
  - 39
  - 40
  - 41
  - 42
  - 43
  - 44
  - 45
  - 46
  - 47
  - 48
  - 49
  - 50
  - 51
  - 52
  - 53
  - 54
  - 55
  - 56
  - 57
  - 58
  - 59
  - 60
21. Tang J, Riley WJ. Finding Liebig's law of the minimum. *Ecol Appl.* 2021;31(8):e02458.
22. Shiroya V, Shawa N, Matanje B, Haloka J, Safary E, Nkhweliwa C, et al. Reorienting Primary Health Care Services for Non-Communicable Diseases: A Comparative Preparedness Assessment of Two Healthcare Networks in Malawi and Zambia. *Int J Environ Res Public Health.* 2021 May 10;18(9):5044.
23. Ammoun R, Wami WM, Otieno P, Schultsz C, Kyobutungi C, Asiki G. Readiness of health facilities to deliver non-communicable diseases services in Kenya: a national cross-sectional survey. *BMC Health Serv Res.* 2022 Aug 2;22:985.
24. Nuche-Berenguer B, Kupfer LE. Readiness of Sub-Saharan Africa Healthcare Systems for the New Pandemic, Diabetes: A Systematic Review. *J Diabetes Res.* 2018 Feb 18;2018:e9262395.
25. Ministry of Health, Malawi. Malawi Standard Treatment Guidelines Essential Medicines List 2015.pdf [Internet]. 2015 [cited 2022 Dec 12]. Available from: [https://extranet.who.int/ncdccs/Data/MWI\\_D1\\_Malawi-Standard-Treatment-Guidelines-Essential-Medicines-List-2015.pdf](https://extranet.who.int/ncdccs/Data/MWI_D1_Malawi-Standard-Treatment-Guidelines-Essential-Medicines-List-2015.pdf)
26. MOH Republic of Malawi. Health Sector Strategic Plan II, Towards Universal Health Coverage. 2017; Available from: <https://www.health.gov.mw/downloads/>
27. World Health Organization. 2008-2013 action plan for the global strategy for the prevention and control of noncommunicable diseases : prevent and control cardiovascular diseases, cancers, chronic respiratory diseases and diabetes. Plan Action 2008-2013 Pour Strat Mond Lutte Contre Mal Non Transm. 2009;42.
28. World Health Organization. Prevention and control of noncommunicable diseases: guidelines for primary health care in low resource settings [Internet]. Geneva: World Health Organization; 2012 [cited 2022 Dec 12]. 68 p. Available from: <https://apps.who.int/iris/handle/10665/76173>

## FIGURE LEGENDS

### Figure 1. Healthcare systems in Malawi

The figure presents the structure of the health system in Malawi and maps the health facilities in the country.

### Figure 2. Required items and service readiness relation

The figure presents the relationship between service readiness (water level) and complementary items (bars).

### Figure 3. NCD service readiness of the Malawi health system by level

The figure presents the service readiness of chronic and acute NCD conditions, comparing PHC Level to STC Level.

### Figure 4. Service functionality for each essential medical component at PHCs and STC

1  
2  
3 facilities

4  
5 The figure illustrates the availability of essential equipment and medicines considered in the  
6 analysis, categorizing them into equipment and medicine.  
7

8  
9 **Figure 5.** Permanent unavailability by facility level

10  
11 The figure presents the items that were never available, comparing the PHC and STC levels.  
12  
13  
14  
15  
16  
17  
18  
19  
20  
21  
22  
23  
24  
25  
26  
27  
28  
29  
30  
31  
32  
33  
34  
35  
36  
37  
38  
39  
40  
41  
42  
43  
44  
45  
46  
47  
48  
49  
50  
51  
52  
53  
54  
55  
56  
57  
58  
59  
60

For peer review only

1  
2  
3  
4  
5  
6  
7  
8  
9  
10  
11  
12  
13  
14  
15  
16  
17  
18  
19  
20  
21  
22  
23  
24  
25  
26  
27  
28  
29  
30  
31  
32  
33  
34  
35  
36  
37  
38  
39  
40  
41  
42  
43  
44  
45  
46  
47  
48  
49  
50  
51  
52  
53  
54  
55  
56  
57  
58  
59  
60

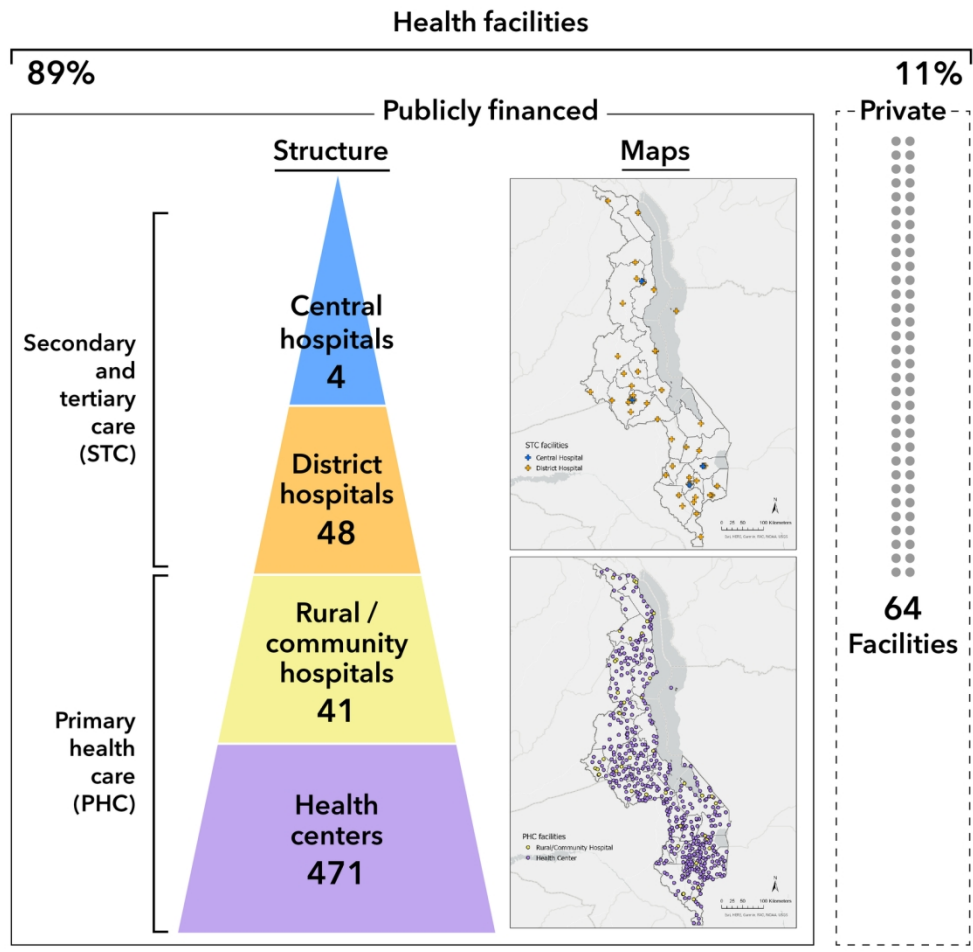

Figure 1. Healthcare system and facilities in Malawi

152x148mm (300 x 300 DPI)

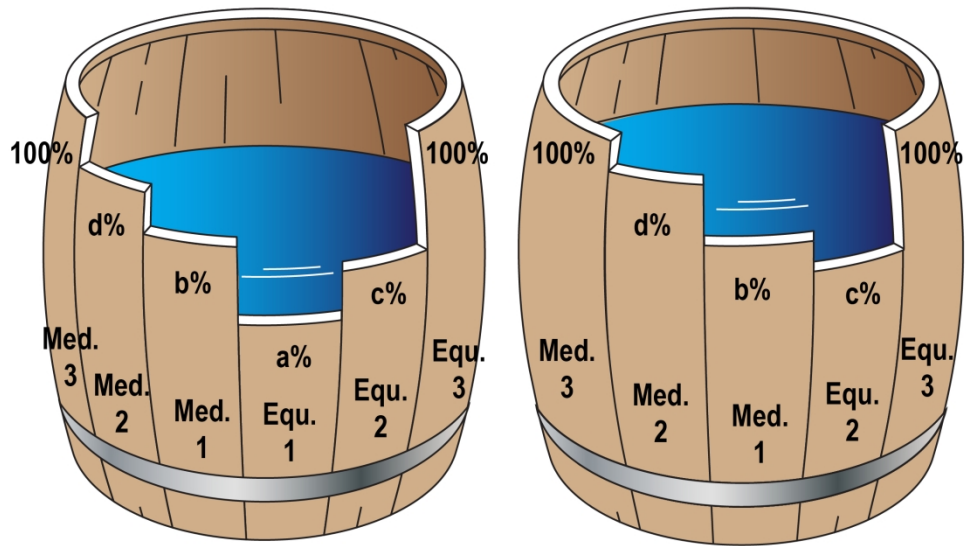

Figure 2: Required items and service readiness relation

207x121mm (300 x 300 DPI)

1  
2  
3  
4  
5  
6  
7  
8  
9  
10  
11  
12  
13  
14  
15  
16  
17  
18  
19  
20  
21  
22  
23  
24  
25  
26  
27  
28  
29  
30  
31  
32  
33  
34  
35  
36  
37  
38  
39  
40  
41  
42  
43  
44  
45  
46  
47  
48  
49  
50  
51  
52  
53  
54  
55  
56  
57  
58  
59  
60

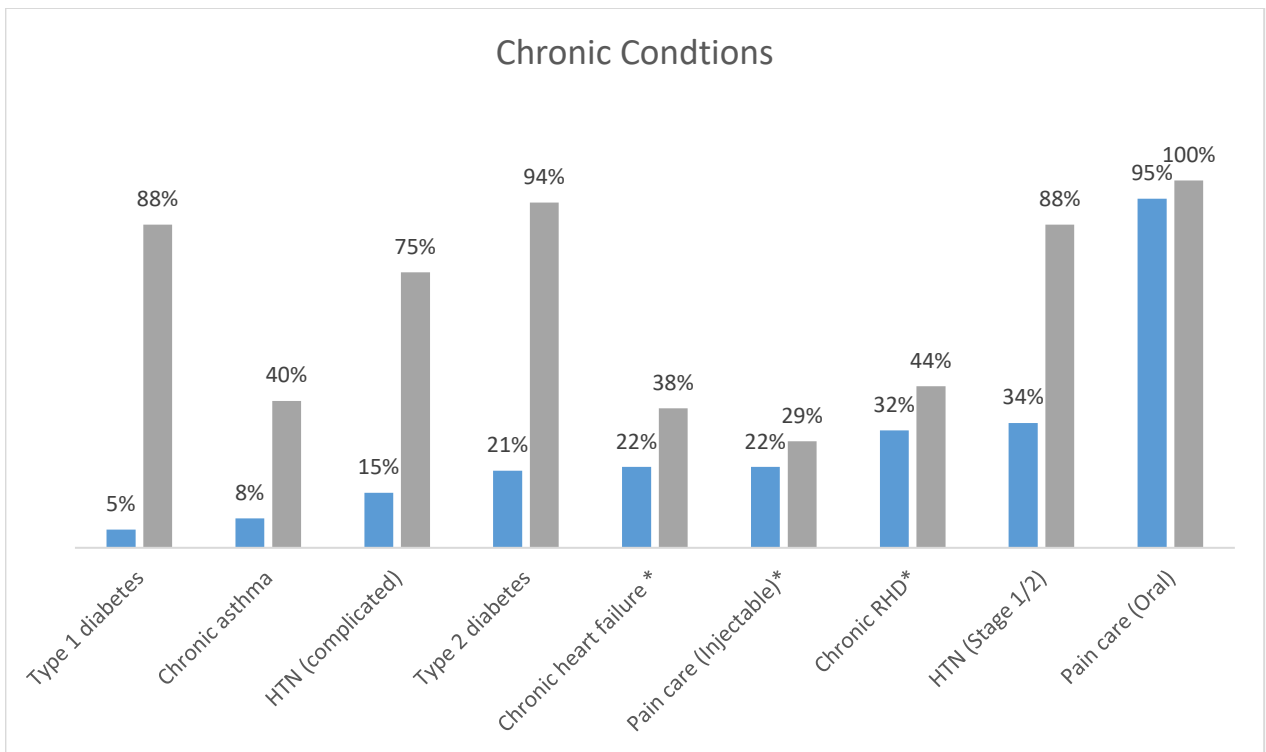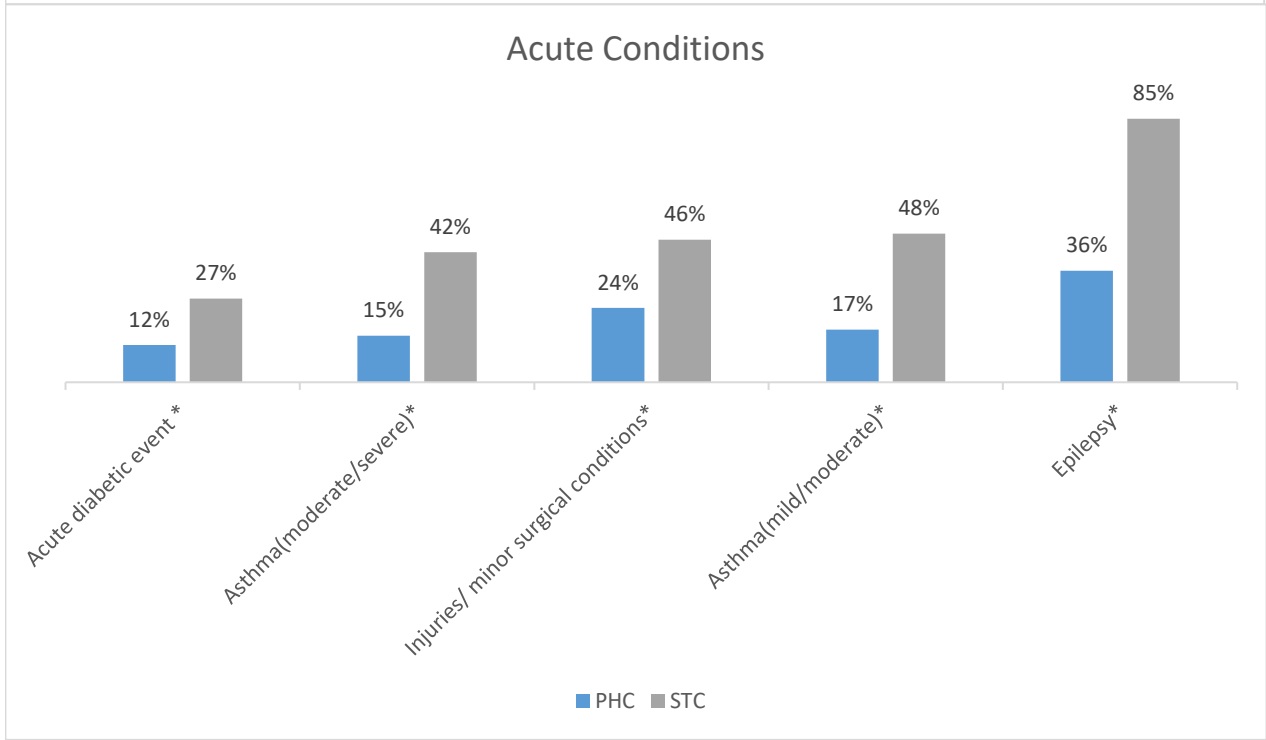

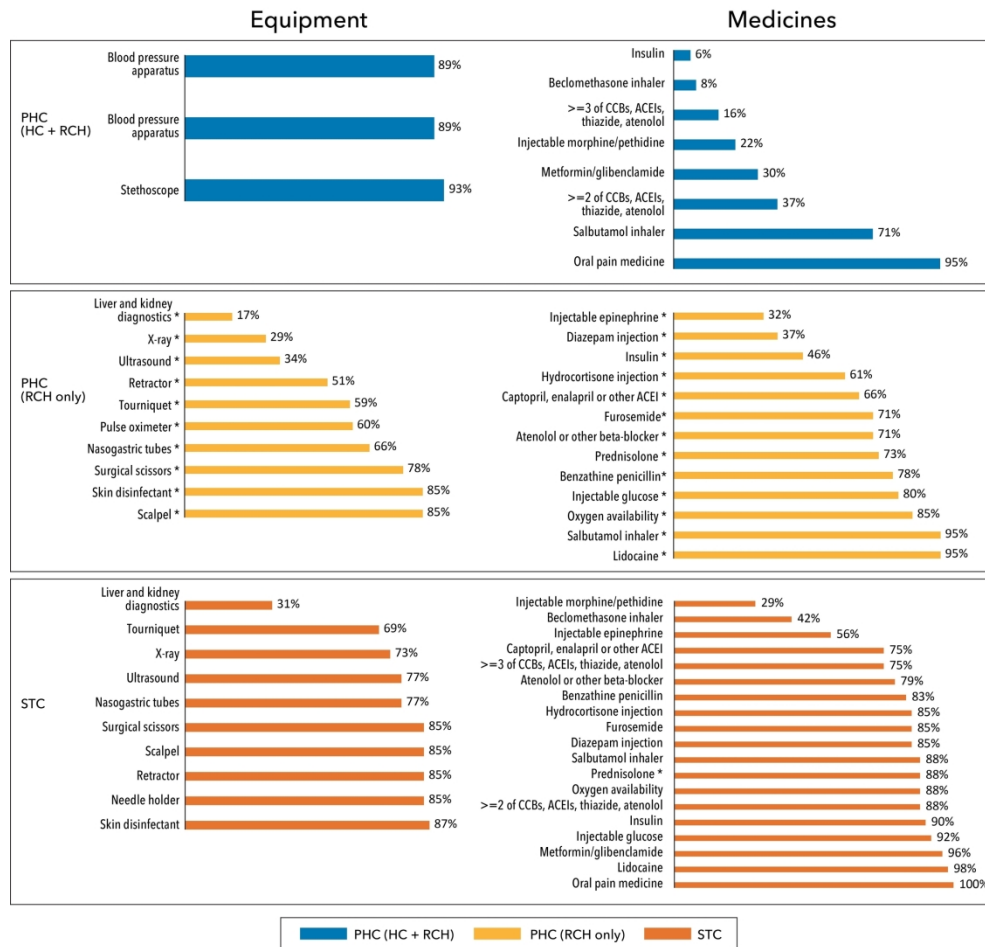

Figure 4: Functionality and stock of essential equipment and medicines at PHCs and STC facilities.

213x202mm (300 x 300 DPI)

| Condition                                 |                        | Equipment & Medicines                 | PHC          | STC |
|-------------------------------------------|------------------------|---------------------------------------|--------------|-----|
| Chronic Conditions                        | Chronic Asthma         | Beclomethasone inhaler                | 74%          | 29% |
|                                           |                        | Salbutamol inhaler                    | 8%           | 0%  |
|                                           | HTN (Stage 1 or 2)     | >=2 of: CCB, ACEI, thiazide, atenolol | 12%          | 0%  |
|                                           | Type 1 diabetes        | Insulin                               | 81%          | 2%  |
|                                           | Type 2 diabetes        | Metformin/glibenclamide               | 48%          | 0%  |
|                                           | Oral pain care         | Oral pain medication                  | 0%           | 0%  |
|                                           | Injectable pain care * | Injectable morphine/pethidine         | 7%           | 19% |
|                                           | Chronic heart failure* | Atenolol or other beta-blocker        | 24%          | 6%  |
|                                           |                        | Captopril, enalapril or other ACEI    | 20%          | 6%  |
|                                           |                        | Furosemide                            | 12%          | 2%  |
|                                           | Chronic RHD*           | Benzathine penicillin                 | 44%          | 8%  |
|                                           |                        | Injectable epinephrine                | 5%           | 10% |
|                                           | Acute Conditions       | Mild/moderate acute asthma*           | Prednisolone | 10% |
| Salbutamol inhaler                        |                        |                                       | 0%           | 0%  |
| Moderate/severe acute asthma*             |                        | Prednisolone                          | 10%          | 0%  |
|                                           |                        | Salbutamol inhaler                    | 0%           | 0%  |
|                                           |                        | Hydrocortisone injection              | 32%          | 8%  |
| Acute diabetic events*                    |                        | Injectable glucose                    | 0%           | 2%  |
|                                           |                        | Insulin                               | 49%          | 2%  |
| Acute epilepsy*                           |                        | Diazepam injection                    | 0%           | 0%  |
| Injuries/acute minor surgical conditions* |                        | Lidocaine                             | 2%           | 0%  |
|                                           |                        | Skin disinfectant                     | 5%           | 2%  |
|                                           | Sutures                | 5%                                    | 0%           |     |

Appendix Table 1. Summary of publicly financed facility representation in each category

| Facility type                     | Primary health care (PHC) facilities |                                 |       | Secondary and tertiary care (STC) facilities |                   |       |
|-----------------------------------|--------------------------------------|---------------------------------|-------|----------------------------------------------|-------------------|-------|
|                                   | Health centers                       | Rural/Community hospitals (RCH) | Total | District hospitals                           | Central hospitals | Total |
| <b>Total facilities</b>           | 485                                  | 41                              | 526   | 48                                           | 5                 | 53    |
| <b>Non-functional facilities*</b> | 14                                   | 0                               | 14    | 0                                            | 0                 | 0     |
| <b>HHFA samples</b>               | 471**                                | 41                              | 512   | 48                                           | 4                 | 52    |

\*We consider the facilities not surveyed by the HHFA as "non-functional" because HHFA is a census survey.

\*\*Three quasi-district hospitals were categorized as "District Hospitals": Ndirande Health Centre, Matawale Health Centre, and Mzuzu Health Centre.



Appendix Table 2: NCD services analyzed by expected level of service

| Condition                                                     | Primary health care facilities |                           | Secondary and tertiary facilities |                   |
|---------------------------------------------------------------|--------------------------------|---------------------------|-----------------------------------|-------------------|
|                                                               | Health Centers                 | Rural/Community Hospitals | District Hospitals                | Central Hospitals |
| <b>Controlled chronic conditions</b>                          |                                |                           |                                   |                   |
| Chronic asthma                                                | x                              | x                         | x                                 | x                 |
| Hypertension (stage 1 or 2)                                   | x                              | x                         | x                                 | x                 |
| Type 1 diabetes                                               | x                              | x                         | x                                 | x                 |
| Type 2 diabetes                                               | x                              | x                         | x                                 | x                 |
| Oral pain care                                                | x                              | x                         | x                                 | x                 |
| Injectable pain care                                          |                                | x                         | x                                 | x                 |
| Hypertension requiring three or more antihypertensive classes | x                              | x                         | x                                 | x                 |
| Heart failure                                                 |                                | x                         | x                                 | x                 |
| Chronic RHD                                                   |                                | x                         | x                                 | x                 |
| <b>Acute exacerbations and complications</b>                  |                                |                           |                                   |                   |
| Mild/moderate acute Asthma                                    |                                | x                         | x                                 | x                 |
| Moderate/severe acute Asthma                                  |                                | x                         | x                                 | x                 |
| Acute diabetic events                                         |                                | x                         | x                                 | x                 |
| Acute epilepsy                                                |                                | x                         | x                                 | x                 |
| injuries/ acute minor Surgical conditions+                    |                                | x                         | x                                 | x                 |

Appendix Table 3: Service Indicators

## Part 1: Acute conditions

| diseases                                       | Essential equipment and medications               | Availability Indicators                                                                      | Functionality Indicators                                                        | “Never Available” Data Availability | Facility Types Surveyed* |
|------------------------------------------------|---------------------------------------------------|----------------------------------------------------------------------------------------------|---------------------------------------------------------------------------------|-------------------------------------|--------------------------|
| Mild/moderate acute Asthma                     | Functional X-ray machine                          | T125_01 (Y = 1,2,3; N = 4,NA)                                                                | T125_01 (Y = 1; N = 2,4,NA)                                                     | No Data                             | 1,2,3                    |
|                                                | Oxygen availability (cylinder or concentrator)    | HH101__22 (Y = “Yes”, N = “No”, NA) <b>OR</b> HH101__23 (cylinder) (Y = “Yes”, N = “No”, NA) | HH101A22 (Y = “Yes”, N = “No”, NA) <b>OR</b> HH101A23 (Y = “Yes”, N = “No”, NA) | No Data                             | 1,2,3,4                  |
|                                                | Peak flow meter in NCD or general outpatient area | No Data (used SPA data for estimation)                                                       | No Data                                                                         | No Data                             | No Data                  |
|                                                | Prednisolone                                      | U103_10 (Y = 1,2; N = 3,4,5,NA)                                                              | U103_10 (Y = 1; N = 2,3,4,5,NA)                                                 | U103_10 = 5                         | 1,2,3,4                  |
|                                                | Pulse oximeter                                    | HH101__8 (Y = “Yes”, N = “No”, NA)                                                           | HH101A8 (Y = “Yes”, N = “No”, NA)                                               | No Data                             | 1,2,3,4                  |
|                                                | Salbutamol inhaler                                | U103_21 (Y = 1,2; N = 3,4,5,NA)                                                              | U103_21 (Y = 1; N = 2,3,4,5,NA)                                                 | U103_21 = 5                         | 1,2,3,4                  |
|                                                | Moderate/severe acute Asthma                      | Functional X-ray machine                                                                     | T125_01 (Y = 1,2,3; N = 4,NA)                                                   | T125_01 (Y = 1; N = 2,4,NA)         | No data                  |
| Oxygen availability (cylinder or concentrator) |                                                   | HH101__22 (Y = “Yes”, N = “No”, NA) <b>OR</b> HH101__23 (cylinder) (Y = “Yes”, N = “No”, NA) | HH101A22 (Y = “Yes”, N = “No”, NA) <b>OR</b> HH101A23 (Y = “Yes”, N = “No”, NA) | No data                             | 1,2,3,4                  |
| Peak flow meter in NCD or general              |                                                   | No Data (used SPA data for estimation)                                                       | No data                                                                         | No data                             | No data                  |

|                |                                                                  |                                                                                             |                                                                    |                             |                                             |
|----------------|------------------------------------------------------------------|---------------------------------------------------------------------------------------------|--------------------------------------------------------------------|-----------------------------|---------------------------------------------|
|                | outpatient area                                                  |                                                                                             |                                                                    |                             |                                             |
|                | Prednisolone                                                     | U103_10 (Y = 1, 2; N = 3,4,5,NA)                                                            | U103_10 (Y = 1; N = 2,3,4,5,NA)                                    | U103_10 = 5                 | 1,2,3,4                                     |
|                | Pulse oximeter                                                   | HH101_8 (Y = "Yes", N = "No", NA)                                                           | HH101A8 (Y = "Yes", N = "No", NA)                                  | No data                     | 1,2,3,4                                     |
|                | Salbutamol inhaler                                               | U103_21 (Y = 1,2; N = 3,4,5,NA)                                                             | U103_21 (Y = 1; N = 2,3,4,5,NA)                                    | U103_21 = 5                 | 1,2,3,4                                     |
|                | Micro nebuliser in NCD or general outpatient area                | No Data (used SPA data for estimation)                                                      | No Data                                                            | No Data                     | No Data                                     |
|                | Hydrocortisone injection                                         | U103_11 (Y = 1,2; N = 3,4,5,NA)                                                             | U103_11 (Y = 1; N = 2,3,4,5,NA)                                    | U103_11 = 5                 | 1,2,3,4                                     |
| Acute diabetes | Blood glucose test equipment                                     | T105_01 (Y = 1,2; N = 3,NA)                                                                 | No Data                                                            | No Data                     | 1,2,3,4                                     |
|                | Blood pressure apparatus in NCD or general outpatient area       | HH101_15 (Y = "Yes", N = "No", NA)                                                          | HH101A15 (Y = "Yes", N = "No", NA)                                 | No Data                     | 1,2,3,4                                     |
|                | Infusion kit for intravenous fluids                              | M116_161 (Y = "Yes", N = "No")                                                              | No Data                                                            | No Data                     | 1,2,3,4                                     |
|                | Injectable glucose                                               | U103_03 (Y = 1,2; N = 3,4,5,NA)                                                             | U103_03 (Y = 1; N = 2,3,4,5,NA)                                    | U103_03 = 5                 | 1,2,3,4                                     |
|                | Insulin                                                          | U103_02 (Y = 1,2; N = 3,4,5,NA)                                                             | U103_02 (Y = 1; N = 2,3,4,5,NA)                                    | U103_02 = 5                 | 1,2,3,4                                     |
|                | Liver and kidney function diagnostics (creatinine, electrolytes) | T113_03 (Y = 1,2; N = 3,NA) Or T122_01 (Y = 1,2; N = 3,NA) Or T123_01 (Y = 1,2,3; N = 4,NA) | T123_01 (Y = 1; N = 2,3,4,NA)                                      | T123_01 = 5                 | 1,2,3                                       |
| Acute epilepsy | Diazepam injection                                               | U125_16 (Y = 1,2; N = 3,4,5,NA) Or U126_05 (Y = 1,2; N = 3,4,5,NA)                          | U125_16 (Y = 1; N = 2,3,4,5,NA) Or U126_05 (Y = 1; N = 2,3,4,5,NA) | U125_16 = 5 And U126_05 = 5 | All facility types AND M103.Yes.Contains(8) |

|                                            |                                                |                                                                                     |                                                                          |                 |         |
|--------------------------------------------|------------------------------------------------|-------------------------------------------------------------------------------------|--------------------------------------------------------------------------|-----------------|---------|
|                                            |                                                | 1,2; N = 3,4,5,NA)                                                                  | 1; N = 2,3,4,5,NA)                                                       |                 |         |
| Injuries/ acute minor surgical conditions+ | Lidocaine in minor surgical area               | U125_12 (Y = 1,2; N = 3,4,5,NA)                                                     | U125_12 (Y = 1; N = 2,3,4,5,NA)                                          | U125_12 (Y = 5) | 1,2,3,4 |
|                                            | Nasogastric tubes in minor surgical area       | RR115_7 (Y = "Yes", N = "No", NA)                                                   | RR115A7 (Y = "Yes", N = "No", NA)                                        | No Data         | 1,2,3   |
|                                            | Needle holder in minor surgical area           | RR115_3 (Y = "Yes", N = "No", NA)                                                   | RR115A3 (Y = "Yes", N = "No", NA)                                        | No Data         | 1,2,3   |
|                                            | Oxygen availability (cylinder or concentrator) | HH101_22 (Y = "Yes", N = "No", NA) OR HH101_23 (cylinder) (Y = "Yes", N = "No", NA) | HH101A22 (Y = "Yes", N = "No", NA) OR HH101A23 (Y = "Yes", N = "No", NA) | No Data         | 1,2,3,4 |
|                                            | Retractor in minor surgical area               | RR115_5 (Y = "Yes", N = "No", NA))                                                  | RR115A5 (Y = "Yes", N = "No", NA))                                       | No Data         | 1,2,3   |
|                                            | Scalpel in minor surgical area                 | RR115_4 (Y = "Yes", N = "No", NA))                                                  | RR115A4 (Y = "Yes", N = "No", NA))                                       | No Data         | 1,2,3   |
|                                            | Skin disinfectant in minor surgical area       | U125_05 (Y = 1,2; N = 3,4,5,NA)                                                     | U125_05 (Y = 1, N = 2,3,4,5,NA)                                          | U125_05 (Y = 5) | 1,2,3,4 |
|                                            | Surgical scissors in minor surgical area       | RR115_6 (Y = "Yes", N = "No", NA)                                                   | RR115A6 (Y = "Yes", N = "No", NA)                                        | No Data         | 1,2,3   |
|                                            | Sutures in minor surgical area                 | U125_09 (Y = 1,2; N = 3,4,5)                                                        | U125_09 (Y = 1; N = 2,3,4,5)                                             | U125_09 (Y = 5) | 1,2,3,4 |
|                                            | Tourniquet in minor surgical area              | RR115_8 (Y = "Yes", N = "No", NA)                                                   | RR115A8 (Y = "Yes", N = "No", NA)                                        | No Data         | 1,2,3   |

Part 2: Chronic Conditions

| Conditions     | Availability of complete essential equipment and medications | Availability Indicators      | Functionality Indicators     | "Never Available" Data Availability | Facility Types Surveyed |
|----------------|--------------------------------------------------------------|------------------------------|------------------------------|-------------------------------------|-------------------------|
| Chronic asthma | Beclomethasone                                               | U103_09 (Y = 1,2; N = 3,4,5) | U103_09 (Y = 1; N = 2,3,4,5) | U103_09 (Y = 5)                     | 1,2,3,4                 |

|                                                               |                                                                               |                                                         |                                                         |                                                             |         |
|---------------------------------------------------------------|-------------------------------------------------------------------------------|---------------------------------------------------------|---------------------------------------------------------|-------------------------------------------------------------|---------|
|                                                               | inhaler                                                                       | 1,2; N = 1; N = 3,4,5,NA                                | =1; N = 2,3,4,5,NA)                                     | ==5                                                         |         |
|                                                               | Salbutamol inhaler                                                            | U103_21 (Y = 1,2; N = 3,4,5,NA)                         | =U103_21 (Y = 1; N = 2,3,4,5,NA)                        | =U103_21                                                    | 1,2,3,4 |
|                                                               | Stethoscope                                                                   | HH101_13 (Y = "Yes", N = "No", NA)                      | HH101A3 (Y = "Yes", N = "No", NA)                       | No Data                                                     | 1,2,3,4 |
| Hypertension (stage 1 or 2)                                   | At least two of: calcium channel blocker, ACE inhibitor, thiazide, atenolol   | U103_04, U103_05, U103_06, U103_07 (Y = 1,2; N = 3,4,5) | U103_04, U103_05, U103_06, U103_07 (Y = 1; N = 2,3,4,5) | U103_04 ==5 AND U103_05 ==5 AND U103_06 ==5 AND U103_07 ==5 | 1,2,3,4 |
|                                                               | Blood pressure apparatus                                                      | HH101_15 (Y = "Yes", N = "No", NA)                      | HH101A15 (Y = "Yes", N = "No", NA)                      | No data                                                     | 1,2,3,4 |
|                                                               | Stethoscope                                                                   | HH101_13 (Y = "Yes", N = "No", NA)                      | HH101A3 (Y = "Yes", N = "No", NA)                       | No data                                                     | 1,2,3,4 |
| Hypertension requiring three or more antihypertensive classes | At least three of: calcium channel blocker, ACE inhibitor, thiazide, atenolol | U103_04, U103_05, U103_06, U103_07 (Y = 1,2; N = 3,4,5) | U103_04, U103_05, U103_06, U103_07 (Y = 1; N = 2,3,4,5) | U103_04 ==5 AND U103_05 ==5 AND U103_06 ==5 AND U103_07 ==5 | 1,2,3,4 |
|                                                               | Blood pressure apparatus                                                      | HH101_15 (Y = "Yes", N = "No", NA)                      | HH101A15 (Y = "Yes", N = "No", NA)                      | No data                                                     | 1,2,3,4 |
|                                                               | Stethoscope                                                                   | HH101_13 (Y = "Yes", N = "No", NA)                      | HH101A3 (Y = "Yes", N = "No", NA)                       | No data                                                     | 1,2,3,4 |
| Heart failure                                                 | Adult scale                                                                   | HH101_1 (Y = "Yes", N = "No", NA)                       | HH101A1 (Y = "Yes", N = "No", NA)                       | No Data                                                     | 1,2,3,4 |
|                                                               | Atenolol or other beta-blocker                                                | U103_06 (Y = 1,2; N = 3,4,5,NA)                         | =U103_06 (Y = 1; N = 2,3,4,5,NA)                        | =U103_06                                                    | 1,2,3,4 |

|                 |                                             |                                    |                                    |                                        |         |
|-----------------|---------------------------------------------|------------------------------------|------------------------------------|----------------------------------------|---------|
|                 | Blood pressure apparatus                    | HH101_15 (Y = "Yes", N = "No", NA) | HH101A15 (Y = "Yes", N = "No", NA) | No data                                | 1,2,3,4 |
|                 | Captopril, enalapril or other ACE inhibitor | U103_04 (Y = 1,2; N = 3,4,5,NA)    | U103_04 (Y = 1; N = 2,3,4,5,NA)    | U103_04 = 5                            | 1,2,3,4 |
|                 | Furosemide                                  | U103_13 (Y = 1,2; N = 3,4,5,NA)    | U103_13 (Y = 1; N = 2,3,4,5,NA)    | U103_13 = 5                            | 1,2,3,4 |
|                 | Stethoscope                                 | HH101_13 (Y = "Yes", N = "No", NA) | HH101A3 (Y = "Yes", N = "No", NA)  | No data                                | 1,2,3,4 |
|                 | Ultrasound equipment                        | T125_02 (Y = 1,2,3; N = 4,NA)      | T125_02 (Y = 1; N = 2,3,4,NA)      | No Data                                | 1,2,3   |
| chronic RHD     | Benzathine penicillin                       | U106_18 (Y = 1,2; N = 3,4,5,NA)    | U106_18 (Y = 1; N = 2,3,4,5,NA)    | U106_18 = 5                            | 1,2,3,4 |
|                 | Injectable epinephrine                      | U125_20 (Y = 1,2; N = 3,4,5,NA)    | U125_20 (Y = 1; N = 2,3,4,5,NA)    | U125_20 = 5 AND U103_12 OR U103_12 = 5 | 1,2,3   |
| Type 1 diabetes | Blood glucose test equipment                | T105_01 (Y = 1,2; N = 3,NA)        | No data                            | No data                                | 1,2,3,4 |
|                 | Insulin                                     | U103_02 (Y = 1,2; N = 3,4,5,NA)    | U103_02 (Y = 1; N = 2,3,4,5,NA)    | U103_02 = 5                            | 1,2,3,4 |
| Type 2 diabetes | Blood glucose test equipment                | T105_01 (Y = 1,2; N = 3,NA)        | No data                            | No data                                | 1,2,3,4 |
|                 | Metformin or glibenclamide                  | U103_01 (Y = 1,2; N = 3,4,5,NA)    | U103_01 (Y = 1; N = 2,3,4,5,NA)    | U103_01 = 5 AND U103_14 OR U103_14 = 5 | 1,2,3,4 |
| Pain care       | Injectable morphine or pethidine            | U127_07 (Y = 1,2; N = 3,4,5,NA)    | U127_07 (Y = 1; N = 2,3,4,5,NA)    | U127_07 = 5                            | 1,2,3   |

|  |                                                                      |                                                                 |                                                                 |                                                                            |         |
|--|----------------------------------------------------------------------|-----------------------------------------------------------------|-----------------------------------------------------------------|----------------------------------------------------------------------------|---------|
|  |                                                                      |                                                                 |                                                                 |                                                                            |         |
|  | Oral pain medication (paracetamol, ibuprofen, aspirin or diclofenac) | U103_20 OR U103_17 OR U111_08 OR U103_08; Y = 1,2; N = 3,4,5,NA | U103_20 OR U103_17 OR U111_08 OR U103_08; Y = 1; N = 2,3,4,5,NA | U103_20 OR U103_17 OR U103_17 OR U103_17 OR U103_08; Y = 1; N = 2,3,4,5,NA | 1,2,3,4 |

\* Facility types: 1 = central hospitals, 2 = district hospitals, 3 = rural/community hospitals, 4 = health centres

Appendix Table 4: Missingness in HHFA data

|                             |                                                                             | Health Center (n=471) |                       | Rural Community Hospital (n=41) |                       | District Hospital (n=48) |                       | Central Hospital (n=4) |                       |
|-----------------------------|-----------------------------------------------------------------------------|-----------------------|-----------------------|---------------------------------|-----------------------|--------------------------|-----------------------|------------------------|-----------------------|
|                             |                                                                             | Missing data          |                       |                                 |                       |                          |                       |                        |                       |
| Condition                   | Essential Equipment & Medication                                            | Available Components  | Functional Components | Available Components            | Functional Components | Available Components     | Functional Components | Available Components   | Functional Components |
| <b>Chronic Conditions</b>   |                                                                             |                       |                       |                                 |                       |                          |                       |                        |                       |
| Chronic asthma              | Beclomethasone inhaler                                                      | 0%                    | 0%                    | 0%                              | 0%                    | 0%                       | 0%                    | 0%                     | 0%                    |
|                             | Salbutamol inhaler                                                          | 0%                    | 0%                    | 0%                              | 0%                    | 0%                       | 0%                    | 0%                     | 0%                    |
|                             | Stethoscope                                                                 | 1%                    | 1%                    | 0%                              | 0%                    | 0%                       | 0%                    | 0%                     | 0%                    |
|                             | At least two of: calcium channel blocker, ACE inhibitor, thiazide, atenolol | 0%                    | 0%                    | 0%                              | 0%                    | 0%                       | 0%                    | 0%                     | 0%                    |
| Hypertension (stage 1 or 2) | Blood pressure apparatus                                                    | 1%                    | 7%                    | 0%                              | 0%                    | 0%                       | 0%                    | 0%                     | 0%                    |
|                             | Stethoscope                                                                 | 1%                    | 1%                    | 0%                              | 0%                    | 0%                       | 0%                    | 0%                     | 0%                    |
| Type 1 diabetes             | Blood glucose                                                               | 2%                    | 100%                  | 0%                              | 100%                  | 0%                       | 100%                  | 0%                     | 100%                  |



|                                                               |                                                                               |     |      |     |      |     |      |    |      |
|---------------------------------------------------------------|-------------------------------------------------------------------------------|-----|------|-----|------|-----|------|----|------|
|                                                               | test equipment                                                                |     |      |     |      |     |      |    |      |
|                                                               | Insulin                                                                       | 0%  | 0%   | 0%  | 0%   | 0%  | 0%   | 0% | 0%   |
| Type 2 diabetes                                               | Blood glucose test equipment                                                  | 2%  | 100% | 0%  | 100% | 0%  | 100% | 0% | 100% |
|                                                               | Metformin or glibenclamide                                                    | 0%  | 0%   | 0%  | 0%   | 0%  | 0%   | 0% | 0%   |
| Pain care                                                     | Oral pain medication                                                          | 0%  | 0%   | 0%  | 0%   | 0%  | 0%   | 0% | 0%   |
|                                                               | Injectable morphine or pethidine                                              | 99% | 99%  | 15% | 15%  | 17% | 17%  | 0% | 0%   |
| Hypertension requiring three or more antihypertensive classes | At least three of: calcium channel blocker, ACE inhibitor, thiazide, atenolol | 0%  | 0%   | 0%  | 0%   | 0%  | 0%   | 0% | 0%   |
|                                                               | Blood pressure apparatus                                                      | 1%  | 7%   | 0%  | 0%   | 0%  | 0%   | 0% | 0%   |
|                                                               | Stethoscope                                                                   | 1%  | 1%   | 0%  | 0%   | 0%  | 0%   | 0% | 0%   |
| Heart failure                                                 | Adult scale                                                                   | 1%  | 7%   | 0%  | 2%   | 0%  | 2%   | 0% | 0%   |
|                                                               | Atenolol or other beta-blocker                                                | 0%  | 0%   | 0%  | 0%   | 0%  | 0%   | 0% | 0%   |
|                                                               | Blood pressure apparatus                                                      | 1%  | 7%   | 0%  | 0%   | 0%  | 0%   | 0% | 0%   |

|                            |                                                   |      |      |      |      |      |      |      |      |
|----------------------------|---------------------------------------------------|------|------|------|------|------|------|------|------|
|                            | Captopril, enalapril or other ACE inhibitor       | 0%   | 0%   | 0%   | 0%   | 0%   | 0%   | 0%   | 0%   |
|                            | Furosemide                                        | 0%   | 0%   | 0%   | 0%   | 0%   | 0%   | 0%   | 0%   |
|                            | Stethoscope                                       | 1%   | 1%   | 0%   | 0%   | 0%   | 0%   | 0%   | 0%   |
|                            | Ultrasound equipment                              | 99%  | 99%  | 15%  | 15%  | 17%  | 17%  | 0%   | 0%   |
| chronic RHD                | Benzathine penicillin                             | 0%   | 0%   | 0%   | 0%   | 0%   | 0%   | 0%   | 0%   |
|                            | Injectable epinephrine                            | 0%   | 0%   | 0%   | 0%   | 0%   | 0%   | 0%   | 0%   |
| <b>Acute Conditions</b>    |                                                   |      |      |      |      |      |      |      |      |
| Mild/moderate acute Asthma | Functional X-ray machine                          | 99%  | 99%  | 15%  | 15%  | 17%  | 17%  | 0%   | 0%   |
|                            | Oxygen availability (cylinder or concentrator)    | 1%   | 75%  | 0%   | 12%  | 0%   | 13%  | 0%   | 0%   |
|                            | Peak flow meter in NCD or general outpatient area | 100% | 100% | 100% | 100% | 100% | 100% | 100% | 100% |
|                            | Prednisolone                                      | 0%   | 0%   | 0%   | 0%   | 0%   | 0%   | 0%   | 0%   |
|                            | Pulse oximeter                                    | 2%   | 84%  | 2%   | 8%   | 2%   | 8%   | 0%   | 0%   |

|                              |                                                   |      |      |      |      |      |      |      |      |
|------------------------------|---------------------------------------------------|------|------|------|------|------|------|------|------|
|                              | Salbutamol inhaler                                | 0%   | 0%   | 0%   | 0%   | 0%   | 0%   | 0%   | 0%   |
|                              | Functional X-ray machine                          | 99%  | 99%  | 15%  | 15%  | 17%  | 17%  | 0%   | 0%   |
|                              | Oxygen availability (cylinder or concentrator)    | 1%   | 75%  | 0%   | 12%  | 0%   | 13%  | 0%   | 0%   |
|                              | Peak flow meter in NCD or general outpatient area | 100% | 100% | 100% | 100% | 100% | 100% | 100% | 100% |
|                              | Prednisolone                                      | 0%   | 0%   | 0%   | 0%   | 0%   | 0%   | 0%   | 0%   |
|                              | Pulse oximeter                                    | 2%   | 84%  | 2%   | 8%   | 2%   | 8%   | 0%   | 0%   |
|                              | Salbutamol inhaler                                | 0%   | 0%   | 0%   | 0%   | 0%   | 0%   | 0%   | 0%   |
|                              | Micro nebulizer in NCD or general outpatient area | 100% | 100% | 100% | 100% | 100% | 100% | 100% | 100% |
| Moderate/severe acute Asthma | Hydrocortisone injection                          | 0%   | 0%   | 0%   | 0%   | 0%   | 0%   | 0%   | 0%   |
| Acute diabetes               | Blood glucose test equipment                      | 2%   | 100% | 0%   | 100% | 0%   | 100% | 0%   | 100% |

|                                            |                                                                  |     |      |     |      |     |      |    |      |
|--------------------------------------------|------------------------------------------------------------------|-----|------|-----|------|-----|------|----|------|
|                                            | Blood pressure apparatus in NCD or general outpatient area       | 1%  | 7%   | 0%  | 0%   | 0%  | 0%   | 0% | 0%   |
|                                            | Infusion kit for intravenous fluids                              | 11% | 100% | 6%  | 100% | 6%  | 100% | 0% | 100% |
|                                            | Injectable glucose                                               | 0%  | 0%   | 0%  | 0%   | 0%  | 0%   | 0% | 0%   |
|                                            | Insulin                                                          | 0%  | 0%   | 0%  | 0%   | 0%  | 0%   | 0% | 0%   |
|                                            | Liver and kidney function diagnostics (creatinine, electrolytes) | 97% | 97%  | 6%  | 6%   | 6%  | 6%   | 0% | 0%   |
| Acute epilepsy                             | Diazepam injection                                               | 99% | 99%  | 15% | 15%  | 17% | 17%  | 0% | 0%   |
| Injuries/ acute minor surgical conditions+ | Lidocaine in minor surgical area                                 | 0%  | 0%   | 0%  | 0%   | 0%  | 0%   | 0% | 0%   |
|                                            | Nasogastric tubes in minor surgical area                         | 99% | 99%  | 13% | 23%  | 15% | 25%  | 0% | 0%   |
|                                            | Needle holder in minor surgical                                  | 99% | 99%  | 13% | 15%  | 15% | 17%  | 0% | 0%   |

|  |                                                |     |     |     |     |     |     |    |     |
|--|------------------------------------------------|-----|-----|-----|-----|-----|-----|----|-----|
|  | area                                           |     |     |     |     |     |     |    |     |
|  | Oxygen availability (cylinder or concentrator) | 1%  | 75% | 0%  | 12% | 0%  | 13% | 0% | 0%  |
|  | Retractor in minor surgical area               | 99% | 99% | 13% | 15% | 15% | 17% | 0% | 0%  |
|  | Scalpel in minor surgical area                 | 99% | 99% | 13% | 15% | 15% | 17% | 0% | 0%  |
|  | Skin disinfectant in minor surgical area       | 0%  | 0%  | 0%  | 0%  | 0%  | 0%  | 0% | 0%  |
|  | Surgical scissors in minor surgical area       | 99% | 99% | 13% | 15% | 15% | 17% | 0% | 0%  |
|  | Sutures in minor surgical area                 | 0%  | 0%  | 0%  | 0%  | 0%  | 0%  | 0% | 0%  |
|  | Tourniquet in minor surgical area              | 99% | 99% | 13% | 31% | 15% | 31% | 0% | 25% |

1  
2  
3  
4  
5  
6  
7  
8  
9  
10  
11  
12  
13  
14  
15  
16  
17  
18  
19  
20  
21  
22  
23  
24  
25  
26  
27  
28  
29  
30  
31  
32  
33  
34  
35  
36  
37  
38  
39  
40  
41  
42  
43  
44  
45  
46

Appendix Table 5: nebulizer and peak-flow meter availability from SPA data, 2015

| Medical component | Facility type              | Total facilities | Facilities with availability | % availability |
|-------------------|----------------------------|------------------|------------------------------|----------------|
| Nebulizer         | Central hospital           | 4                | 3                            | 75.00          |
|                   | District hospital          | 24               | 6                            | 25.00          |
|                   | Other hospital             | 47               | 28                           | 59.25          |
|                   | Rural / community hospital | 41               | 9                            | 21.95          |
|                   | Health center              | 473              | 24                           | 5.07           |
|                   | Clinic                     | 317              | 38                           | 12.02          |
|                   | Health post                | 20               | NA                           | NA             |
|                   | Maternity                  | 4                | NA                           | NA             |
|                   | Dispensary                 | 47               | 1                            | 2.00           |
|                   | Total                      | 977              | 109                          | 11.09          |
| Peak-flow meter   | Central hospital           | 4                | 1                            | 25.00          |
|                   | District hospital          | 24               | 1                            | 4.17           |
|                   | Other hospital             | 47               | 13                           | 27.58          |
|                   | Rural / community hospital | 41               | 2                            | 4.88           |
|                   | Health center              | 473              | 8                            | 1.68           |
|                   | Clinic                     | 317              | 12                           | 3.79           |
|                   | Health post                | 20               | NA                           | 0.00           |
|                   | Maternity                  | 4                | NA                           | 0.00           |
|                   | Dispensary                 | 47               | NA                           | 0.00           |
|                   | Total                      | 977              | 37                           | 3.76           |

Appendix Figure 1: Service readiness and availability of equipment and Medicines by level

## Part-1

| Category           | Condition                       | Essential Equipment & Medicines    | PHC (% functional) |     | STC (% functional) |      |
|--------------------|---------------------------------|------------------------------------|--------------------|-----|--------------------|------|
| Chronic Conditions | Chronic Asthma                  | SR                                 | 8                  | 8%  | 40                 | 40%  |
|                    |                                 | Beclomethasone inhaler             | 8                  | 8%  | 42                 | 42%  |
|                    |                                 | Salbutamol inhaler                 | 71                 | 71% | 88                 | 88%  |
|                    |                                 | Stethoscope                        | 93                 | 93% | 100                | 100% |
|                    | HTN (Stage 1 or 2)              | SR                                 | 34                 | 34% | 88                 | 88%  |
|                    |                                 | >=2: CCB, ACEI, thiazide, atenolol | 37                 | 37% | 88                 | 88%  |
|                    |                                 | Blood pressure apparatus           | 89                 | 89% | 98                 | 98%  |
|                    |                                 | Stethoscope                        | 93                 | 93% | 100                | 100% |
|                    | Type 1 diabetes                 | SR                                 | 5                  | 5%  | 88                 | 88%  |
|                    |                                 | Blood glucose apparatus            | 43                 | 43% | 98                 | 98%  |
|                    |                                 | Insulin                            | 6                  | 6%  | 90                 | 90%  |
|                    | Type 2 diabetes                 | SR                                 | 21                 | 21% | 94                 | 94%  |
|                    |                                 | Blood glucose apparatus            | 43                 | 43% | 98                 | 98%  |
|                    |                                 | Metformin/glibenclamide            | 30                 | 30% | 96                 | 96%  |
|                    | Chronic pain (oral)             | SR                                 | 95                 | 95% | 100                | 100% |
|                    |                                 | Oral pain medicine                 | 95                 | 95% | 100                | 100% |
|                    | Chronic pain (Injectable care)* | SR                                 | 22                 | 22% | 29                 | 29%  |
|                    |                                 | Injectable morphine/pethidine      | 22                 | 22% | 29                 | 29%  |
|                    | HTN (complicated)               | SR                                 | 15                 | 15% | 75                 | 75%  |
|                    |                                 | >=3: CCB, ACEI, thiazide, atenolol | 16                 | 16% | 75                 | 75%  |
|                    |                                 | Blood pressure apparatus           | 89                 | 89% | 98                 | 98%  |
|                    |                                 | Stethoscope                        | 93                 | 93% | 100                | 100% |
|                    | Chronic Heart Failure*          | SR                                 | 22                 | 22% | 38                 | 38%  |
|                    |                                 | Adult scale                        | 95                 | 95% | 98                 | 98%  |
|                    |                                 | Atenolol or other beta-blocker     | 71                 | 71% | 79                 | 79%  |
|                    |                                 | Blood pressure apparatus           | 93                 | 93% | 98                 | 98%  |
|                    |                                 | Captopril, enalapril or other ACEI | 66                 | 66% | 75                 | 75%  |
|                    |                                 | FRS                                | 71                 | 71% | 85                 | 85%  |
|                    |                                 | Stethoscope                        | 95                 | 95% | 100                | 100% |
|                    |                                 | Ultrasound equipment               | 34                 | 34% | 77                 | 77%  |
| Chronic RHD*       | SR                              | 32                                 | 32%                | 44  | 44%                |      |
|                    | BPG                             | 78                                 | 78%                | 83  | 83%                |      |
|                    | Injectable epinephrine          | 32                                 | 32%                | 56  | 56%                |      |

Part -2

| Category          | Condition                                 | Essential Equipment & Medicines                                                      | PHC (% functional)                                                                   |                                                                                      | STC (% functional)                                                                    |                                                                                       |                                                                                       |     |
|-------------------|-------------------------------------------|--------------------------------------------------------------------------------------|--------------------------------------------------------------------------------------|--------------------------------------------------------------------------------------|---------------------------------------------------------------------------------------|---------------------------------------------------------------------------------------|---------------------------------------------------------------------------------------|-----|
| Acute Conditions  | Acute Asthma (Mild/moderate)*             | SR                                                                                   | 17                                                                                   |    | 17%                                                                                   | 48                                                                                    |    | 48% |
|                   |                                           | Oxygen availability                                                                  | 85                                                                                   |    | 85%                                                                                   | 88                                                                                    |    | 88% |
|                   |                                           | Peak flow meter                                                                      | NA                                                                                   | NA                                                                                   |                                                                                       | NA                                                                                    | NA                                                                                    |     |
|                   |                                           | Prednisolone                                                                         | 73                                                                                   |    | 73%                                                                                   | 88                                                                                    |    | 88% |
|                   |                                           | Pulse oximeter                                                                       | 59                                                                                   |    | 59%                                                                                   | 88                                                                                    |    | 88% |
|                   |                                           | Salbutamol inhaler                                                                   | 93                                                                                   |    | 93%                                                                                   | 88                                                                                    |    | 88% |
|                   |                                           | X-ray                                                                                | 29                                                                                   |    | 29%                                                                                   | 73                                                                                    |    | 73% |
|                   | Acute Asthma (Moderate/severe)*           | SR                                                                                   | 15                                                                                   |    | 15%                                                                                   | 42                                                                                    |    | 42% |
|                   |                                           | X-ray                                                                                | 29                                                                                   |    | 29%                                                                                   | 73                                                                                    |    | 73% |
|                   |                                           | Oxygen availability                                                                  | 85                                                                                   |    | 85%                                                                                   | 88                                                                                    |    | 88% |
|                   |                                           | Peak flow meter                                                                      | NA                                                                                   | NA                                                                                   |                                                                                       | NA                                                                                    | NA                                                                                    |     |
|                   |                                           | Prednisolone                                                                         | 73                                                                                   |    | 73%                                                                                   | 88                                                                                    |    | 88% |
|                   |                                           | Pulse oximeter                                                                       | 60                                                                                   |    | 60%                                                                                   | 88                                                                                    |    | 88% |
|                   |                                           | Salbutamol inhaler                                                                   | 93                                                                                   |    | 93%                                                                                   | 88                                                                                    |    | 88% |
|                   |                                           | Micro nebuliser                                                                      | NA                                                                                   | NA                                                                                   |                                                                                       | NA                                                                                    | NA                                                                                    |     |
|                   | Acute diabetic event*                     | Hydrocortisone injection                                                             | 61                                                                                   |    | 61%                                                                                   | 85                                                                                    |    | 85% |
|                   |                                           | SR                                                                                   | 12                                                                                   |    | 12%                                                                                   | 87                                                                                    |    | 87% |
|                   |                                           | Blood glucose apparatus                                                              | 95                                                                                   |    | 95%                                                                                   | 98                                                                                    |    | 98% |
|                   |                                           | Blood pressure apparatus                                                             | 93                                                                                   |    | 93%                                                                                   | 98                                                                                    |    | 98% |
|                   |                                           | IV infusion kit                                                                      | 90                                                                                   |  | 90%                                                                                   | 92                                                                                    |  | 92% |
|                   |                                           | Injectable glucose                                                                   | 80                                                                                   |  | 80%                                                                                   | 92                                                                                    |  | 92% |
|                   |                                           | Insulin                                                                              | 46                                                                                   |  | 46%                                                                                   | 90                                                                                    |  | 90% |
|                   | Acute epilepsy*                           | Liver and kidney diagnosis                                                           | 17                                                                                   |  | 17%                                                                                   | 31                                                                                    |  | 31% |
|                   |                                           | SR                                                                                   | 36                                                                                   |  | 36%                                                                                   | 85                                                                                    |  | 85% |
|                   | Injuries/acute minor surgical conditions* | Diazepam injection                                                                   | 37                                                                                   |  | 37%                                                                                   | 85                                                                                    |  | 85% |
|                   |                                           | SR                                                                                   | 24                                                                                   |  | 24%                                                                                   | 46                                                                                    |  | 46% |
|                   |                                           | Lidocaine                                                                            | 95                                                                                   |  | 95%                                                                                   | 98                                                                                    |  | 98% |
|                   |                                           | Nasogastric tubes                                                                    | 66                                                                                   |  | 66%                                                                                   | 77                                                                                    |  | 77% |
|                   |                                           | Needle holder                                                                        | 90                                                                                   |  | 90%                                                                                   | 85                                                                                    |  | 85% |
|                   |                                           | Oxygen availability                                                                  | 85                                                                                   |  | 85%                                                                                   | 88                                                                                    |  | 88% |
| Retractor         |                                           | 51                                                                                   |  | 51%                                                                                  | 85                                                                                    |  | 85%                                                                                   |     |
| Scalpel           |                                           | 85                                                                                   |  | 85%                                                                                  | 85                                                                                    |  | 85%                                                                                   |     |
| Skin disinfectant |                                           | 85                                                                                   |  | 85%                                                                                  | 87                                                                                    |  | 87%                                                                                   |     |
| Surgical scissors |                                           | 78                                                                                   |  | 78%                                                                                  | 85                                                                                    |  | 85%                                                                                   |     |
| Sutures           | 90                                        |  | 90%                                                                                  | 98                                                                                   |  | 98%                                                                                   |                                                                                       |     |
| Tourniquet        | 59                                        |  | 59%                                                                                  | 69                                                                                   |  | 69%                                                                                   |                                                                                       |     |



1  
2  
3  
4  
5  
6  
7  
8  
9  
10  
11  
12  
13  
14  
15  
16  
17  
18  
19  
20  
21  
22  
23  
24  
25  
26  
27  
28  
29  
30  
31  
32  
33  
34  
35  
36  
37  
38  
39  
40  
41  
42  
43  
44  
45  
46  
47  
48  
49  
50  
51  
52  
53  
54  
55  
56  
57  
58  
59  
60

For peer review only

STROBE Statement—Checklist of items that should be included in reports of *cross-sectional studies*

|                              | Item No | Recommendation                                                                                                                                                                                               |    |
|------------------------------|---------|--------------------------------------------------------------------------------------------------------------------------------------------------------------------------------------------------------------|----|
| <b>Title and abstract</b>    | 1       | (a) Indicate the study's design with a commonly used term in the title or the abstract                                                                                                                       | √  |
|                              |         | (b) Provide in the abstract an informative and balanced summary of what was done and what was found                                                                                                          | √  |
| <b>Introduction</b>          |         |                                                                                                                                                                                                              |    |
| Background/rationale         | 2       | Explain the scientific background and rationale for the investigation being reported                                                                                                                         | √  |
| Objectives                   | 3       | State specific objectives, including any prespecified hypotheses                                                                                                                                             | √  |
| <b>Methods</b>               |         |                                                                                                                                                                                                              |    |
| Study design                 | 4       | Present key elements of study design early in the paper                                                                                                                                                      | √  |
| Setting                      | 5       | Describe the setting, locations, and relevant dates, including periods of recruitment, exposure, follow-up, and data collection                                                                              | √  |
| Participants                 | 6       | (a) Give the eligibility criteria, and the sources and methods of selection of participants                                                                                                                  | √  |
| Variables                    | 7       | Clearly define all outcomes, exposures, predictors, potential confounders, and effect modifiers. Give diagnostic criteria, if applicable                                                                     | √  |
| Data sources/<br>measurement | 8*      | For each variable of interest, give sources of data and details of methods of assessment (measurement). Describe comparability of assessment methods if there is more than one group                         | √  |
| Bias                         | 9       | Describe any efforts to address potential sources of bias                                                                                                                                                    | √  |
| Study size                   | 10      | Explain how the study size was arrived at                                                                                                                                                                    | √  |
| Quantitative variables       | 11      | Explain how quantitative variables were handled in the analyses. If applicable, describe which groupings were chosen and why                                                                                 | √  |
| Statistical methods          | 12      | (a) Describe all statistical methods, including those used to control for confounding                                                                                                                        | √  |
|                              |         | (b) Describe any methods used to examine subgroups and interactions                                                                                                                                          | √  |
|                              |         | (c) Explain how missing data were addressed                                                                                                                                                                  | √  |
|                              |         | (d) If applicable, describe analytical methods taking account of sampling strategy                                                                                                                           | NA |
|                              |         | (e) Describe any sensitivity analyses                                                                                                                                                                        | NA |
| <b>Results</b>               |         |                                                                                                                                                                                                              |    |
| Participants                 | 13*     | (a) Report numbers of individuals at each stage of study—eg numbers potentially eligible, examined for eligibility, confirmed eligible, included in the study, completing follow-up, and analysed            | NA |
|                              |         | (b) Give reasons for non-participation at each stage                                                                                                                                                         | NA |
|                              |         | (c) Consider use of a flow diagram                                                                                                                                                                           | NA |
| Descriptive data             | 14*     | (a) Give characteristics of study participants (eg demographic, clinical, social) and information on exposures and potential confounders                                                                     | NA |
|                              |         | (b) Indicate number of participants with missing data for each variable of interest                                                                                                                          | √  |
| Outcome data                 | 15*     | Report numbers of outcome events or summary measures                                                                                                                                                         | NA |
| Main results                 | 16      | (a) Give unadjusted estimates and, if applicable, confounder-adjusted estimates and their precision (eg, 95% confidence interval). Make clear which confounders were adjusted for and why they were included | NA |

1  
2  
3  
4  
5  
6  
7  
8  
9  
10  
11  
12  
13  
14  
15  
16  
17  
18  
19  
20  
21  
22  
23  
24  
25  
26  
27  
28  
29  
30  
31  
32  
33  
34  
35  
36  
37  
38  
39  
40  
41  
42  
43  
44  
45  
46  
47  
48  
49  
50  
51  
52  
53  
54  
55  
56  
57  
58  
59  
60

(b) Report category boundaries when continuous variables were categorized NA

(c) If relevant, consider translating estimates of relative risk into absolute risk for a meaningful time period NA

|                          |    |                                                                                                                                                                            |   |
|--------------------------|----|----------------------------------------------------------------------------------------------------------------------------------------------------------------------------|---|
| Other analyses           | 17 | Report other analyses done—eg analyses of subgroups and interactions, and sensitivity analyses                                                                             | √ |
| <b>Discussion</b>        |    |                                                                                                                                                                            |   |
| Key results              | 18 | Summarise key results with reference to study objectives                                                                                                                   | √ |
| Limitations              | 19 | Discuss limitations of the study, taking into account sources of potential bias or imprecision. Discuss both direction and magnitude of any potential bias                 | √ |
| Interpretation           | 20 | Give a cautious overall interpretation of results considering objectives, limitations, multiplicity of analyses, results from similar studies, and other relevant evidence | √ |
| Generalisability         | 21 | Discuss the generalisability (external validity) of the study results                                                                                                      | √ |
| <b>Other information</b> |    |                                                                                                                                                                            |   |
| Funding                  | 22 | Give the source of funding and the role of the funders for the present study and, if applicable, for the original study on which the present article is based              | √ |

\*Give information separately for exposed and unexposed groups.

**Note:** An Explanation and Elaboration article discusses each checklist item and gives methodological background and published examples of transparent reporting. The STROBE checklist is best used in conjunction with this article (freely available on the Web sites of PLoS Medicine at <http://www.plosmedicine.org/>, Annals of Internal Medicine at <http://www.annals.org/>, and Epidemiology at <http://www.epidem.com/>). Information on the STROBE Initiative is available at [www.strobe-statement.org](http://www.strobe-statement.org).
