# Supplementary material for: Service readiness for the management of non-communicable diseases in publicly financed facilities in Malawi: findings from the 2019 Harmonised Health Facility Assessment census survey
Source: PubMed Central journal article supplement — BMJ Open. 2024 Jan 4;14(1):e072511. doi: 10.1136/bmjopen-2023-072511 (PMC10773330; doi:10.1136/bmjopen-2023-072511), 2024-01-04
Supplement: bmjopen-2023-072511supp001.pdf [file bmjopen-2023-072511supp001.pdf]

Appendix Table 1. Summary of publicly financed facility representation in each category

| Facility type                     | Primary health care (PHC) facilities |                                 |       | Secondary and tertiary care (STC) facilities |                   |       |
|-----------------------------------|--------------------------------------|---------------------------------|-------|----------------------------------------------|-------------------|-------|
|                                   | Health centers                       | Rural/Community hospitals (RCH) | Total | District hospitals                           | Central hospitals | Total |
| <b>Total facilities</b>           | 485                                  | 41                              | 526   | 48                                           | 5                 | 53    |
| <b>Non-functional facilities*</b> | 14                                   | 0                               | 14    | 0                                            | 0                 | 0     |
| <b>HHFA samples</b>               | 471**                                | 41                              | 512   | 48                                           | 4                 | 52    |

\*We consider the facilities not surveyed by the HHFA as "non-functional" because HHFA is a census survey.

\*\*Three quasi-district hospitals were categorized as "District Hospitals": Ndirande Health Centre, Matawale Health Centre, and Mzuzu Health Centre.

Appendix Table 2: NCD services analyzed by expected level of service

| Condition                                                     | Primary health care facilities |                           | Secondary and tertiary facilities |                   |
|---------------------------------------------------------------|--------------------------------|---------------------------|-----------------------------------|-------------------|
|                                                               | Health Centers                 | Rural/Community Hospitals | District Hospitals                | Central Hospitals |
| <b>Controlled chronic conditions</b>                          |                                |                           |                                   |                   |
| Chronic asthma                                                | x                              | x                         | x                                 | x                 |
| Hypertension (stage 1 or 2)                                   | x                              | x                         | x                                 | x                 |
| Type 1 diabetes                                               | x                              | x                         | x                                 | x                 |
| Type 2 diabetes                                               | x                              | x                         | x                                 | x                 |
| Oral pain care                                                | x                              | x                         | x                                 | x                 |
| Injectable pain care                                          |                                | x                         | x                                 | x                 |
| Hypertension requiring three or more antihypertensive classes | x                              | x                         | x                                 | x                 |
| Heart failure                                                 |                                | x                         | x                                 | x                 |
| Chronic RHD                                                   |                                | x                         | x                                 | x                 |
| <b>Acute exacerbations and complications</b>                  |                                |                           |                                   |                   |
| Mild/moderate acute Asthma                                    |                                | x                         | x                                 | x                 |
| Moderate/severe acute Asthma                                  |                                | x                         | x                                 | x                 |
| Acute diabetic events                                         |                                | x                         | x                                 | x                 |
| Acute epilepsy                                                |                                | x                         | x                                 | x                 |
| injuries/ acute minor Surgical conditions+                    |                                | x                         | x                                 | x                 |

Appendix Table 3: Service Indicators

## Part 1: Acute conditions

| diseases                   | Essential equipment and medications               | Availability Indicators                                                                    | Functionality Indicators                                                        | “Never Available” Data Availability | Facility Types Surveyed* |
|----------------------------|---------------------------------------------------|--------------------------------------------------------------------------------------------|---------------------------------------------------------------------------------|-------------------------------------|--------------------------|
| Mild/moderate acute Asthma | Functional X-ray machine                          | T125_01 (Y = 1,2,3; N = 4,NA)                                                              | T125_01 (Y = 1; N = 2,4,NA)                                                     | No Data                             | 1,2,3                    |
|                            | Oxygen availability (cylinder or concentrator)    | HH101_22 (Y = “Yes”, N = “No”, NA) <b>OR</b> HH101_23 (cylinder) (Y = “Yes”, N = “No”, NA) | HH101A22 (Y = “Yes”, N = “No”, NA) <b>OR</b> HH101A23 (Y = “Yes”, N = “No”, NA) | No Data                             | 1,2,3,4                  |
|                            | Peak flow meter in NCD or general outpatient area | No Data (used SPA data for estimation)                                                     | No Data                                                                         | No Data                             | No Data                  |
|                            | Prednisolone                                      | U103_10 (Y = 1,2; N = 3,4,5,NA)                                                            | U103_10 (Y = 1; N = 2,3,4,5,NA)                                                 | U103_10 = 5                         | 1,2,3,4                  |
|                            | Pulse oximeter                                    | HH101_8 (Y = “Yes”, N = “No”, NA)                                                          | HH101A8 (Y = “Yes”, N = “No”, NA)                                               | No Data                             | 1,2,3,4                  |
|                            | Salbutamol inhaler                                | U103_21 (Y = 1,2; N = 3,4,5,NA)                                                            | U103_21 (Y = 1; N = 2,3,4,5,NA)                                                 | U103_21 = 5                         | 1,2,3,4                  |
| Moderate/severe Asthma     | Functional X-ray machine                          | T125_01 (Y = 1,2,3; N = 4,NA)                                                              | T125_01 (Y = 1; N = 2,4,NA)                                                     | No data                             | 1,2,3                    |
|                            | Oxygen availability (cylinder or concentrator)    | HH101_22 (Y = “Yes”, N = “No”, NA) <b>OR</b> HH101_23 (cylinder) (Y = “Yes”, N = “No”, NA) | HH101A22 (Y = “Yes”, N = “No”, NA) <b>OR</b> HH101A23 (Y = “Yes”, N = “No”, NA) | No data                             | 1,2,3,4                  |
|                            | Peak flow meter in NCD or general                 | No Data (used SPA data for estimation)                                                     | No data                                                                         | No data                             | No data                  |

|                |                                                                  |                                                                                                    |                                                                            |                                                                            |                                                     |
|----------------|------------------------------------------------------------------|----------------------------------------------------------------------------------------------------|----------------------------------------------------------------------------|----------------------------------------------------------------------------|-----------------------------------------------------|
|                | outpatient area                                                  |                                                                                                    |                                                                            |                                                                            |                                                     |
|                | Prednisolone                                                     | U103_10 (Y = 1, 2; N = 3,4,5,NA)                                                                   | U103_10 (Y = 1; N = 2,3,4,5,NA)                                            | U103_10 (Y = 1; N = 2,3,4,5,NA)                                            | 1,2,3,4                                             |
|                | Pulse oximeter                                                   | HH101_8 (Y = "Yes", N = "No", NA)                                                                  | HH101A8 (Y = "Yes", N = "No", NA)                                          | No data                                                                    | 1,2,3,4                                             |
|                | Salbutamol inhaler                                               | U103_21 (Y = 1, 2, 3, 4, 5, NA)                                                                    | U103_21 (Y = 1; N = 2, 3, 4, 5, NA)                                        | U103_21 (Y = 1; N = 2, 3, 4, 5, NA)                                        | 1,2,3,4                                             |
|                | Micro nebuliser in NCD or general outpatient area                | No Data (used in SPA data for estimation)                                                          | No Data                                                                    | No Data                                                                    | No Data                                             |
|                | Hydrocortisone injection                                         | U103_11 (Y = 1, 2, 3, 4, 5, NA)                                                                    | U103_11 (Y = 1; N = 2, 3, 4, 5, NA)                                        | U103_11 (Y = 1; N = 2, 3, 4, 5, NA)                                        | 1,2,3,4                                             |
| Acute diabetes | Blood glucose test equipment                                     | T105_01 (Y = 1, 2; N = 3, NA)                                                                      | No Data                                                                    | No Data                                                                    | 1,2,3,4                                             |
|                | Blood pressure apparatus in NCD or general outpatient area       | HH101_15 (Y = "Yes", N = "No", NA)                                                                 | HH101A15 (Y = "Yes", N = "No", NA)                                         | No Data                                                                    | 1,2,3,4                                             |
|                | Infusion kit for intravenous fluids                              | M116_161 (Y = "Yes", N = "No")                                                                     | No Data                                                                    | No Data                                                                    | 1,2,3,4                                             |
|                | Injectable glucose                                               | U103_03 (Y = 1, 2, 3, 4, 5, NA)                                                                    | U103_03 (Y = 1; N = 2, 3, 4, 5, NA)                                        | U103_03 (Y = 1; N = 2, 3, 4, 5, NA)                                        | 1,2,3,4                                             |
|                | Insulin                                                          | U103_02 (Y = 1, 2, 3, 4, 5, NA)                                                                    | U103_02 (Y = 1; N = 2, 3, 4, 5, NA)                                        | U103_02 (Y = 1; N = 2, 3, 4, 5, NA)                                        | 1,2,3,4                                             |
|                | Liver and kidney function diagnostics (creatinine, electrolytes) | T113_03 (Y = 1, 2; N = 3, NA) Or T122_01 (Y = 1, 2; N = 3, NA) Or T123_01 (Y = 1, 2, 3; N = 4, NA) | T123_01 (Y = 1; N = 2, 3, 4, NA)                                           | T123_01 (Y = 1; N = 2, 3, 4, NA)                                           | 1,2,3                                               |
| Acute epilepsy | Diazepam injection                                               | U125_16 (Y = 1, 2, 3, 4, 5, NA) Or U126_05 (Y = 1, 2, 3, 4, 5, NA)                                 | U125_16 (Y = 1; N = 2, 3, 4, 5, NA) Or U126_05 (Y = 1; N = 2, 3, 4, 5, NA) | U125_16 (Y = 1; N = 2, 3, 4, 5, NA) Or U126_05 (Y = 1; N = 2, 3, 4, 5, NA) | All facility types <b>And</b> M103.Yes.Conta ins(8) |

|                                            |                                                |                                                                                     |                                                                          |                         |         |
|--------------------------------------------|------------------------------------------------|-------------------------------------------------------------------------------------|--------------------------------------------------------------------------|-------------------------|---------|
|                                            |                                                | 1,2; N = 3,4,5,NA)                                                                  | 1; N = 2,3,4,5,NA)                                                       |                         |         |
| Injuries/ acute minor surgical conditions+ | Lidocaine in minor surgical area               | U125_12 (Y = 1,2; N = 3,4,5,NA)                                                     | U125_12 (Y = 1; N = 2,3,4,5,NA)                                          | U125_12 (Y = 1,2,3,4,5) | 1,2,3,4 |
|                                            | Nasogastric tubes in minor surgical area       | RR115_7 (Y = "Yes", N = "No", NA)                                                   | RR115A7 (Y = "Yes", N = "No", NA)                                        | No Data                 | 1,2,3   |
|                                            | Needle holder in minor surgical area           | RR115_3 (Y = "Yes", N = "No", NA)                                                   | RR115A3 (Y = "Yes", N = "No", NA)                                        | No Data                 | 1,2,3   |
|                                            | Oxygen availability (cylinder or concentrator) | HH101_22 (Y = "Yes", N = "No", NA) OR HH101_23 (cylinder) (Y = "Yes", N = "No", NA) | HH101A22 (Y = "Yes", N = "No", NA) OR HH101A23 (Y = "Yes", N = "No", NA) | No Data                 | 1,2,3,4 |
|                                            | Retractor in minor surgical area               | RR115_5 (Y = "Yes", N = "No", NA))                                                  | RR115A5 (Y = "Yes", N = "No", NA))                                       | No Data                 | 1,2,3   |
|                                            | Scalpel in minor surgical area                 | RR115_4 (Y = "Yes", N = "No", NA))                                                  | RR115A4 (Y = "Yes", N = "No", NA))                                       | No Data                 | 1,2,3   |
|                                            | Skin disinfectant in minor surgical area       | U125_05 (Y = 1,2; N = 3,4,5,NA)                                                     | U125_05 (Y = 1, N = 2,3,4,5,NA)                                          | U125_05 (Y = 1,2,3,4,5) | 1,2,3,4 |
|                                            | Surgical scissors in minor surgical area       | RR115_6 (Y = "Yes", N = "No", NA)                                                   | RR115A6 (Y = "Yes", N = "No", NA)                                        | No Data                 | 1,2,3   |
|                                            | Sutures in minor surgical area                 | U125_09 (Y = 1,2; N = 3,4,5)                                                        | U125_09 (Y = 1; N = 2,3,4,5)                                             | U125_09 (Y = 1,2,3,4,5) | 1,2,3,4 |
|                                            | Tourniquet in minor surgical area              | RR115_8 (Y = "Yes", N = "No", NA)                                                   | RR115A8 (Y = "Yes", N = "No", NA)                                        | No Data                 | 1,2,3   |

Part 2: Chronic Conditions

| Conditions     | Availability of complete essential equipment and medications | Availability Indicators      | Functionality Indicators     | "Never Available" Data Availability | Facility Types Surveyed |
|----------------|--------------------------------------------------------------|------------------------------|------------------------------|-------------------------------------|-------------------------|
| Chronic asthma | Beclomethasone                                               | U103_09 (Y = 1,2; N = 3,4,5) | U103_09 (Y = 1; N = 2,3,4,5) | U103_09 (Y = 1,2,3,4,5)             | 1,2,3,4                 |

|                                                               |                                                                               |                                                         |                                                         |                                                         |         |
|---------------------------------------------------------------|-------------------------------------------------------------------------------|---------------------------------------------------------|---------------------------------------------------------|---------------------------------------------------------|---------|
|                                                               | inhaler                                                                       | 1,2; N = 3,4,5,NA                                       | 1; N = 2,3,4,5,NA)                                      | =5                                                      |         |
|                                                               | Salbutamol inhaler                                                            | U103_21 (Y = 1,2; N = 3,4,5,NA)                         | U103_21 (Y = 1; N = 2,3,4,5,NA)                         | U103_21 =5                                              | 1,2,3,4 |
|                                                               | Stethoscope                                                                   | HH101_13 (Y = "Yes", N = "No", NA)                      | HH101A3 (Y = "Yes", N = "No", NA)                       | No Data                                                 | 1,2,3,4 |
| Hypertension (stage 1 or 2)                                   | At least two of: calcium channel blocker, ACE inhibitor, thiazide, atenolol   | U103_04, U103_05, U103_06, U103_07 (Y = 1,2; N = 3,4,5) | U103_04, U103_05, U103_06, U103_07 (Y = 1; N = 2,3,4,5) | U103_04 =5 AND U103_05 =5 AND U103_06 =5 AND U103_07 =5 | 1,2,3,4 |
|                                                               | Blood pressure apparatus                                                      | HH101_15 (Y = "Yes", N = "No",NA)                       | HH101A15 (Y = "Yes", N = "No",NA)                       | No data                                                 | 1,2,3,4 |
|                                                               | Stethoscope                                                                   | HH101_13 (Y = "Yes", N = "No", NA)                      | HH101A3 (Y = "Yes", N = "No", NA)                       | No data                                                 | 1,2,3,4 |
| Hypertension requiring three or more antihypertensive classes | At least three of: calcium channel blocker, ACE inhibitor, thiazide, atenolol | U103_04, U103_05, U103_06, U103_07 (Y = 1,2; N = 3,4,5) | U103_04, U103_05, U103_06, U103_07 (Y = 1; N = 2,3,4,5) | U103_04 =5 AND U103_05 =5 AND U103_06 =5 AND U103_07 =5 | 1,2,3,4 |
|                                                               | Blood pressure apparatus                                                      | HH101_15 (Y = "Yes", N = "No",NA)                       | HH101A15 (Y = "Yes", N = "No",NA)                       | No data                                                 | 1,2,3,4 |
|                                                               | Stethoscope                                                                   | HH101_13 (Y = "Yes", N = "No", NA)                      | HH101A3 (Y = "Yes", N = "No", NA)                       | No data                                                 | 1,2,3,4 |
| Heart failure                                                 | Adult scale                                                                   | HH101_1 (Y = "Yes", N = "No", NA)                       | HH101A1 (Y = "Yes", N = "No", NA)                       | No Data                                                 | 1,2,3,4 |
|                                                               | Atenolol or other beta-blocker                                                | U103_06 (Y = 1,2; N = 3,4,5,NA)                         | U103_06 (Y = 1; N = 2,3,4,5,NA)                         | U103_06 =5                                              | 1,2,3,4 |

|                 |                                             |                                                                           |                                                                            |                                    |         |
|-----------------|---------------------------------------------|---------------------------------------------------------------------------|----------------------------------------------------------------------------|------------------------------------|---------|
|                 | Blood pressure apparatus                    | HH101_15 (Y = "Yes", N = "No", NA)                                        | HH101A15 (Y = "Yes", N = "No", NA)                                         | No data                            | 1,2,3,4 |
|                 | Captopril, enalapril or other ACE inhibitor | U103_04 (Y = 1,2; N = 3,4,5,NA)                                           | U103_04 (Y = 1; N = 2,3,4,5,NA)                                            | U103_04 = 5                        | 1,2,3,4 |
|                 | Furosemide                                  | U103_13 (Y = 1,2; N = 3,4,5,NA)                                           | U103_13 (Y = 1; N = 2,3,4,5,NA)                                            | U103_13 = 5                        | 1,2,3,4 |
|                 | Stethoscope                                 | HH101_13 (Y = "Yes", N = "No", NA)                                        | HH101A3 (Y = "Yes", N = "No", NA)                                          | No data                            | 1,2,3,4 |
|                 | Ultrasound equipment                        | T125_02 (Y = 1,2,3; N = 4,NA)                                             | T125_02 (Y = 1; N = 2,3,4,NA)                                              | No Data                            | 1,2,3   |
| chronic RHD     | Benzathine penicillin                       | U106_18 (Y = 1,2; N = 3,4,5,NA)                                           | U106_18 (Y = 1; N = 2,3,4,5,NA)                                            | U106_18 = 5                        | 1,2,3,4 |
|                 | Injectable epinephrine                      | U125_20 (Y = 1,2; N = 3,4,5,NA) <b>OR</b> U103_12 (Y = 1,2; N = 3,4,5,NA) | U125_20 (Y = 1; N = 2,3,4,5,NA) <b>OR</b> U103_12 (Y = 1; N = 2,3,4,5,NA)  | U125_20 = 5 <b>AND</b> U103_12 = 5 | 1,2,3   |
| Type 1 diabetes | Blood glucose test equipment                | T105_01 (Y = 1,2; N = 3,NA)                                               | No data                                                                    | No data                            | 1,2,3,4 |
|                 | Insulin                                     | U103_02 (Y = 1,2; N = 3,4,5,NA)                                           | U103_02 (Y = 1; N = 2,3,4,5,NA)                                            | U103_02 = 5                        | 1,2,3,4 |
| Type 2 diabetes | Blood glucose test equipment                | T105_01 (Y = 1,2; N = 3,NA)                                               | No data                                                                    | No data                            | 1,2,3,4 |
|                 | Metformin or glibenclamide                  | U103_01 (Y = 1,2; N = 3,4,5,NA) <b>OR</b> U103_14 (Y = 1,2; N = 3,4,5,NA) | U103_01 (Y = 1; N = 2,3,4,5,NA) <b>AND</b> U103_14 (Y = 1; N = 2,3,4,5,NA) | U103_01 = 5 <b>AND</b> U103_14 = 5 | 1,2,3,4 |
| Pain care       | Injectable morphine or pethidine            | U127_07 (Y = 1,2; N = 3,4,5,NA)                                           | U127_07 (Y = 1; N = 2,3,4,5,NA)                                            | U127_07 = 5                        | 1,2,3   |

|  |                                                                      |                                                                 |                                                                    |                                                         |         |
|--|----------------------------------------------------------------------|-----------------------------------------------------------------|--------------------------------------------------------------------|---------------------------------------------------------|---------|
|  |                                                                      |                                                                 |                                                                    |                                                         |         |
|  | Oral pain medication (paracetamol, ibuprofen, aspirin or diclofenac) | U103_20 OR U103_17 OR U111_08 OR U103_08; Y = 1,2; N = 3,4,5,NA | OR U103_20 OR U103_17 OR U111_08 OR U103_08; Y = 1; N = 2,3,4,5,NA | OR U103_20 OR U103_17 OR U103_08; Y = 1; N = 2,3,4,5,NA | 1,2,3,4 |

\* Facility types: 1 = central hospitals, 2 = district hospitals, 3 = rural/community hospitals, 4 = health centres



Appendix Table 4: Missingness in HHFA data

|                             |                                                                             | Health Center (n=471) |                       | Rural Community Hospital (n=41) |                       | District Hospital (n=48) |                       | Central Hospital (n=4) |                       |
|-----------------------------|-----------------------------------------------------------------------------|-----------------------|-----------------------|---------------------------------|-----------------------|--------------------------|-----------------------|------------------------|-----------------------|
|                             |                                                                             | Missing data          |                       |                                 |                       |                          |                       |                        |                       |
| Condition                   | Essential Equipment & Medication                                            | Available Components  | Functional Components | Available Components            | Functional Components | Available Components     | Functional Components | Available Components   | Functional Components |
| <b>Chronic Conditions</b>   |                                                                             |                       |                       |                                 |                       |                          |                       |                        |                       |
| Chronic asthma              | Beclomethasone inhaler                                                      | 0%                    | 0%                    | 0%                              | 0%                    | 0%                       | 0%                    | 0%                     | 0%                    |
|                             | Salbutamol inhaler                                                          | 0%                    | 0%                    | 0%                              | 0%                    | 0%                       | 0%                    | 0%                     | 0%                    |
|                             | Stethoscope                                                                 | 1%                    | 1%                    | 0%                              | 0%                    | 0%                       | 0%                    | 0%                     | 0%                    |
|                             | At least two of: calcium channel blocker, ACE inhibitor, thiazide, atenolol | 0%                    | 0%                    | 0%                              | 0%                    | 0%                       | 0%                    | 0%                     | 0%                    |
| Hypertension (stage 1 or 2) | Blood pressure apparatus                                                    | 1%                    | 7%                    | 0%                              | 0%                    | 0%                       | 0%                    | 0%                     | 0%                    |
|                             | Stethoscope                                                                 | 1%                    | 1%                    | 0%                              | 0%                    | 0%                       | 0%                    | 0%                     | 0%                    |
| Type 1 diabetes             | Blood glucose                                                               | 2%                    | 100%                  | 0%                              | 100%                  | 0%                       | 100%                  | 0%                     | 100%                  |

|                                                               |                                                                               |     |      |     |      |     |      |    |      |
|---------------------------------------------------------------|-------------------------------------------------------------------------------|-----|------|-----|------|-----|------|----|------|
|                                                               | test equipment                                                                |     |      |     |      |     |      |    |      |
|                                                               | Insulin                                                                       | 0%  | 0%   | 0%  | 0%   | 0%  | 0%   | 0% | 0%   |
| Type 2 diabetes                                               | Blood glucose test equipment                                                  | 2%  | 100% | 0%  | 100% | 0%  | 100% | 0% | 100% |
|                                                               | Metformin or glibenclamide                                                    | 0%  | 0%   | 0%  | 0%   | 0%  | 0%   | 0% | 0%   |
| Pain care                                                     | Oral pain medication                                                          | 0%  | 0%   | 0%  | 0%   | 0%  | 0%   | 0% | 0%   |
|                                                               | Injectable morphine or pethidine                                              | 99% | 99%  | 15% | 15%  | 17% | 17%  | 0% | 0%   |
| Hypertension requiring three or more antihypertensive classes | At least three of: calcium channel blocker, ACE inhibitor, thiazide, atenolol | 0%  | 0%   | 0%  | 0%   | 0%  | 0%   | 0% | 0%   |
|                                                               | Blood pressure apparatus                                                      | 1%  | 7%   | 0%  | 0%   | 0%  | 0%   | 0% | 0%   |
|                                                               | Stethoscope                                                                   | 1%  | 1%   | 0%  | 0%   | 0%  | 0%   | 0% | 0%   |
| Heart failure                                                 | Adult scale                                                                   | 1%  | 7%   | 0%  | 2%   | 0%  | 2%   | 0% | 0%   |
|                                                               | Atenolol or other beta-blocker                                                | 0%  | 0%   | 0%  | 0%   | 0%  | 0%   | 0% | 0%   |
|                                                               | Blood pressure apparatus                                                      | 1%  | 7%   | 0%  | 0%   | 0%  | 0%   | 0% | 0%   |

|                            |                                                   |      |      |      |      |      |      |      |      |
|----------------------------|---------------------------------------------------|------|------|------|------|------|------|------|------|
|                            | Captopril, enalapril or other ACE inhibitor       | 0%   | 0%   | 0%   | 0%   | 0%   | 0%   | 0%   | 0%   |
|                            | Furosemide                                        | 0%   | 0%   | 0%   | 0%   | 0%   | 0%   | 0%   | 0%   |
|                            | Stethoscope                                       | 1%   | 1%   | 0%   | 0%   | 0%   | 0%   | 0%   | 0%   |
|                            | Ultrasound equipment                              | 99%  | 99%  | 15%  | 15%  | 17%  | 17%  | 0%   | 0%   |
| chronic RHD                | Benzathine penicillin                             | 0%   | 0%   | 0%   | 0%   | 0%   | 0%   | 0%   | 0%   |
|                            | Injectable epinephrine                            | 0%   | 0%   | 0%   | 0%   | 0%   | 0%   | 0%   | 0%   |
| <b>Acute Conditions</b>    |                                                   |      |      |      |      |      |      |      |      |
| Mild/moderate acute Asthma | Functional X-ray machine                          | 99%  | 99%  | 15%  | 15%  | 17%  | 17%  | 0%   | 0%   |
|                            | Oxygen availability (cylinder or concentrator)    | 1%   | 75%  | 0%   | 12%  | 0%   | 13%  | 0%   | 0%   |
|                            | Peak flow meter in NCD or general outpatient area | 100% | 100% | 100% | 100% | 100% | 100% | 100% | 100% |
|                            | Prednisolone                                      | 0%   | 0%   | 0%   | 0%   | 0%   | 0%   | 0%   | 0%   |
|                            | Pulse oximeter                                    | 2%   | 84%  | 2%   | 8%   | 2%   | 8%   | 0%   | 0%   |

|                              |                                                   |                              |      |      |      |      |      |      |      |
|------------------------------|---------------------------------------------------|------------------------------|------|------|------|------|------|------|------|
|                              | Salbutamol inhaler                                | 0%                           | 0%   | 0%   | 0%   | 0%   | 0%   | 0%   | 0%   |
| Moderate/severe acute Asthma | Functional X-ray machine                          | 99%                          | 99%  | 15%  | 15%  | 17%  | 17%  | 0%   | 0%   |
|                              | Oxygen availability (cylinder or concentrator)    | 1%                           | 75%  | 0%   | 12%  | 0%   | 13%  | 0%   | 0%   |
|                              | Peak flow meter in NCD or general outpatient area | 100%                         | 100% | 100% | 100% | 100% | 100% | 100% | 100% |
|                              | Prednisolone                                      | 0%                           | 0%   | 0%   | 0%   | 0%   | 0%   | 0%   | 0%   |
|                              | Pulse oximeter                                    | 2%                           | 84%  | 2%   | 8%   | 2%   | 8%   | 0%   | 0%   |
|                              | Salbutamol inhaler                                | 0%                           | 0%   | 0%   | 0%   | 0%   | 0%   | 0%   | 0%   |
|                              | Micro nebulizer in NCD or general outpatient area | 100%                         | 100% | 100% | 100% | 100% | 100% | 100% | 100% |
|                              | Hydrocortisone injection                          | 0%                           | 0%   | 0%   | 0%   | 0%   | 0%   | 0%   | 0%   |
|                              | Acute diabetes                                    | Blood glucose test equipment | 2%   | 100% | 0%   | 100% | 0%   | 100% | 0%   |

|                                            |                                                                  |     |      |     |      |     |      |    |      |
|--------------------------------------------|------------------------------------------------------------------|-----|------|-----|------|-----|------|----|------|
|                                            | Blood pressure apparatus in NCD or general outpatient area       | 1%  | 7%   | 0%  | 0%   | 0%  | 0%   | 0% | 0%   |
|                                            | Infusion kit for intravenous fluids                              | 11% | 100% | 6%  | 100% | 6%  | 100% | 0% | 100% |
|                                            | Injectable glucose                                               | 0%  | 0%   | 0%  | 0%   | 0%  | 0%   | 0% | 0%   |
|                                            | Insulin                                                          | 0%  | 0%   | 0%  | 0%   | 0%  | 0%   | 0% | 0%   |
|                                            | Liver and kidney function diagnostics (creatinine, electrolytes) | 97% | 97%  | 6%  | 6%   | 6%  | 6%   | 0% | 0%   |
| Acute epilepsy                             | Diazepam injection                                               | 99% | 99%  | 15% | 15%  | 17% | 17%  | 0% | 0%   |
| Injuries/ acute minor surgical conditions+ | Lidocaine in minor surgical area                                 | 0%  | 0%   | 0%  | 0%   | 0%  | 0%   | 0% | 0%   |
|                                            | Nasogastric tubes in minor surgical area                         | 99% | 99%  | 13% | 23%  | 15% | 25%  | 0% | 0%   |
|                                            | Needle holder in minor surgical                                  | 99% | 99%  | 13% | 15%  | 15% | 17%  | 0% | 0%   |

|  |                                                |     |     |     |     |     |     |    |     |
|--|------------------------------------------------|-----|-----|-----|-----|-----|-----|----|-----|
|  | area                                           |     |     |     |     |     |     |    |     |
|  | Oxygen availability (cylinder or concentrator) | 1%  | 75% | 0%  | 12% | 0%  | 13% | 0% | 0%  |
|  | Retractor in minor surgical area               | 99% | 99% | 13% | 15% | 15% | 17% | 0% | 0%  |
|  | Scalpel in minor surgical area                 | 99% | 99% | 13% | 15% | 15% | 17% | 0% | 0%  |
|  | Skin disinfectant in minor surgical area       | 0%  | 0%  | 0%  | 0%  | 0%  | 0%  | 0% | 0%  |
|  | Surgical scissors in minor surgical area       | 99% | 99% | 13% | 15% | 15% | 17% | 0% | 0%  |
|  | Sutures in minor surgical area                 | 0%  | 0%  | 0%  | 0%  | 0%  | 0%  | 0% | 0%  |
|  | Tourniquet in minor surgical area              | 99% | 99% | 13% | 31% | 15% | 31% | 0% | 25% |

Appendix Table 5: nebulizer and peak-flow meter availability from SPA data, 2015

| Medical component | Facility type              | Total facilities | Facilities with availability | % availability |
|-------------------|----------------------------|------------------|------------------------------|----------------|
| Nebulizer         | Central hospital           | 4                | 3                            | 75.00          |
|                   | District hospital          | 24               | 6                            | 25.00          |
|                   | Other hospital             | 47               | 28                           | 59.25          |
|                   | Rural / community hospital | 41               | 9                            | 21.95          |
|                   | Health center              | 473              | 24                           | 5.07           |
|                   | Clinic                     | 317              | 38                           | 12.02          |
|                   | Health post                | 20               | NA                           | NA             |
|                   | Maternity                  | 4                | NA                           | NA             |
|                   | Dispensary                 | 47               | 1                            | 2.00           |
|                   | Total                      | 977              | 109                          | 11.09          |
| Peak-flow meter   | Central hospital           | 4                | 1                            | 25.00          |
|                   | District hospital          | 24               | 1                            | 4.17           |
|                   | Other hospital             | 47               | 13                           | 27.58          |
|                   | Rural / community hospital | 41               | 2                            | 4.88           |
|                   | Health center              | 473              | 8                            | 1.68           |
|                   | Clinic                     | 317              | 12                           | 3.79           |
|                   | Health post                | 20               | NA                           | 0.00           |
|                   | Maternity                  | 4                | NA                           | 0.00           |
|                   | Dispensary                 | 47               | NA                           | 0.00           |
|                   | Total                      | 977              | 37                           | 3.76           |

Appendix Figure 1: Service readiness and availability of equipment and Medicines by level

**Part-1**

| Category           | Condition                       | Essential Equipment & Medicines    | PHC (% functional) |     | STC (% functional) |      |
|--------------------|---------------------------------|------------------------------------|--------------------|-----|--------------------|------|
| Chronic Conditions | Chronic Asthma                  | SR                                 | 8                  | 8%  | 40                 | 40%  |
|                    |                                 | Beclomethasone inhaler             | 8                  | 8%  | 42                 | 42%  |
|                    |                                 | Salbutamol inhaler                 | 71                 | 71% | 88                 | 88%  |
|                    |                                 | Stethoscope                        | 93                 | 93% | 100                | 100% |
|                    | HTN (Stage 1 or 2)              | SR                                 | 34                 | 34% | 88                 | 88%  |
|                    |                                 | >=2: CCB, ACEI, thiazide, atenolol | 37                 | 37% | 88                 | 88%  |
|                    |                                 | Blood pressure apparatus           | 89                 | 89% | 98                 | 98%  |
|                    |                                 | Stethoscope                        | 93                 | 93% | 100                | 100% |
|                    | Type 1 diabetes                 | SR                                 | 5                  | 5%  | 88                 | 88%  |
|                    |                                 | Blood glucose apparatus            | 43                 | 43% | 98                 | 98%  |
|                    |                                 | Insulin                            | 6                  | 6%  | 90                 | 90%  |
|                    | Type 2 diabetes                 | SR                                 | 21                 | 21% | 94                 | 94%  |
|                    |                                 | Blood glucose apparatus            | 43                 | 43% | 98                 | 98%  |
|                    |                                 | Metformin/glibenclamide            | 30                 | 30% | 96                 | 96%  |
|                    | Chronic pain (oral)             | SR                                 | 95                 | 95% | 100                | 100% |
|                    |                                 | Oral pain medicine                 | 95                 | 95% | 100                | 100% |
|                    | Chronic pain (Injectable care)* | SR                                 | 22                 | 22% | 29                 | 29%  |
|                    |                                 | Injectable morphine/pethidine      | 22                 | 22% | 29                 | 29%  |
|                    | HTN (complicated)               | SR                                 | 15                 | 15% | 75                 | 75%  |
|                    |                                 | >=3: CCB, ACEI, thiazide, atenolol | 16                 | 16% | 75                 | 75%  |
|                    |                                 | Blood pressure apparatus           | 89                 | 89% | 98                 | 98%  |
|                    |                                 | Stethoscope                        | 93                 | 93% | 100                | 100% |
|                    | Chronic Heart Failure*          | SR                                 | 22                 | 22% | 38                 | 38%  |
|                    |                                 | Adult scale                        | 95                 | 95% | 98                 | 98%  |
|                    |                                 | Atenolol or other beta-blocker     | 71                 | 71% | 79                 | 79%  |
|                    |                                 | Blood pressure apparatus           | 93                 | 93% | 98                 | 98%  |
|                    |                                 | Captopril, enalapril or other ACEI | 66                 | 66% | 75                 | 75%  |
|                    |                                 | FRS                                | 71                 | 71% | 85                 | 85%  |
|                    |                                 | Stethoscope                        | 95                 | 95% | 100                | 100% |
|                    |                                 | Ultrasound equipment               | 34                 | 34% | 77                 | 77%  |
| Chronic RHD*       | SR                              | 32                                 | 32%                | 44  | 44%                |      |
|                    | BPG                             | 78                                 | 78%                | 83  | 83%                |      |
|                    | Injectable epinephrine          | 32                                 | 32%                | 56  | 56%                |      |



## Part -2

| Category          | Condition                                 | Essential Equipment & Medicines                                                     | PHC (% functional)                                                                  |                                                                                     | STC (% functional)                                                                    |                                                                                       |                                                                                       |     |
|-------------------|-------------------------------------------|-------------------------------------------------------------------------------------|-------------------------------------------------------------------------------------|-------------------------------------------------------------------------------------|---------------------------------------------------------------------------------------|---------------------------------------------------------------------------------------|---------------------------------------------------------------------------------------|-----|
| Acute Conditions  | Acute Asthma (Mild/moderate)*             | SR                                                                                  | 17                                                                                  |    | 17%                                                                                   | 48                                                                                    |    | 48% |
|                   |                                           | Oxygen availability                                                                 | 85                                                                                  |    | 85%                                                                                   | 88                                                                                    |    | 88% |
|                   |                                           | Peak flow meter                                                                     | NA                                                                                  | NA                                                                                  |                                                                                       | NA                                                                                    | NA                                                                                    |     |
|                   |                                           | Prednisolone                                                                        | 73                                                                                  |    | 73%                                                                                   | 88                                                                                    |    | 88% |
|                   |                                           | Pulse oximeter                                                                      | 59                                                                                  |    | 59%                                                                                   | 88                                                                                    |    | 88% |
|                   |                                           | Salbutamol inhaler                                                                  | 93                                                                                  |    | 93%                                                                                   | 88                                                                                    |    | 88% |
|                   |                                           | X-ray                                                                               | 29                                                                                  |    | 29%                                                                                   | 73                                                                                    |    | 73% |
|                   | Acute Asthma (Moderate/severe)*           | SR                                                                                  | 15                                                                                  |    | 15%                                                                                   | 42                                                                                    |    | 42% |
|                   |                                           | X-ray                                                                               | 29                                                                                  |    | 29%                                                                                   | 73                                                                                    |    | 73% |
|                   |                                           | Oxygen availability                                                                 | 85                                                                                  |    | 85%                                                                                   | 88                                                                                    |    | 88% |
|                   |                                           | Peak flow meter                                                                     | NA                                                                                  | NA                                                                                  |                                                                                       | NA                                                                                    | NA                                                                                    |     |
|                   |                                           | Prednisolone                                                                        | 73                                                                                  |    | 73%                                                                                   | 88                                                                                    |    | 88% |
|                   |                                           | Pulse oximeter                                                                      | 60                                                                                  |    | 60%                                                                                   | 88                                                                                    |    | 88% |
|                   |                                           | Salbutamol inhaler                                                                  | 93                                                                                  |    | 93%                                                                                   | 88                                                                                    |    | 88% |
|                   | Acute diabetic event*                     | Micro nebuliser                                                                     | NA                                                                                  | NA                                                                                  |                                                                                       | NA                                                                                    | NA                                                                                    |     |
|                   |                                           | Hydrocortisone injection                                                            | 61                                                                                  |    | 61%                                                                                   | 85                                                                                    |    | 85% |
|                   |                                           | SR                                                                                  | 12                                                                                  |    | 12%                                                                                   | 87                                                                                    |    | 87% |
|                   |                                           | Blood glucose apparatus                                                             | 95                                                                                  |    | 95%                                                                                   | 98                                                                                    |    | 98% |
|                   |                                           | Blood pressure apparatus                                                            | 93                                                                                  |    | 93%                                                                                   | 98                                                                                    |    | 98% |
|                   |                                           | IV infusion kit                                                                     | 90                                                                                  |    | 90%                                                                                   | 92                                                                                    |    | 92% |
|                   |                                           | Injectable glucose                                                                  | 80                                                                                  |   | 80%                                                                                   | 92                                                                                    |   | 92% |
|                   | Acute epilepsy*                           | Insulin                                                                             | 46                                                                                  |  | 46%                                                                                   | 90                                                                                    |  | 90% |
|                   |                                           | Liver and kidney diagnosis                                                          | 17                                                                                  |  | 17%                                                                                   | 31                                                                                    |  | 31% |
|                   | Injuries/acute minor surgical conditions* | SR                                                                                  | 36                                                                                  |  | 36%                                                                                   | 85                                                                                    |  | 85% |
|                   |                                           | Diazepam injection                                                                  | 37                                                                                  |  | 37%                                                                                   | 85                                                                                    |  | 85% |
|                   |                                           | SR                                                                                  | 24                                                                                  |  | 24%                                                                                   | 46                                                                                    |  | 46% |
|                   |                                           | Lidocaine                                                                           | 95                                                                                  |  | 95%                                                                                   | 98                                                                                    |  | 98% |
|                   |                                           | Nasogastric tubes                                                                   | 66                                                                                  |  | 66%                                                                                   | 77                                                                                    |  | 77% |
|                   |                                           | Needle holder                                                                       | 90                                                                                  |  | 90%                                                                                   | 85                                                                                    |  | 85% |
|                   |                                           | Oxygen availability                                                                 | 85                                                                                  |  | 85%                                                                                   | 88                                                                                    |  | 88% |
| Retractor         |                                           | 51                                                                                  |  | 51%                                                                                 | 85                                                                                    |  | 85%                                                                                   |     |
| Scalpel           |                                           | 85                                                                                  |  | 85%                                                                                 | 85                                                                                    |  | 85%                                                                                   |     |
| Skin disinfectant |                                           | 85                                                                                  |  | 85%                                                                                 | 87                                                                                    |  | 87%                                                                                   |     |
| Surgical scissors | 78                                        |  | 78%                                                                                 | 85                                                                                  |  | 85%                                                                                   |                                                                                       |     |
|                   | Sutures                                   | 90                                                                                  |  | 90%                                                                                 | 98                                                                                    |  | 98%                                                                                   |     |
|                   | Tourniquet                                | 59                                                                                  |  | 59%                                                                                 | 69                                                                                    |  | 69%                                                                                   |     |
